# Supplementary material for: Two-Gene Phylogeny of Bright-Spored Myxomycetes (Slime Moulds, Superorder Lucisporidia)
Source: PLoS One. 2013 May 7;8(5):e62586. doi: 10.1371/journal.pone.0062586 (PMC3646832; doi:10.1371/journal.pone.0062586)
Supplement: Supporting Information S1 — SSU alignment in fasta format of the 51 sequences used in Fig. 1. The first sequence indicates the positions retained for phylogenetic analyses. (FSA) [file pone.0062586.s007.fsa]

>Alignment_1325
-------------------------------yyyyyyyyyyyyyyyyyyy-yyyyyyyyy
yyyyyyyy--yyyy----------------------------------------------
----------------------------yyyyyyyyyyyyyyyyyyyyyyyyyyyyyyyy
y-yyyy------------------------------------------------------
------------------------------------------------------------
------------------------------------------------------------
----------------------------------------------------------yy
yy-yyyyyyyyyyYyyyyyyyy-yyyyyyyyyyyyyy-----------------------
------------------------------------------------------------
------------------------------------------------------------
------------------------------------------------------------
------------------------------------------------------------
------------------------------------------------------------
------------------------------------------------------------
------------------------------------------------------------
------------------------------------------------------------
----------------------------------------yyyyyyyyyyyyyyyyyyyy
yyyyyy-yyy-yyyyyyyyyyyyyyyyyyyyyy-yyyyyyyyyyyyyyyyyyyyyyyyyy
yyyyyyyyyyyyyyyyyyyyyyyyyyyyyyyyyyyyyyyyyyyyyyyyyyyyyyyyyyyy
yyyyyyyyyyyyyyyyyyyyyy----------------------yyyyyyyyyyyyyyyy
yyyyyyyyyyyyyyyyyy-------------yyyyyyyyyyyyyy-yyyyyyyyyyyyyy
yyyyy-yyyyyyyy-------yyyyyyyyyyyyyyyyyyyyyyyyyy-------------
------------------------------------------------------------
------------------------------------------------------------
------------------------------------------------------------
------------------------------------------------------------
------------------------------------------------------------
------------------------------------------------------------
------------------------------------------------------------
------------------------------------------------------------
------------------------------------------------------------
------------------------------------------------------------
------------------------------------------------------------
------------------------------------------------------------
------------------------------------------------------------
------------------------------------------------------------
------------------------------------------------------------
------------------------------------------------------------
------------------------------------------------------------
------------------------------------------------------------
--------------------------------------------------------yyyy
yyyyyyyyy---------------------------------------------------
------------------------------------------------------------
------------------------------------------------------------
------------------------------------------------------------
------------------------------------------------------------
------------------------------------------------------------
------------------------------------------------------------
------------------------------------------------------------
------------------------------------------------------------
------------------------------------------------------------
------------------------------------------------------------
------------------------------------------------------------
------------------------------------------------------------
------------------------------------------------------------
------------------------------------------------------------
------------------------------------------------------------
------------------------------------------------------------
------------------------------------------------------------
------------------------------------------------------------
------------------------------------------------------------
--------------------------------------yyyyyyyyyyyyyyyyyyyyyy
yyyyyyyyyyyyyyyyyyyyyyyyyyyyyyyyyyyyyy----------------------
------------------------------------------------------------
------------------------------------------------------------
------------------------------------------------------------
------------------------------------------------------------
------------------------------------------------------------
------------------------------------------------------------
------------------------------------------------------------
------------------------------------------------------------
------------------------------------------------------------
-----------------------------------------------------yyyyyyy
yyyyyyyy--yyyyyyyyyyyyyyyyyyyyyyyyyyyy----------------------
--------------------------------yyyyy-yyyyyy-yyyyyyyyyyyyyyy
yyyyyyy-----------------------------------------------------
------------------------------------------------------------
--------------------------------------------yyyy-yyyyyyyyyyy
yyyyyyyyyyyyyyyyyyyyyyyyyyyyyyyyyyyyyyyyyyyyyyyyyyyyyyyyyyyy
yyyyyyyyyyyyyyyyyyyy-yyyyyyyyyyyyyyyyyyyyyyyyyyyyyyyyyyyyyyy
yyyyyyyyyyyyy-----------------------------------------------
------------------------------------------------------------
------------------------------------------------------------
------------------------------------------------------------
------------------------------------------------------------
------------------------------------------------------------
------------------------------------------------------------
------------------------------------------------------------
------------------------------------------------------------
------------------------------------------------------------
------------------------------------------------------------
------------------------------------------------------------
------------------------------------------------------------
------------------------------------------------------------
------------------------------------------------------------
------------------------------------------------------------
------------------------------------------------------------
---yyyyyyyyyyyyyyyyyyyyyyyyyyyyyyyyyyyyyyyyyyyyyyyyyyyy-yyyy
yyyyy------yyyyyyyyyyyyyyyyyyy---------------yyyyyyyyy--yyyy
yyyyyyyyyyyyyyyyyyyyyyyyyyyyyyyyyyyyyyyy--------------------
------------------------------------------------------------
------------------------------------------------------------
------------------------------------------------------------
------------------------------------------------------------
------------------------------------------------------------
------------------------------------------------------------
------------------------------------------------------------
------------------------------------------------------------
------------------------------------------------------------
------------------------------------------------------------
------------------------------------------------------------
------------------------------------------------------------
------------------------------------------------------------
---------------------------------------------------------yyy
yyyyyyyyyyyyyyyyy-yyyyyyyyyyyy------------------------------
------------------------------------------------------------
------------------------------------------------------------
------------------------------------------------------------
------------------------------------------------------------
----------------------------yyyyyyyyyyyyy-------------------
------------------------------------------------------------
------------------------------------------------------------
------------------------------------------------------------
------------------------------------------------------------
------------------------------------------------------------
------------------------------------------------------------
------------------------------------------------------------
------------------------------------------------------------
------------------------------------------------------------
------------------------------------------------------------
------------------------------------------------------------
------------------------------------------------------------
------------------------------------------------------------
------------------------------------------------------------
------------------------------------------------------------
------------------------------------------------------------
------------------------------------------------------------
------------------------------------------------------------
------------------------------------------------------------
------------------------------------------------------------
------------------------------------------------------------
------------------------------------------------------------
------------------------------------------------------------
------------------------------------------------------------
------------------------------------------------------------
--------------------------------------yyyyyyyyyyyyyyyyyyyyyy
yyyyyyyyyyyyyyyyyyyyyyyyyyyyyyyyyyyyyyyyyyyyyyyyyyyyy--yyyyy
yyyyyyyyyyyyyyyyyyyyy---------------------------------------
------------------------------------------------------------
------------------------------------------------------------
------------------------------------------------------------
------------------------------------------------------------
------------------------------------------------------------
------------------------------------------------------------
------------------------------------------------------------
------------------------------------------------------------
---------yyyyyyyyyyyyyy-yyyyyyyyyyyyyyyyyyyyyyyyyyyyyyyyyyyy
yyyyyyyyyyyyyyyyyyyyy---------------------------------------
------------------------------------------------------------
------------------------------------------------------------
------------------------------------------------------------
------------------------------------------------------------
--------------------------------yyyyyyyyyyyyyyyyyyyyyy---yyy
yyyyyyyyyy-------yyyyyyyyyyyyyyy----------------------------
------------------------------------------------------------
------------------------------------------------------------
------------------------------------------------------------
------------------------------------------------------------
------------------------------------------------------------
------------------------------------------------------------
------------------------------------------------------------
------------------------------------------------------------
------------------------------------------------------------
------------------------------------------------------------
------------------------------------------------------------
-----------------------yyyy-yyyyyyyy------------------------
------------------------------------------------------------
------------------------------------------------------------
------------------------------------------------------------
------------------------------------------------------------
------------------------------------------------------------
------------------------------------------------------------
-------------yyyyyyy--yyyyyyyyyyyyyyyyyyyyyyyyyyyyyyyy--yyyy
yyyy--------------------------------------------------------
-yyyyyyyy--------yyyyyyyy-yyyyyyyyyyy---yyyyyyyyyyyy-yyyyyyy
yyyyyyyyyyyyyyyyyyyy--------yyyyyyyyyyyyyyyyyyyyyyyyyyyyy-yy
yyyyyyyyyyyyyyyyyyyyyyyyyyyyyyyy----------------------------
------------------------------------------------------------
------------------------------------------------------------
------------------------------------------------------------
------------------------------------------------------------
------------------------------------------------------------
------------------------------------------------------------
------------------------------------------------------------
------------------------------------------------------------
-------------------------yyyyyyyyyyyyyyyyyyyyyyyyyyyyyyyyyyy
yyyyyyyyyyyyyyyyyyyyyyyyyyyyyyyy----------------------------
------------------------------------------------------------
------------------------------------------------------------
------------------------------------------------------------
------------------------------------------------------------
------------------------------------------------------------
------------------------------------------------------------
------------------------------------------------------------
------------------------------------------------------------
------------------------------------------------------------
------------------------------------------------------------
------------------------------------------------------------
------------------------------------------------------------
------------------------------------------------------------
------------------------------------------------------------
------------------------------------------------------------
------------------------------------------------------------
------------------------------------------------------------
------------------------------------------------------------
------------------------------------------------------------
------------------------------------------------------------
------------------------------------------------------------
------------------------------------------------------------
------------------------------------------------------------
------------------------------------------------------------
------------------------------------------------------------
------------------------------------------------------------
------------------------------------------------------------
------------------------------------------------------------
------------------------------------------------------------
------------------------------------------------------------
------------------------------------------------------------
------------------------------------------------------------
------------------------------------------------------------
------------------------------------------------------
>Arcyodes_incarnata_JX481280
-------------------------------n----------------------------
------------------------------------------------------------
-------------------------------------AACGGCTCCGTATATCTGTTATC
A-CCAATTGCCCTTGTTAAGCCTAGCATACCGG---------------------------
------------------------------------------------------------
------------------------------------------------------------
------------------------------------------------------CCA-GC
GG-ATATGGCACGGTAATTCTG-TCAGTAATACGTTCAGCGTGGGGTGCTTCATCGCTCC
CACAGCTAGCATATGGTGTGGGTCCGTTCCTTCGTCAACGGCCAGGGCTCCTCAGCCAAC
CCCACCATTACTTCAATGCTATGGCTTTGCACTGTGAT----------------------
------------------------------------------------------------
------------------------------------------------------------
------------------------------------------------------------
----------------------CAGCGACTTCAGGGACTGGGGGGTTTATGATTGCGTGC
AAATGTGC-CGAA-----------------------------------------------
------------------------------------------------------------
------------------------CCCTGGG--GGGG---GGAGGCATTGGGTATCAGAC
CTATCA-ACT-CGGAGGCTGGGTAAGTGCCAGC-CTCGGTGATAACGGGTACAGAGGATC
AGGGTTCGGTCCTGGAGAGGTAGCCTGAGAGATCGCTACTACTTCTAAGGAAGGCAGCAG
GCGCGCAACGTTCCCAATGGGGTG-------CTACC--------CCTGAGGACGTGAAGG
GACATAACAATGCCCCCCCT-CATAA----AGGGGGGGTAATTGC-AATGGGGGCGTCAC
AAACC-TCCCACCG-------AGTAACAATTGGAGGACAAGTCTGGT-------------
------------------------------------------------------------
------------------------------------------------------------
------------------------------------------------------------
------------------------------------------------------------
------------------------------------------------------------
------------------------------------------------------------
------------------------------------------------------------
------------------------------------------------------------
------------------------------------------------------------
------------------------------------------------------------
------------------------------------------------------------
------------------------------------------------------------
------------------------------------------------------------
------------------------------------------------------------
------------------------------------------------------------
------------------------------------------------------------
------------------------------------------------------------
------------------------------------------------------------
--------------------------------------------------------GCCA
GCACCCGCG---------------------------------------------------
------------------------------------------------------------
------------------------------------------------------------
------------------------------------------------------------
------------------------------------------------------------
------------------------------------------------------------
------------------------------------------------------------
------------------------------------------------------------
------------------------------------------------------------
------------------------------------------------------------
------------------------------------------------------------
------------------------------------------------------------
------------------------------------------------------------
------------------------------------------------------------
------------------------------------------------------------
------------------------------------------------------------
------------------------------------------------------------
------------------------------------------------------------
------------------------------------------------------------
------------------------------------------------------------
--------------------------------------GTAATTCCAGCTCCAATAGCAT
CTATTTAAGTTGTTGCAGTTAAAACGCTCGTAGTCAGA-GCAGG--GCGTGTCTACCCCC
TGAAA-------------------GTACCCCACGCGATTTACATAGTCGCGTGCAAGCGA
AATTGGGGTTTGGTTCAAGGGCATT------------------------------GCCTA
TGGTTCCCCCCCCCGGCGCCTGGACCCTGTGCCGGCTGG---------------------
------------------------------------------------------------
------------------------------------------------------------
------------------------------------------------------------
------------------------------------------------------------
------------------------------------------------------------
------------------------------------------------------------
-----------------------------------------------GGTGTGGGACTTT
TCCTTGAG--GAAATGTGAGCGCTCAACGCACCCCACAC----GGGGT------------
--------------------------------ATGTA-ACCTGC-AGCAAGGAATAATAC
AGCAGGCTCACGCCGGCTTG----TGTTGGTCAGCCAGC---------------------
------------------------------------------------------------
-----------------------------------------AGGAGAA-TGGTCAATAGG
GGCGATCGGGGTCAGCCACACGTGGGGGGTAGGGGTGAAATCCGTTGATCCTCCATGGGT
GAACAAGAGCGAAAGCAGCT-GACAAGTACGCTTTCTTTGATCAAGAACGAAAGTCTGGG
GATCGAAGATGAT-----------------------------------------------
------------------------------------------------------------
------------------------------------------------------------
------------------------------------------------------------
------------------------------------------------------------
------------------------------------------------------------
------------------------------------------------------------
------------------------------------------------------------
------------------------------------------------------------
------------------------------------------------------------
------------------------------------------------------------
------------------------------------------------------------
------------------------------------------------------------
------------------------------------------------------------
------------------------------------------------------------
------------------------------------------------------------
------------------------------------------------------------
---CAGATACCATCGTAGTCCAGACCCTAAATGCTGCCAACCATGGATGGGCTAG-CGTC
CATCC------CGACCCGCCCCGCACATTA---------------GAGAAATCA--AAGT
GTATGGGCTCCGGGGGGAGTATGGTTGCAAGACTGAAACT--------------------
------------------------------------------------------------
------------------------------------------------------------
------------------------------------------------------------
------------------------------------------------------------
------------------------------------------------------------
------------------------------------------------------------
------------------------------------------------------------
------------------------------------------------------------
------------------------------------------------------------
------------------------------------------------------------
------------------------------------------------------------
------------------------------------------------------------
------------------------------------------------------------
---------------------------------------------------------TAA
AGGAATTGACGGAAGAG-CACACAAGGAGT------------------------------
------------------------------------------------------------
------------------------------------------------------------
------------------------------------------------------------
------------------------------------------------------------
----------------------------GGAGCCTGCGGCT-------------------
------------------------------------------------------------
------------------------------------------------------------
------------------------------------------------------------
------------------------------------------------------------
------------------------------------------------------------
------------------------------------------------------------
------------------------------------------------------------
------------------------------------------------------------
------------------------------------------------------------
------------------------------------------------------------
------------------------------------------------------------
------------------------------------------------------------
------------------------------------------------------------
------------------------------------------------------------
------------------------------------------------------------
------------------------------------------------------------
------------------------------------------------------------
------------------------------------------------------------
------------------------------------------------------------
------------------------------------------------------------
------------------------------------------------------------
------------------------------------------------------------
------------------------------------------------------------
------------------------------------------------------------
------------------------------------------------------------
--------------------------------------TAATTTGACTCAACACGGGAAA
ACTCACTAGAGCAAGAGAGGGGTATGATGGCCGGCTCGAAGAGCCTGTTAAGA--TTCCC
TCAGCGGTGGTGCATGGTCGT---------------------------------------
------------------------------------------------------------
------------------------------------------------------------
------------------------------------------------------------
------------------------------------------------------------
------------------------------------------------------------
------------------------------------------------------------
------------------------------------------------------------
------------------------------------------------------------
---------TCTTAGTTCGTGGA-TTGATTTGTCTGGTCTATTCCGCTAACGAGCGAGAA
CCCGCCCTCAGGATGTTGCCC-AGTTCACCGTGTG----TCAGGCT--GATGCCTCAAGG
AGTGAAATCCCCCCCGTGGGACGGAACGAATTGGGCTGGCCGGGTACTGTAGGTGG----
------------------------------------------------------------
------------------------------------------------------------
------------------------------------------------------------
--------------------------CGAAAGGGGCCTGCT-GGGCAA-CCGGT---CGA
CAAGGTCGGT-TTTT--GGGTCAATAACAGGT----------------------------
------------------------------------------------------------
------------------------------------------------------------
------------------------------------------------------------
------------------------------------------------------------
------------------------------------------------------------
------------------------------------------------------------
------------------------------------------------------------
------------------------------------------------------------
------------------------------------------------------------
------------------------------------------------------------
------------------------------------------------------------
-----------------------CAGT-GATGCCCT------------------------
------------------------------------------------------------
------------------------------------------------------------
------------------------------------------------------------
------------------------------------------------------------
------------------------------------------------------------
------------------------------------------------------------
-------------TAGATGC--TCTCGGCTGCACGCGCGCTACAATGGCGGGGC--CACC
GGGTT-------------------------------------------------------
-TCAGCCCC-------TCACGGGTG-CGGAAAATCCTCTTAAAACCCGTCCC-ATCCGGG
ACCATGGCATGTAATGTGCT--------TTGCGAACACGGAATTTCTAGTATTCATG-GT
TCACTAGACCATGGCGATTCTGTCCCTGCTCT----------------------------
------------------------------------------------------------
------------------------------------------------------------
------------------------------------------------------------
------------------------------------------------------------
------------------------------------------------------------
------------------------------------------------------------
------------------------------------------------------------
------------------------------------------------------------
-------------------------TTGTACACACCGCCCGTCGCTCCTACCGATTGGGC
TGGGGGGTGAGATTGGAGGACTCAAACATAGGC---------------------------
------------------------------------------------------------
------------------------------------------------------------
------------------------------------------------------------
------------------------------------------------------------
------------------------------------------------------------
------------------------------------------------------------
------------------------------------------------------------
------------------------------------------------------------
------------------------------------------------------------
------------------------------------------------------------
------------------------------------------------------------
------------------------------------------------------------
------------------------------------------------------------
------------------------------------------------------------
------------------------------------------------------------
------------------------------------------------------------
------------------------------------------------------------
------------------------------------------------------------
------------------------------------------------------------
------------------------------------------------------------
------------------------------------------------------------
------------------------------------------------------------
------------------------------------------------------------
------------------------------------------------------------
------------------------------------------------------------
------------------------------------------------------------
------------------------------------------------------------
------------------------------------------------------------
------------------------------------------------------------
------------------------------------------------------------
------------------------------------------------------------
-------------------------------------------------AGCCCCCCTGT
GGCCTGGTGCGCTTGCGAGCCACCTTTAGCCTTGACAATCTCG--TCGAACCTTTTGGTC
TAGAGGAAGGAGAAGTC
>Arcyria_cinerea_JX481281
-------------------------------n------------AAGATT-AAGCCATGC
ATGCGAAA--GACAATTCG-AGGA----GA----CTCTC---------------------
-------------------------ACAAAATCTGCGAACGGCTCCGTATATCTGTTAAA
A-CCCGTTGCC-CGTGGGAAAGGTTGG---------------------------------
------------------------------------------------------------
------------------------------------------------------------
------------------------------------------------------TAA-GC
GG-ATATCGCTCGGCAATTCTG-TCAGTAATACGTGT-ACGTGCAGCGTGTCCAACATTC
AGCTTAACCGTGGCCCGACGGCCCGCTGTAGCAGGATGGACGGACTCCGGAACGCCCAGC
TCTACCAAGAGTTAGGAAACCGCCG-----------------------------------
------------------------------------------------------------
------------------------------------------------------------
------------------------------------------------------------
-------------------------------------------------------AGAA-
GTGA--AC-CAAG-CCCT------------------------------------------
------------------------------------------------------------
-------------------------ATGGGA--ACCT---GGAGGCAACGGTTTTCAGAC
CTATCA-ACT-TGAAGCCTGTGGAGGGTACAGG-CCTGGTTTTAACGGGTACAGAGGATC
AGGGTTCGGTCCTGGAGAGGTAGCCTGAGAGATCGCTACTACTTCTAAGGAAGGCAGCAG
GCGCGCAACGTTCCCAATGGAGGC-------ATAGGCCC-----CCTGAGGACGTGACGG
GACATACCAATACCCAGCCC--GAAG----GGCTTGGGTAATCGG-AATGGGGGGAACCT
AAACCCCACGACCG-------AGTAACAATTGGAGGACAAGTCTGGT-------------
------------------------------------------------------------
------------------------------------------------------------
------------------------------------------------------------
------------------------------------------------------------
------------------------------------------------------------
------------------------------------------------------------
------------------------------------------------------------
------------------------------------------------------------
------------------------------------------------------------
------------------------------------------------------------
------------------------------------------------------------
------------------------------------------------------------
------------------------------------------------------------
------------------------------------------------------------
------------------------------------------------------------
------------------------------------------------------------
------------------------------------------------------------
------------------------------------------------------------
--------------------------------------------------------GCCA
GCACCCGCG---------------------------------------------------
------------------------------------------------------------
------------------------------------------------------------
------------------------------------------------------------
------------------------------------------------------------
------------------------------------------------------------
------------------------------------------------------------
------------------------------------------------------------
------------------------------------------------------------
------------------------------------------------------------
------------------------------------------------------------
------------------------------------------------------------
------------------------------------------------------------
------------------------------------------------------------
------------------------------------------------------------
------------------------------------------------------------
------------------------------------------------------------
------------------------------------------------------------
------------------------------------------------------------
------------------------------------------------------------
--------------------------------------GTAATTCCAGCTCCAATAGCAT
CTAATTAAGTTGTTGCAGTTAAAACGCTCGTAGTTCGA-ATCCG--GTGCAAAGCGCGCG
GCTGCTCTGGGGAA----------CAGGTGTGATGGCTCTGCCGTTGCCCGCCTCTCCTT
AAACGAGTGCG-CTTGCTCCGATAATCGCTCCCG--------------------------
--------------------------GCCCGGCAACGTATATCGGCCGCCTAATAGG---
------------------------------------------------------------
------------------------------------------------------------
------------------------------------------------------------
------------------------------------------------------------
------------------------------------------------------------
------------------------------------------------------------
-----------------------------------------------CCCGGGGCACTTT
ACCTTGAG--GAAATGCGAGAGCTCAAATCAGGTCAACTA---TGGACCCGCT-------
--------------------------------GTGAA-GCCTGT-AGCAAGGAACAATAC
AATAGGCCTCTGAGG---------CTATGGTACGCTGC----------------------
------------------------------------------------------------
-----------------------------------------AGAGATA-TGGTCAATAGG
GGGGATCGGGGTCGGCCAGATGGCAGGGGTAGGGGTGAAATCCGATGATCCTTGCCAGCT
GAACTAGAGCGAAAGCAGCC-GACAAGTACCCTTTCTTTGATCAAGAACGAAAGTCTGGG
GATCGAAGATGAT-----------------------------------------------
------------------------------------------------------------
------------------------------------------------------------
------------------------------------------------------------
------------------------------------------------------------
------------------------------------------------------------
------------------------------------------------------------
------------------------------------------------------------
------------------------------------------------------------
------------------------------------------------------------
------------------------------------------------------------
------------------------------------------------------------
------------------------------------------------------------
------------------------------------------------------------
------------------------------------------------------------
------------------------------------------------------------
------------------------------------------------------------
---CAGATACCATCGTAGTCCAGACCCTAAATGCTGCCGACCATGGATGGGCCTA-AGTC
CATCC------CGACCCGGCCCGCACCTTGT--------------GAGAAATCATCAAGT
GTTTGGGCTCCGGGGGGAGTATGGTCGCAAGACTGAAACT--------------------
------------------------------------------------------------
------------------------------------------------------------
------------------------------------------------------------
------------------------------------------------------------
------------------------------------------------------------
------------------------------------------------------------
------------------------------------------------------------
------------------------------------------------------------
------------------------------------------------------------
------------------------------------------------------------
------------------------------------------------------------
------------------------------------------------------------
------------------------------------------------------------
---------------------------------------------------------TAA
AGGAATTGACGGAAGAG-CACACAAGGAGT------------------------------
------------------------------------------------------------
------------------------------------------------------------
------------------------------------------------------------
------------------------------------------------------------
----------------------------GGAGCCTGCGGCT-------------------
------------------------------------------------------------
------------------------------------------------------------
------------------------------------------------------------
------------------------------------------------------------
------------------------------------------------------------
------------------------------------------------------------
------------------------------------------------------------
------------------------------------------------------------
------------------------------------------------------------
------------------------------------------------------------
------------------------------------------------------------
------------------------------------------------------------
------------------------------------------------------------
------------------------------------------------------------
------------------------------------------------------------
------------------------------------------------------------
------------------------------------------------------------
------------------------------------------------------------
------------------------------------------------------------
------------------------------------------------------------
------------------------------------------------------------
------------------------------------------------------------
------------------------------------------------------------
------------------------------------------------------------
------------------------------------------------------------
--------------------------------------TAATTTGACTCAACACGGGAAA
ACTCACATTGGCAAGAGAGGGGTAAGATGCCCGGCCCCGATGGCAAGGCAAGA--TTCCC
TCAGTGGTGGTGCATGGTCGT---------------------------------------
------------------------------------------------------------
------------------------------------------------------------
------------------------------------------------------------
------------------------------------------------------------
------------------------------------------------------------
------------------------------------------------------------
------------------------------------------------------------
------------------------------------------------------------
---------TCTTAGTTCGTGGA-GTGATTTGTCTGGTCTATTCCGCTAACGAGCAAGAT
CCCGACTTCTGGTTGTTGCCG--TCTAT--GTGCG----CGCTGGT--GATGCATCTGGG
GGGCCAATCGGGCTCGGTCCTGCACC-ACAGGTACTTTGAACCACG--------------
----CACCTGGTTCCCCCAGAACTGCCACGCAACAGGGGCAATCCGAGTGGGCACGCTGA
GTGCGCTACTCGTTAAACTCTTCTTACATACGTTG---TGGTCTTCGGACCAAACCC---
------------------------------------------------------------
--------------------------------GGGCCTGCA-GGGCAGCCCTAC---TTT
CAAGTAGGTG-CAAC--GGGTCAATAACAGGT----------------------------
------------------------------------------------------------
------------------------------------------------------------
------------------------------------------------------------
------------------------------------------------------------
------------------------------------------------------------
------------------------------------------------------------
------------------------------------------------------------
------------------------------------------------------------
------------------------------------------------------------
------------------------------------------------------------
------------------------------------------------------------
-----------------------CAGT-GATGCCCT------------------------
------------------------------------------------------------
------------------------------------------------------------
------------------------------------------------------------
------------------------------------------------------------
------------------------------------------------------------
------------------------------------------------------------
-------------TAGATGC--CTTTGGCTGCACGCGCGCTACAATGGGGAAAG--CAAC
GGGTTACGGCGTCTAACGACGTCTTTGGAG------------------------------
-CCTTTCACG-----AGGCACTAGG-TCGTGAACCCGGCCAATATTCCTCTT-AACTGGG
ACTGCACCAAGTATCTTGGTAC------GCGCGAACGTGGAATTTCTAGTACCCGCC-GT
TCATCAGACGGTGTGGATTCTGTCCCTGCTCT----------------------------
------------------------------------------------------------
------------------------------------------------------------
------------------------------------------------------------
------------------------------------------------------------
------------------------------------------------------------
------------------------------------------------------------
------------------------------------------------------------
------------------------------------------------------------
-------------------------TTGTACACACCGCCCGTCGCTCCTACCGATTGAGC
TAATGGGTGAGCTAGGAGGACGCGAATACTGT----------------------------
------------------------------------------------------------
------------------------------------------------------------
------------------------------------------------------------
------------------------------------------------------------
------------------------------------------------------------
------------------------------------------------------------
------------------------------------------------------------
------------------------------------------------------------
------------------------------------------------------------
------------------------------------------------------------
------------------------------------------------------------
------------------------------------------------------------
------------------------------------------------------------
------------------------------------------------------------
------------------------------------------------------------
------------------------------------------------------------
------------------------------------------------------------
------------------------------------------------------------
------------------------------------------------------------
------------------------------------------------------------
------------------------------------------------------------
------------------------------------------------------------
------------------------------------------------------------
------------------------------------------------------------
------------------------------------------------------------
------------------------------------------------------------
------------------------------------------------------------
------------------------------------------------------------
------------------------------------------------------------
------------------------------------------------------------
------------------------------------------------------------
-------------------------TCGGTCTTTCAAGCCACACTTAACGAGGTGGCCGG
GCTATTCAATCAACACGGGGCAACCTGGAAACCGCCAATCCCT--GCGAACCCTTTGGCT
TAGAGGAAGGAGAAGTCGTAACAAGGTATCCGTAGGTGAACCTG
>Arcyria_denudata_AY643825
-------------------------------n----------------------------
------------------------------------------------------------
------------------------------------------------------------
----------GCCCATATGCGCCGTCGTCCGGC---------------------------
------------------------------------------------------------
------------------------------------------------------------
------------------------------------------------------TGA-TC
GG-ATAGA-CGCGGTAATTCTG-CTTGTAATACGTGT-TCACCGCCGGG-AGTGTGTCCG
GCCCTCACGGGCTGGGCTTCTCCACATTCCGGCT-GGAGT--CC-CAAGGC-ATCAATCC
CGCTCC-GGCGGGGGAGGAGTCCCCGGGAC------------------------------
------------------------------------------------------------
------------------------------------------------------------
------------------------------------------------------------
------------------------------------------------------------
AGA---AC-CACAGAAGG------------------------------------------
------------------------------------------------------------
------------------------CCTTCGAGGCCCTC--GTAGGCGCTGGGCTTCAGAC
CTATCA-ACTGTGGAGGCTGGGTAAGGTCCAGC-CTCGGTGATAACGGGTACAGAGGATC
AGGGTTCGGTCCTGGAGAGGTAGCCTGAGAGATAGCTACTACTTCTAAGGAAGGCAGCAG
GCGCGCAACGTTCCCAATGGTTTG-------CCACCCCGTG---GCTGAGGACGTTAAGG
GACATAACAATGCCCTGCCC--TTTC----GGGCGGGGTAATTGT-AATGGGGGCGTTCT
AAACC-CCCCACCG-------AGTAGCAATTGGAGGACAAGTCTGGTTAAACTTCAGCCA
GATGTCGGAATTGCAGGACGATGACTTGTAATAAGGGTCATTTTTTTGTGGTAACGGCAG
AAAGTGGGGATAAGCTCCCATTGTACAGTTGTAAATTGCAGGGAACACCAGACATGGTTC
AGCTACCGCGGCTGTCGGGAAACTAACCGGCAGTGCAGCAGGCTTCGGCCGGATGGTAAC
AACGCTGTTCCAGGGGCCGGTCCGGCCACGCCACCTCCGGGTGGCACCACTCTGGTCAAT
CTGCAGCCAAGCCACTATACCCTCCGGGGAGTGTGGAAGGTTCAGAGACTATAATCGACT
GGGCGCAAGCTTAAGGAATAGTCCACTCCCCCCAGTAATGGGGCCGGCAAAAGTATGGGG
GGGTAGCTCCCTTCAGAGGCATGCCGGGTCCTTCGAAGTACGGGTCTATTGGTAATCCCC
GTGCGAGGTATAGGATGGTAGCAAGG----------------------------------
------------------------------------------------------------
------------------------------------------------------------
------------------------------------------------------------
------------------------------------------------------------
------------------------------------------------------------
------------------------------------------------------------
------------------------------------------------------------
------------------------------------------------------------
------------------------------------------------------------
------------------------------------------------------------
--------------------------------------------------------GCCA
GCACCCGCG---------------------------------------------------
------------------------------------------------------------
------------------------------------------------------------
------------------------------------------------------------
------------------------------------------------------------
------------------------------------------------------------
------------------------------------------------------------
------------------------------------------------------------
------------------------------------------------------------
------------------------------------------------------------
------------------------------------------------------------
------------------------------------------------------------
------------------------------------------------------------
------------------------------------------------------------
------------------------------------------------------------
------------------------------------------------------------
------------------------------------------------------------
------------------------------------------------------------
------------------------------------------------------------
------------------------------------------------------------
--------------------------------------GTAATTCCAGCTCCAATAGCAT
CTAATTGAGTTGTTGCAGTTAAAACGCTCGTAGTCCGA-CACGG--CACTGCTGACCCGC
TGAG--------------------TAGCTTCCCGCGTGGGTGCCGGCTCCGGCCGGCGCG
AAGCCCCACGG-GCGGTCCAAAGGCGATTAGGCGGGG-----------------------
-------------------------------------------------------CCATA
ATGGCGTGGGCGGGCGGGTCCGGCCGCCCGCC----------------------------
------------------------------------------------------------
------------------------------------------------------------
------------------------------------------------------------
------------------------------------------------------------
------------------------------------------------------------
-----------------------------------------------CGTTAGCCGTTTT
ACTTTGAG--GAAATGTGAGCGCTCTAAGCAGCCCCTTG----GGGGC------------
--------------------------------CTGAA-GCCTGC-AGCAAAGAATAATAC
AACACGGTTCTCGTGGCG------TATTGGTACGGCGCCGC-------------------
------------------------------------------------------------
-----------------------------------------CGGGCAA-TGATCAATAGG
GGAGATCGGGGTCGGCCTCATGGCGGGGGTAGGGGTGAAATCCGTTGATCCTCGCCAGGA
GAACAAGAGCGAAAGCAGCC-GACAAGTACTCTTTCTTTGATCAAGAACGAAAGTCTGGG
GATCGAAGATGAT-----------------------------------------------
------------------------------------------------------------
------------------------------------------------------------
------------------------------------------------------------
------------------------------------------------------------
------------------------------------------------------------
------------------------------------------------------------
------------------------------------------------------------
------------------------------------------------------------
------------------------------------------------------------
------------------------------------------------------------
------------------------------------------------------------
------------------------------------------------------------
------------------------------------------------------------
------------------------------------------------------------
------------------------------------------------------------
------------------------------------------------------------
---CAGATACCATCGTAGTCCAGACCCTAAATGTTGCCGACCATGGATGGGCGCC-AGTC
CGTCC------CGACCCGGCCCGCACCTTGT--------------GAGAAATCAT-AAGT
GTTTGGGCTCCGGGGGGAGTATGGTCGCAAGACTGAAACT--------------------
------------------------------------------------------------
------------------------------------------------------------
------------------------------------------------------------
------------------------------------------------------------
------------------------------------------------------------
------------------------------------------------------------
------------------------------------------------------------
------------------------------------------------------------
------------------------------------------------------------
------------------------------------------------------------
------------------------------------------------------------
------------------------------------------------------------
------------------------------------------------------------
---------------------------------------------------------TAA
AGGAATTGACGGAAGAG-CACACAAGGAGT------------------------------
------------------------------------------------------------
------------------------------------------------------------
------------------------------------------------------------
------------------------------------------------------------
----------------------------GGAGCCTGCGGCC-------------------
------------------------------------------------------------
------------------------------------------------------------
------------------------------------------------------------
------------------------------------------------------------
------------------------------------------------------------
------------------------------------------------------------
------------------------------------------------------------
------------------------------------------------------------
------------------------------------------------------------
------------------------------------------------------------
------------------------------------------------------------
------------------------------------------------------------
------------------------------------------------------------
------------------------------------------------------------
------------------------------------------------------------
------------------------------------------------------------
------------------------------------------------------------
------------------------------------------------------------
------------------------------------------------------------
------------------------------------------------------------
------------------------------------------------------------
------------------------------------------------------------
------------------------------------------------------------
------------------------------------------------------------
------------------------------------------------------------
--------------------------------------TAATTTGACTCAACACGGGGAA
ACTCACGAGTGCAAGAGAAGGTTACGAAGCCCGGCATGAATTGCCTGGCT-GA--TTCTT
TCAGTGGTGGTGCATGGTCGT---------------------------------------
------------------------------------------------------------
------------------------------------------------------------
------------------------------------------------------------
------------------------------------------------------------
------------------------------------------------------------
------------------------------------------------------------
------------------------------------------------------------
------------------------------------------------------------
---------TCTTAGTTCGTGGA-GTGATTTGTCTGGTCTATTCCGCTAACGAGCGAGAA
CCCGCTTTCTGGATGTTGCGT--GGCTGGGGCTGG----TGGGGTTG-CGGCAGGCGGGC
GGTACATTGGGCCTCCGGGCCCTCTAAGG-CTGCTCGCAGGCGGGCCCTCCGTTTAATGT
CCCGGCTTG---------------------------------------------------
------------------------------------------------------------
------------------------------------------------------------
-------------------------------CGGTCCTGCA-AAGTGTCCCGGC---GAC
AAGCCGGGGC-TCT---GGGTCAATAACAGGT----------------------------
------------------------------------------------------------
------------------------------------------------------------
------------------------------------------------------------
------------------------------------------------------------
------------------------------------------------------------
------------------------------------------------------------
------------------------------------------------------------
------------------------------------------------------------
------------------------------------------------------------
------------------------------------------------------------
------------------------------------------------------------
-----------------------CAGT-GATGCCCT------------------------
------------------------------------------------------------
------------------------------------------------------------
------------------------------------------------------------
------------------------------------------------------------
------------------------------------------------------------
------------------------------------------------------------
-------------TAGATGT--ACTCGGCTGCACGCGCGCTACAATGGGAGGTC--CAAC
GGGTCC------------------------------------------------------
-TCAGCCCC-------TATCGGGTG-CGGAGAATCCTAGTAAAGCCGCCCTC-ATCTGGG
ATTGCAGCATGTAATATGCG--------GCATGAACATGGAATTTCTAGTAGTCACG-GT
TCACCAGACCGTGGCGATTCTGTCCCTGCTCT----------------------------
------------------------------------------------------------
------------------------------------------------------------
------------------------------------------------------------
------------------------------------------------------------
------------------------------------------------------------
------------------------------------------------------------
------------------------------------------------------------
------------------------------------------------------------
-------------------------TTGTACACACCGCCCGTCGCTCCTACCGATTGGGC
TGCGGGGTGAAATAGGAGGACCCCTAAGCTGCT---------------------------
------------------------------------------------------------
------------------------------------------------------------
------------------------------------------------------------
------------------------------------------------------------
------------------------------------------------------------
------------------------------------------------------------
------------------------------------------------------------
------------------------------------------------------------
------------------------------------------------------------
------------------------------------------------------------
------------------------------------------------------------
------------------------------------------------------------
------------------------------------------------------------
------------------------------------------------------------
------------------------------------------------------------
------------------------------------------------------------
------------------------------------------------------------
------------------------------------------------------------
------------------------------------------------------------
------------------------------------------------------------
------------------------------------------------------------
------------------------------------------------------------
------------------------------------------------------------
------------------------------------------------------------
------------------------------------------------------------
------------------------------------------------------------
------------------------------------------------------------
------------------------------------------------------------
------------------------------------------------------------
------------------------------------------------------------
------------------------------------------------------------
------------------------------------------------------------
--------CGTCCGGCACTTGTGCCGGACAGCGGGTAATCCCT--TTGAACCCTGTGGTC
TAGAGGAAGGAGAAGTCGTAACA
>Arcyria_globosa_JX481282
-----AACCTGGTTGATCCTGCCAGTAT-CATATGCTTGTTCCAAAGATT-AAGCCATGC
ATGCTTA---GATAATCT-CGT----ATCTCT----------------------------
-------------------------CAGAAATCTGCGAACGGCTCCGTATATCTGTTACA
A-CTCGTCGCGCCCTAAGAAAGGTTGG---------------------------------
------------------------------------------------------------
------------------------------------------------------------
------------------------------------------------------TAA-GC
GC-ATATGGTTCGGTAATTCTG-TCAGTAATACGTGT-ACCCGCAAGGCGCCCTGGCATA
CGGTTTTTCCCTTAGAGATCTATGCAGCTAACAG-GGCGGACTCTAGAACTACCAGCGAC
TCCGGTCGTTTGGGAAAAAGCTAGAGTGTT------------------------------
------------------------------------------------------------
------------------------------------------------------------
------------------------------------------------------------
------------------------------------------------------------
CCTC--AC-CAGG-----------------------------------------------
------------------------------------------------------------
----------------------------CAC--GGGG---AGAGCCGGGAAATTTCAGAC
CTATCA-ACT-AGAGAACCATGCAGTGTACGGT-TTTGGTGGTAACGGGTACAGAGGATC
AGGGTTCGATCCTGGAGAGGTAGCCTGAGAGATCGCTACTACTTCTAAGGAAGGCAGCAG
GCGCGCAACGTTCCCAATGGGGGGGTT----AAAGGTTC-----CCTGAGGACGTGACGG
AATATATCGATGCTCCGGCC--TTTA---GGTCGTGGGCAATTGA-AATGGGGGGATTTT
AAATCCTACTACCG-------AGTAACGATTGGAGGACAAGTCTGGT-------------
------------------------------------------------------------
------------------------------------------------------------
------------------------------------------------------------
------------------------------------------------------------
------------------------------------------------------------
------------------------------------------------------------
------------------------------------------------------------
------------------------------------------------------------
------------------------------------------------------------
------------------------------------------------------------
------------------------------------------------------------
------------------------------------------------------------
------------------------------------------------------------
------------------------------------------------------------
------------------------------------------------------------
------------------------------------------------------------
------------------------------------------------------------
------------------------------------------------------------
--------------------------------------------------------GCCA
GCACCCGCG---------------------------------------------------
------------------------------------------------------------
------------------------------------------------------------
------------------------------------------------------------
------------------------------------------------------------
------------------------------------------------------------
------------------------------------------------------------
------------------------------------------------------------
------------------------------------------------------------
------------------------------------------------------------
------------------------------------------------------------
------------------------------------------------------------
------------------------------------------------------------
------------------------------------------------------------
------------------------------------------------------------
------------------------------------------------------------
------------------------------------------------------------
------------------------------------------------------------
------------------------------------------------------------
------------------------------------------------------------
--------------------------------------GTAATTCCAGCTCCGATAGCAT
CTAATTAAGTTGTTGCAGTTAAAACGCTCGTAGTCGAA-AATCG--GGTTATGGAGGGTC
ATGCCAGGCACGGTCT--------CAGTAGGCACGCCTCAACGCTACCGAACGATCGTGC
CTTTGCGCTTC-CGCATATAACCCGTTAACGACCGGGGGGCT------------------
-------------------------CACCGTGCAGCCGGAGCTCTGCTCCGTGCATGCCG
A-----------------------------------------------------------
------------------------------------------------------------
------------------------------------------------------------
------------------------------------------------------------
------------------------------------------------------------
------------------------------------------------------------
-----------------------------------------------CCTCCGGTCCGTT
ACCTTGAG--AAAATGTAGTAGCTCAAATAAGGGCAGCTT---GCGGCCCT---------
--------------------------------ATGAA-ACCTGT-AGCAAGGAATAAGCA
AAGACGCCTCGGCG----------CTTTGGTAAGCTGC----------------------
------------------------------------------------------------
-----------------------------------------AGAGTAA-TGATCGATAGG
GGAGATCGGGGCAGGCCACATGGTCGGGGTAGGGGTGAAATCCGATGATCCTGGCCAGGT
GAACCAAAGCGAAAGCAGCC-TGCAAGTACTCTTTCTTTGATCAAGAACGAAAGTCTGGG
GATCGAAGATGAT-----------------------------------------------
------------------------------------------------------------
------------------------------------------------------------
------------------------------------------------------------
------------------------------------------------------------
------------------------------------------------------------
------------------------------------------------------------
------------------------------------------------------------
------------------------------------------------------------
------------------------------------------------------------
------------------------------------------------------------
------------------------------------------------------------
------------------------------------------------------------
------------------------------------------------------------
------------------------------------------------------------
------------------------------------------------------------
------------------------------------------------------------
---CAGATACCATCGTAGTCCAGACCCTAAATGCTGCCGACCATGGATGGACGAC-AGTC
CATCC------TGACCCTGCCCGCACCTTGT--------------AAGAAATTATAAAGT
GTATGGGCTCCGGGGGGAGTATGGTCGCAAGACTGAAACT--------------------
------------------------------------------------------------
------------------------------------------------------------
------------------------------------------------------------
------------------------------------------------------------
------------------------------------------------------------
------------------------------------------------------------
------------------------------------------------------------
------------------------------------------------------------
------------------------------------------------------------
------------------------------------------------------------
------------------------------------------------------------
------------------------------------------------------------
------------------------------------------------------------
---------------------------------------------------------TAA
AGGAATTGACGGAAGAG-CACACAAGGAGT------------------------------
------------------------------------------------------------
------------------------------------------------------------
------------------------------------------------------------
------------------------------------------------------------
----------------------------GGAGCCTGCGGCT-------------------
------------------------------------------------------------
------------------------------------------------------------
------------------------------------------------------------
------------------------------------------------------------
------------------------------------------------------------
------------------------------------------------------------
------------------------------------------------------------
------------------------------------------------------------
------------------------------------------------------------
------------------------------------------------------------
------------------------------------------------------------
------------------------------------------------------------
------------------------------------------------------------
------------------------------------------------------------
------------------------------------------------------------
------------------------------------------------------------
------------------------------------------------------------
------------------------------------------------------------
------------------------------------------------------------
------------------------------------------------------------
------------------------------------------------------------
------------------------------------------------------------
------------------------------------------------------------
------------------------------------------------------------
------------------------------------------------------------
--------------------------------------TAATTTGACTCAACACGGGAAA
ACTCACGGAGGCAAGAGAGGGGTACGATGCTCGGCCTGAATGGCTAGGCAAGA--TTCCC
TCAGTGGTGGTGCATGGTCGT---------------------------------------
------------------------------------------------------------
------------------------------------------------------------
------------------------------------------------------------
------------------------------------------------------------
------------------------------------------------------------
------------------------------------------------------------
------------------------------------------------------------
------------------------------------------------------------
---------TCTTAGTTCGTGGA-GTGATTTGTCTGGTCTATTCCGCTAACGAGCAAGAT
CCCGCCTTCTGAACGTTACGC--GCTGTATACGCC----CGGTGGCAGTTTTTGGCTGAG
CTGCCCGGTCGCAAGACCGGGTTTGAGCGGCTGAGCTCTGCCC-----------------
--------------TAGGTAATCGGGAACAGAGATGGTCACTGGCTAACCCTGGTGATCG
GACCTACCCCCGTTTTTTACA-----------------------------------TGCG
AGAACAGTATATA-----------------------------------------------
-------------------------------TGAACCCTCA-AGGTTTACCTGC----AT
CAAGCAGGCA-TAACC-GGGTCAATAACAGGT----------------------------
------------------------------------------------------------
------------------------------------------------------------
------------------------------------------------------------
------------------------------------------------------------
------------------------------------------------------------
------------------------------------------------------------
------------------------------------------------------------
------------------------------------------------------------
------------------------------------------------------------
------------------------------------------------------------
------------------------------------------------------------
-----------------------CAGT-GATGCCCT------------------------
------------------------------------------------------------
------------------------------------------------------------
------------------------------------------------------------
------------------------------------------------------------
------------------------------------------------------------
------------------------------------------------------------
-------------TAGATGC--CTTTGGCTGCACGCGCGCTACAATGGGGAGAG--CACC
GGGTTTCATCAG------------------------------------------------
-CCTCGA-----------AAGAGCG-CAGAAAATCCTGCTAATACTCCTCTT-AACCGGG
ACTGCGTCGAGTATCTCGACT-------ATACGAACGTGGAATTTCTAGTACTCGTT-GT
TCACTAGATAGCGGGGATTCTGTCCCTGCTCT----------------------------
------------------------------------------------------------
------------------------------------------------------------
------------------------------------------------------------
------------------------------------------------------------
------------------------------------------------------------
------------------------------------------------------------
------------------------------------------------------------
------------------------------------------------------------
-------------------------TTGTACACACCGCCCGTCGCTCCTACCGATTGAGC
TAAGGGATGAGCTAAGGGGACTCAAAATGCCGG---------------------------
------------------------------------------------------------
------------------------------------------------------------
------------------------------------------------------------
------------------------------------------------------------
------------------------------------------------------------
------------------------------------------------------------
------------------------------------------------------------
------------------------------------------------------------
------------------------------------------------------------
------------------------------------------------------------
------------------------------------------------------------
------------------------------------------------------------
------------------------------------------------------------
------------------------------------------------------------
------------------------------------------------------------
------------------------------------------------------------
------------------------------------------------------------
------------------------------------------------------------
------------------------------------------------------------
------------------------------------------------------------
------------------------------------------------------------
------------------------------------------------------------
------------------------------------------------------------
------------------------------------------------------------
------------------------------------------------------------
------------------------------------------------------------
------------------------------------------------------------
------------------------------------------------------------
------------------------------------------------------------
------------------------------------------------------------
------------------------------------------------------------
------------------------ACGCGTCTTTCAACTCGC-AACAAT--GGCGGGCGG
GCGTAAA--TCAAC-GGGGGCAACCCACGTCCTGATAACCTCT--GCGAATCTTTTGGCT
TAGAGGAAGGAGAAGTCGTAACAAGGTATCCGTAG
>Arcyria_marginoundulata_JX481283
-------------------------------n----------------------------
------------------------------------------------------------
------------------------------------------CTCCGTATATCTGTTGTC
A-CCAGTAACGCCCTTATGCGCCGTCGTCCGGCA--------------------------
------------------------------------------------------------
------------------------------------------------------------
------------------------------------------------------TGT-AC
GG-ATAGA-CGCGGTAATTCTG-CTTGTAATACGTGTGAAACCGCCGTGCGGCTGTGTCG
CCCCTCACGGGGTGA--CTCGCCCTATACCGGCT-GGGGT--CC-CAAGGCAACCAATCC
CGCCCTAGGCGGGGGTGGAGTCCGAGGGAC------------------------------
------------------------------------------------------------
------------------------------------------------------------
------------------------------------------------------------
------------------------------------------------------------
AGC---AC-CAAAGAAGG------------------------------------------
------------------------------------------------------------
------------------------CCCTCGAGGCTCTC--TTAAGCGCTGGGCTTCAGAC
CTATCA-ACTGTGGAGGCTGGGTAAGGTCCAGC-CTCGGTGATAACGGGTACAGAGGATC
AGGGTTCGGTCCTGGAGAGGTAGCCTGAGAGATAGCTACTACTTCTAAGGAAGGCAGCAG
GCGCGCAACGTTCCCAATGGTTCC-------ACACCTAGTG---GCTGAGGACGTTAAGG
GACATAACAATGCCTTGCCC-GATAA----GGGCGGGGTAATTGT-AATGGGGGCGTTCT
AAACC-CCCCACCG-------AGTAGCAATTGGAGGACAAGTCTGGT-------------
------------------------------------------------------------
------------------------------------------------------------
------------------------------------------------------------
------------------------------------------------------------
------------------------------------------------------------
------------------------------------------------------------
------------------------------------------------------------
------------------------------------------------------------
------------------------------------------------------------
------------------------------------------------------------
------------------------------------------------------------
------------------------------------------------------------
------------------------------------------------------------
------------------------------------------------------------
------------------------------------------------------------
------------------------------------------------------------
------------------------------------------------------------
------------------------------------------------------------
--------------------------------------------------------GCCA
GCACCCGCG---------------------------------------------------
------------------------------------------------------------
------------------------------------------------------------
------------------------------------------------------------
------------------------------------------------------------
------------------------------------------------------------
------------------------------------------------------------
------------------------------------------------------------
------------------------------------------------------------
------------------------------------------------------------
------------------------------------------------------------
------------------------------------------------------------
------------------------------------------------------------
------------------------------------------------------------
------------------------------------------------------------
------------------------------------------------------------
------------------------------------------------------------
------------------------------------------------------------
------------------------------------------------------------
------------------------------------------------------------
--------------------------------------GTAATTCCAGCTCCAATAGCAT
CTAATTGAGTTGTTGCAGTTAAAACGCTCGTAGTCAGA-GTCGG--CCGGCGCCGACCCT
GCGAGTAGG---------------CAGCCCTCCGGTTCGCCGGAGAGCCACCCAAAGCAG
GGAACTGGCCCGGTCATAATGGT-------------------------------------
------------------------------------------------------------
------------GTCAGGCGGGTCCGCCCGCC----------------------------
------------------------------------------------------------
------------------------------------------------------------
------------------------------------------------------------
------------------------------------------------------------
------------------------------------------------------------
-----------------------------------------------TGCTCGCCGTTTT
ACTTTGAG--GAAATGTGAGCGCTCTAAGCAGCCCCTTA----GGGGC------------
--------------------------------CTGAA-GCCTGC-AGCAAAGAATAATAC
AACACGGCCA-CGTGGTG------TATTGGTTACGCGCCGC-------------------
------------------------------------------------------------
-----------------------------------------ATGGCAA-TGATCAATAGG
GGAGATCGGGGCCGGCCTCATGGCGGGGGTAGGGGTGAAATCCGTTGATCCTCGCCAGGA
GAACAAAAGCGAAAGCAGCC-GGCAAGTACTCTTTCTTTGATCAAGAACGAAAGTCTGGG
GATCGAAGATGAT-----------------------------------------------
------------------------------------------------------------
------------------------------------------------------------
------------------------------------------------------------
------------------------------------------------------------
------------------------------------------------------------
------------------------------------------------------------
------------------------------------------------------------
------------------------------------------------------------
------------------------------------------------------------
------------------------------------------------------------
------------------------------------------------------------
------------------------------------------------------------
------------------------------------------------------------
------------------------------------------------------------
------------------------------------------------------------
------------------------------------------------------------
---CAGATACCATCGTAGTCCAGACCCTAAATGCTGCCGACCATGGATGGGCATC-AGTC
CGTCC------CGACCCGGCCCGCACCTTGT--------------GAGAAATCAT-AAGT
GTTTGGGCTCCGGGGGGAGTATGGTCGCAAGACTGAAACT--------------------
------------------------------------------------------------
------------------------------------------------------------
------------------------------------------------------------
------------------------------------------------------------
------------------------------------------------------------
------------------------------------------------------------
------------------------------------------------------------
------------------------------------------------------------
------------------------------------------------------------
------------------------------------------------------------
------------------------------------------------------------
------------------------------------------------------------
------------------------------------------------------------
---------------------------------------------------------TAA
AGGAATTGACGGAAGAG-CACACAAGGAGT------------------------------
------------------------------------------------------------
------------------------------------------------------------
------------------------------------------------------------
------------------------------------------------------------
----------------------------GGAGCCTGCGGCC-------------------
------------------------------------------------------------
------------------------------------------------------------
------------------------------------------------------------
------------------------------------------------------------
------------------------------------------------------------
------------------------------------------------------------
------------------------------------------------------------
------------------------------------------------------------
------------------------------------------------------------
------------------------------------------------------------
------------------------------------------------------------
------------------------------------------------------------
------------------------------------------------------------
------------------------------------------------------------
------------------------------------------------------------
------------------------------------------------------------
------------------------------------------------------------
------------------------------------------------------------
------------------------------------------------------------
------------------------------------------------------------
------------------------------------------------------------
------------------------------------------------------------
------------------------------------------------------------
------------------------------------------------------------
------------------------------------------------------------
--------------------------------------TAATTTGACTCAACACGGGGAA
ACTCACGAGTGCAAGAGAGGGGTATGAAGCCCGGCATGAATTGCCTGGCT-GA--TTCCT
TCAGTGGTGGTGCATGGTCGT---------------------------------------
------------------------------------------------------------
------------------------------------------------------------
------------------------------------------------------------
------------------------------------------------------------
------------------------------------------------------------
------------------------------------------------------------
------------------------------------------------------------
------------------------------------------------------------
---------TCTTAGTTCGTGGA-GTGATTTGTCTGGTCTATTCCGCTAACGAGCGAGAA
CCCGCCTTCTGGTTGTTGCCC--TCCC--TACGCC----GAGCTTCTGCGGCTGTCCCTC
GGTACATCGATCCTTCGGGGTCCCTAAGGCCTTGGGGTAGCGGGTCGCTCACTATGTGTG
TAGGGGGCG---------------------------------------------------
------------------------------------------------------------
------------------------------------------------------------
--------------------------------GGGCCTGCA-AGGTGTCCCGGC---GAT
AAGCCGGGGA-TAT---GGGTCAATAACAGGT----------------------------
------------------------------------------------------------
------------------------------------------------------------
------------------------------------------------------------
------------------------------------------------------------
------------------------------------------------------------
------------------------------------------------------------
------------------------------------------------------------
------------------------------------------------------------
------------------------------------------------------------
------------------------------------------------------------
------------------------------------------------------------
-----------------------CAGT-GATGCCCT------------------------
------------------------------------------------------------
------------------------------------------------------------
------------------------------------------------------------
------------------------------------------------------------
------------------------------------------------------------
------------------------------------------------------------
-------------TAGATGT--ACTCGGCTGCACGCGCGCTACAATGGGAGGCA--CAAC
GGGTCT------------------------------------------------------
-TCCGCACC-------TATAGGTCG-CGGAGAATCCTTGTAACGCCGCCCAC-ATCCGGG
ATTGCAGCATGTAATATGCT--------GCATGAACACGGAATTTCTAGTAGTCACG-GT
TCACCAGACCGTGGCGATTCTGTCCCTGCTCT----------------------------
------------------------------------------------------------
------------------------------------------------------------
------------------------------------------------------------
------------------------------------------------------------
------------------------------------------------------------
------------------------------------------------------------
------------------------------------------------------------
------------------------------------------------------------
-------------------------TTGTACACACCGCCCGTCGCTCCTACCGATTGGGC
TGCGGGGTGAAATAGGAGGACCCCCAGAATATT---------------------------
------------------------------------------------------------
------------------------------------------------------------
------------------------------------------------------------
------------------------------------------------------------
------------------------------------------------------------
------------------------------------------------------------
------------------------------------------------------------
------------------------------------------------------------
------------------------------------------------------------
------------------------------------------------------------
------------------------------------------------------------
------------------------------------------------------------
------------------------------------------------------------
------------------------------------------------------------
------------------------------------------------------------
------------------------------------------------------------
------------------------------------------------------------
------------------------------------------------------------
------------------------------------------------------------
------------------------------------------------------------
------------------------------------------------------------
------------------------------------------------------------
------------------------------------------------------------
------------------------------------------------------------
------------------------------------------------------------
------------------------------------------------------------
------------------------------------------------------------
------------------------------------------------------------
------------------------------------------------------------
------------------------------------------------------------
------------------------------------------------------------
------------------------------------------------------------
--------CTGCGCGCCGGCTCGCCCGGCCGTGGGCAATCTC---TTGAACCCTGTGGTC
TAGAGGAAGGAGAAGTCGTAACA
>Arcyria_stipata_EF513170
-------------------------------n------------AAGATT-AAGCCATGC
ATGTTACTA-GTCTCCCG-ATA----ATCT------------------------------
--------------------------CGAAATCTGCGAACGGCTCCGTATATCTGTTAAA
A-CCCGCCGCCCCTTATGAAAGGTTGG---------------------------------
------------------------------------------------------------
------------------------------------------------------------
------------------------------------------------------TAA-GC
GG-ATATAGCTCGGTAATTCTG-TCAGTAATACGTGT-ACGTGCAGCGCCCCCTGGAGGT
TAGAGCCCGACGGCCACCTTAAGGATGGGGGGAA-TCCGG--AGGTCACCACTCGCGATG
AGTCGGCCGGAT------------------------------------------------
------------------------------------------------------------
------------------------------------------------------------
------------------------------------------------------------
------------------------------------------------------------
AGT---AC-CAGA-----------------------------------------------
------------------------------------------------------------
-------------------------GCTTTG--GGCC---TGAGGCGGCGGTTTTCAGAC
CTATCA-ACT-AGAGGCCTGCGTAGTGTGCAGG-CCTGGTTTTAACGGGTACAGAGGATC
AGGGTTCGGTCCTGGAGAGGTAGCCCGAGATATCGCTACTACTTCTAAGGAAGGCAGCAG
GCGCGCAACGTTCCCAATGGGGCTCC-----CTGTAGT------CCTGAGGACGTAACGG
AACATACCTATGCCCCGCCC--TTAG----GGCTGGGGTAATCGG-AATGGGGGGATTTT
AAACCCTACTACCG-------AGTAACAATTAGAGGACAAGTCTGGT-------------
------------------------------------------------------------
------------------------------------------------------------
------------------------------------------------------------
------------------------------------------------------------
------------------------------------------------------------
------------------------------------------------------------
------------------------------------------------------------
------------------------------------------------------------
------------------------------------------------------------
------------------------------------------------------------
------------------------------------------------------------
------------------------------------------------------------
------------------------------------------------------------
------------------------------------------------------------
------------------------------------------------------------
------------------------------------------------------------
------------------------------------------------------------
------------------------------------------------------------
--------------------------------------------------------GCCA
GCACCCGCGAAAACCTAATGGAATCCGCGGTAAAAGTGTACGTGAACCGTATGCTAGTCC
GGAGGGCAACCTCTACCCGGTGAATCGACATCGGTTAACCAGGGCGACATCATCAAATTG
CGGGAAGTCCGTAAAGCCCTCACTACCAAGCGCCCAAAGAAAATGCGGGCGTGGCACGGT
TAATGGCCTGTGGTACGGTAAAAACGTGAGGGATACCTGGGAAGCGCGCTTAGTCCGGCA
TGGGAGAAACGCTGAATTGATTCTTGCCCACAGCGTCCGCACTGCAGACTTCGCAATAAA
GCGCAGAACAGGTTGCTTTGGCAGCATAAAAGTCGGTAATCCGCAGCCAAGCTCTTGTCG
GTCGGTATGCACGGGGTCCGAAGTCCGGCCCCTGGTAAGTCAACTCCGGCCCACATGGGT
GCAGTTCAGAGACTAGATGGTGATGGGGGTGGTGTAGGTGGTCCGCCTAGCTCAAGGTTC
TCTTGAGGCCGGGGGGGAGGAGTGTCCTCTCAGACCGCTGATAGCTCATAAGGTATAGTC
CACCCCCGGTGAAAGCCGGCCCGGAGAATCGCCTCCAGAGGGGGAGTCTAGCCAACTCCC
GGATCATAGTG-------------------------------------------------
------------------------------------------------------------
------------------------------------------------------------
------------------------------------------------------------
------------------------------------------------------------
------------------------------------------------------------
------------------------------------------------------------
------------------------------------------------------------
------------------------------------------------------------
------------------------------------------------------------
--------------------------------------GTAATTCCAGCTCTAATAGCAT
CTAATTAAGTTGTTGCAGTTAAAACGCTCGTAGTTCGA-ATACG--TTTCGGGTAAGCGG
TCCGTCTGCGGGGCTTTAAGG---AGGCGCTTCGGTGCTTCTCGGCCTTTGCTTAAACGC
GCACGCCCGA-------TCCGATAGTGATCCG----------------------------
-------------------------GACCCGGCTACGTATAACAGCCGCCTAATAGG---
------------------------------------------------------------
------------------------------------------------------------
------------------------------------------------------------
------------------------------------------------------------
------------------------------------------------------------
------------------------------------------------------------
-----------------------------------------------TCC-GGGTAATTT
ACCTTGAG--TAAATGTTAGGGCTCAAATCAGGTCTT------TCGACCCGAATTTTATA
TTA-----------------------------GAGCG-ACCTGT-AGCAAGGAACGATAG
AATAGGCCTCGTGCCA--------GCTTGGTACGCTGC----------------------
------------------------------------------------------------
-----------------------------------------AGAGATA-TGGTCAATAGG
GGAGATCGGGGTCAGCCACATGGCAGGGGTAGGGGTGAAATCCGATGATCCTTGCTAGGT
GAACTAGAGCGAAAGCAGCT-GACAAGTACTCTTTCTTTGATCAAGAACGAAAGTCTGGG
GATCGAAGATGAT-----------------------------------------------
------------------------------------------------------------
------------------------------------------------------------
------------------------------------------------------------
------------------------------------------------------------
------------------------------------------------------------
------------------------------------------------------------
------------------------------------------------------------
------------------------------------------------------------
------------------------------------------------------------
------------------------------------------------------------
------------------------------------------------------------
------------------------------------------------------------
------------------------------------------------------------
------------------------------------------------------------
------------------------------------------------------------
------------------------------------------------------------
---CAGATACCATCGTAGTCCAGACCCTAAATGTTGCCGACCATGGATGGACCTA-AGTC
CATCC------CGACCCGGGCCGCACCTTGT--------------AGGAAACTAGCAAGT
GTTTGGGCTCCGGGGGGAGTATGGTCGCAAGACTGAAACT--------------------
------------------------------------------------------------
------------------------------------------------------------
------------------------------------------------------------
------------------------------------------------------------
------------------------------------------------------------
------------------------------------------------------------
------------------------------------------------------------
------------------------------------------------------------
------------------------------------------------------------
------------------------------------------------------------
------------------------------------------------------------
------------------------------------------------------------
------------------------------------------------------------
---------------------------------------------------------TAA
AGGAATTGACGGAAGAG-CACACAAGGAGT------------------------------
------------------------------------------------------------
------------------------------------------------------------
------------------------------------------------------------
------------------------------------------------------------
----------------------------GGAGCCTGCGGCT-------------------
------------------------------------------------------------
------------------------------------------------------------
------------------------------------------------------------
------------------------------------------------------------
------------------------------------------------------------
------------------------------------------------------------
------------------------------------------------------------
------------------------------------------------------------
------------------------------------------------------------
------------------------------------------------------------
------------------------------------------------------------
------------------------------------------------------------
------------------------------------------------------------
------------------------------------------------------------
------------------------------------------------------------
------------------------------------------------------------
------------------------------------------------------------
------------------------------------------------------------
------------------------------------------------------------
------------------------------------------------------------
------------------------------------------------------------
------------------------------------------------------------
------------------------------------------------------------
------------------------------------------------------------
------------------------------------------------------------
--------------------------------------TAATTTGACTCAACACGGGAAA
ACTCACATTGGCAAGAGAGGGGTAGGATGCACAGCATAACTTGCTACGCAAGA--TTCTC
TCAGTGGTGGTGCATGGTCGT---------------------------------------
------------------------------------------------------------
------------------------------------------------------------
------------------------------------------------------------
------------------------------------------------------------
------------------------------------------------------------
------------------------------------------------------------
------------------------------------------------------------
------------------------------------------------------------
---------TCTTAGTTCGTGGA-GCGATTTGTCTGGTCTATTCCGCTAACGAGCAAGAT
CCCGACTTCTGGGTGTTGCCG--CCCCT--GTGCG----GCTTGGT--GCGTGCGCCGGG
TTCCGGGCCGGGTCCTCACGGACTTGGTCGCAGGCTGCCTAGTGCTGCATCGGTTATTAG
TAGGAACGGGCCGAGTGCGTAAGCACGGAGCTCCGGTCCCGGTTTTTTCAGGGTGATACA
CGACTCTTGGGTCTT---------------------------------------------
------------------------------------------------------------
-------------------------------TGGGCCTGCA-AGGCGTGCCCGC---TTT
CAAGCGGGAG-TAAC--GGGTCAATAACAGGTTGCCATACAGAGACGGATGTCTCAGAAG
ACCCGATCCTAACGATTACACCTAACGATCATATCAGTGGCCTGTAAAAGCGGCACTAAA
AATGCGCGCTAGTCGGTTCTGCACTGCTCCGGAACAGGCAGTTCAAGCAACACCATCAAA
TTGCAGGGACGTCCTGAAATTAATAGTTCTGCTACTAACCAATTGTCCTAAAGGCAGAAA
GATCAAGGGCTATGATCTCTACGAAACTAGACAACTGGCTGCTGAGAGTACAAACATTAC
GATGGTCTTGTACAAGTAAAAAACGCAAAACTTTAGGGGATAATCCGCCAGCCAAGCCCC
GTTGTTAAAAGACGCACGCACCTCCCCTTGAATTGAAGGGCCCTGCCTGTGAACCTTAAC
GCGCAATCGGGGATCGGGAAGTCCCTAACCCGTGTCCAGCGGCCTGAGTTGACCACGGGT
GCAGTTCACAGACTAAATGTTGGTGGGTTCCCGTACCGGTGGATACAGAGACGACCCGGG
ATAACAACGGTG-CCTGTTAGGCACCGTGACCTTCCCCGGGCCTCCGTCTTAGTGCACCG
CACGGGGGCTTCAGATATAGTCGGGCCCCATAGAGATATGGCTTGTAGGAGGAACGTCGG
GGTAACTCCCGGCCGGAGAGCCTATGAGGTCCCCAGAGCTAGCCGCCGCGGAGGGCGCAG
GTTCCTGGGGTCGGTGGTCACCGCAGT-GATGCCCT------------------------
------------------------------------------------------------
------------------------------------------------------------
------------------------------------------------------------
------------------------------------------------------------
------------------------------------------------------------
------------------------------------------------------------
-------------TAGATGC--TTTTGGCTGCACGCGCGCTACAATGGAGCGAG--CACC
GGGTGACGGCTCCTAACGGAAGCTCGCGGG------------------------------
-------TT--------ACACCGCGTTTGTCAACCCTCGAAATACGCCCCTT-AACTGGG
ATCGCACCGAGTATCTCGGTAC------GCATGAACGTGGAATTTCTAGTACCCGCC-GT
TCAACAGACGGTGTGGATTCTGTCCCTGCTCT----------------------------
------------------------------------------------------------
------------------------------------------------------------
------------------------------------------------------------
------------------------------------------------------------
------------------------------------------------------------
------------------------------------------------------------
------------------------------------------------------------
------------------------------------------------------------
-------------------------TTGTACACACCGCCCGTCGCTCCTACCGATTGAGC
TCCTGGGTGAGCTAGGGTGACCCGAATGCTGT----------------------------
------------------------------------------------------------
------------------------------------------------------------
------------------------------------------------------------
------------------------------------------------------------
------------------------------------------------------------
------------------------------------------------------------
------------------------------------------------------------
------------------------------------------------------------
------------------------------------------------------------
------------------------------------------------------------
------------------------------------------------------------
------------------------------------------------------------
------------------------------------------------------------
------------------------------------------------------------
------------------------------------------------------------
------------------------------------------------------------
------------------------------------------------------------
------------------------------------------------------------
------------------------------------------------------------
------------------------------------------------------------
------------------------------------------------------------
------------------------------------------------------------
------------------------------------------------------------
------------------------------------------------------------
------------------------------------------------------------
------------------------------------------------------------
------------------------------------------------------------
------------------------------------------------------------
------------------------------------------------------------
------------------------------------------------------------
------------------------------------------------------------
-------------------------TCGGTCTTTTAAGCCAC--ATAACGCGGTGGCCGG
GCTATTCACTCAACACGGGGCAACCTGGAAACCGATAATCTTC--GCGAACCGTT-GGCT
TAGAGGAAGGAGAAGCCG
>Calomyxa_metallica_JX481284
-------------------------------n----------------------------
------------------------------------------------------------
-----------------------------------CGAACGGCTCCGTATATCGGTTGCA
A-CCCGGGGGGGTAGTGAGGTGCTGTGTAAGTGAGCGATGCC------------------
------------------------------------------------------------
------------------------------------------------------------
------------------------------------------------------TCG-AA
GG-ATATC-CGAGGCAATTCTTTGGCATAATACTTAT-TTAAAATCCCGCTGCGTTTGAG
GGGAAGCCTGCGCCAGCAGGCTTGGGGCCGCGGGGCCCTTAAAAGCTCCGCGGTAACTTT
GTAGCTCGCGGTCCGCCCTCACGGGCTCCGCTTGCACCTCCTCCGGTTGGACTCAAGTTG
GGGGCCGCCCCCCCACACGAATGAGGACGGGAGAATCGTGGCTCCCGGACTCCTTAAGCT
CACAGACCCACGATGAATCAGGGGGTGCCTAC----------------------------
------------------------------------------------------------
------------------------------------------------------------
CAT---AC-TGGC-TAACCA----------------------------------------
------------------------------------------------------------
-------------------------GATGGC--CAGA---GCGCCCCCCGGGCTTCTGCC
CTATCA-ACT-ATACAGCGCGGGACCGCCCCCC-GGTGGTGACAACGGGTACAGAGGATC
AGGGTTCGATCCTGGAGAGGAAGCCTTAAAGATCGCTTCCACTTCTAAGGAAGGCAGCAG
GCGCGCAACGTTCCCAATGGGG---------GCAC---------CCTGAGGACGTGAAGG
GACGTAACAATGCCCGCCCC--ATAA-----AGGCGGGCAATTGA-GATGGGGTCGTTTT
AAATC-CCCTACCG-------AGTAACAATTGGAGGACAAGTCTGGT-------------
------------------------------------------------------------
------------------------------------------------------------
------------------------------------------------------------
------------------------------------------------------------
------------------------------------------------------------
------------------------------------------------------------
------------------------------------------------------------
------------------------------------------------------------
------------------------------------------------------------
------------------------------------------------------------
------------------------------------------------------------
------------------------------------------------------------
------------------------------------------------------------
------------------------------------------------------------
------------------------------------------------------------
------------------------------------------------------------
------------------------------------------------------------
------------------------------------------------------------
--------------------------------------------------------GCCA
GCACCCGCG---------------------------------------------------
------------------------------------------------------------
------------------------------------------------------------
------------------------------------------------------------
------------------------------------------------------------
------------------------------------------------------------
------------------------------------------------------------
------------------------------------------------------------
------------------------------------------------------------
------------------------------------------------------------
------------------------------------------------------------
------------------------------------------------------------
------------------------------------------------------------
------------------------------------------------------------
------------------------------------------------------------
------------------------------------------------------------
------------------------------------------------------------
------------------------------------------------------------
------------------------------------------------------------
------------------------------------------------------------
--------------------------------------GTAATTCCAGCTCCGATAGCAT
CTTGTTGAGTTGTTGCAGTTAAAACGCTCGTAGTCCGA-GTGTG--CACCCCCCTCC---
------------------------CGGCAACCGGCCGGTGCTCGTGTTTCTTGGATTTGC
GCCCTCTCTGCTCTCCTTCGGGATTGCGGCTTGGGAATTGCGTCCAGGGGATCGACCCGC
GTTGGTCCGTGGGGCGGGGGTGCATACTGATCCGGAACCGGATAGGGGGGCCATGTACTT
GGTCCCCCCCTGTACG--------------------------------------------
------------------------------------------------------------
------------------------------------------------------------
------------------------------------------------------------
------------------------------------------------------------
------------------------------------------------------------
-----------------------------------------------CCCGGGTCGTATT
ACTTTGAG--TAAATTAGAGCGCTCAAAGCAGGTCATCTGCGGAGGACCTTAAGGAAAAC
CA------------------------------CCGAA-TATCAC-AGCAAAGAATAATGG
AGTAGGCCTAGCCATGTC------CATTGGTCGTGGT-----------------------
------------------------------------------------------------
-----------------------------------------AGAGGAA-TGGTCAATTGG
GGGGATCGGGGTGGACCACATGCACGGGGTAGGGGTGAAATCCGTTGATCCTGTGTAGGT
GCCCAAGAGCGAAAGCAGTC-CACTAGTACCCTTTCTTTGATCAAGAACGAAAGTCTGGG
GAGCGAAGATGAT-----------------------------------------------
------------------------------------------------------------
------------------------------------------------------------
------------------------------------------------------------
------------------------------------------------------------
------------------------------------------------------------
------------------------------------------------------------
------------------------------------------------------------
------------------------------------------------------------
------------------------------------------------------------
------------------------------------------------------------
------------------------------------------------------------
------------------------------------------------------------
------------------------------------------------------------
------------------------------------------------------------
------------------------------------------------------------
------------------------------------------------------------
---CAGATACCATCGTAGTCCAGACCCTAAATGATGCCGACTTTGGATCGGGGAC-CGCC
CCTCT-------GGCAGCCTAGGCACCATGT--------------GAGAAATCAGT-AGT
GTCTGGGCTCTGGGGGGAGTATGGTCGCAAGACTGAAACTTTAGCGTAATCTTGGGTTTT
AAAAACAGGCTCAAAGTGCCCTGTTAGTCCTGGGGTGTGTGTGCAGGCGAGGGCCCCGAA
AGGCCCTTTGACCCCGTGCCCCCCCCCCAACCGTGAATTGACACGGTTTAAAGGGCGACA
CGATCAAATTGCTGGAACACCCTAAAGCTACCGCTACTAAACACGCGTCAAAAGGCGGAA
AAAACAGGTGCGCGGATCTCTAGTGATTAATGTGTGTAGCCTACGTGAAGAGTAGTGACT
GTACTCGGAAGTGCTGCAAGGAGGGGCATGTGAGCCCGGGTGGGGGGCCAAAGCGGCCTA
TTCAACCTGCCTTCAGCCTAGTAAGTGTACAATTGCGAGAAAATGTAGGCGATAATATTT
TTTGCTGGAGGGAGTACTTGCGTGTGGCCAGGGTAATGACCTCGGGTATAGTGAAAACGC
GGTAGATGAGGCCGGGGGATTTGGTCTCCCCCGGTCAATGAAATGGGCAACCAGCAGCCA
AGTCCGTCAGCAGCCCTTGTTGCTTCAATGTGAAGAGGCACACCAAAAGGGCAGCCCGGA
TGCAGTTCACAGGCCAAATGTTCGTGGGTCATGCTTGCTGTTCTAGCATAAGTGTGGCAT
AAGATATGGTCGGCCCCCTTGGGAAACCTTGGGGATTAAGCG------------------
------------------------------------------------------------
------------------------------------------------------------
---------------------------------------------------------TAA
AGGAATTGACGGAAGAG-CACACAAGGAGT------------------------------
------------------------------------------------------------
------------------------------------------------------------
------------------------------------------------------------
------------------------------------------------------------
----------------------------GGAGCCTGCGGCT-------------------
------------------------------------------------------------
------------------------------------------------------------
------------------------------------------------------------
------------------------------------------------------------
------------------------------------------------------------
------------------------------------------------------------
------------------------------------------------------------
------------------------------------------------------------
------------------------------------------------------------
------------------------------------------------------------
------------------------------------------------------------
------------------------------------------------------------
------------------------------------------------------------
------------------------------------------------------------
------------------------------------------------------------
------------------------------------------------------------
------------------------------------------------------------
------------------------------------------------------------
------------------------------------------------------------
------------------------------------------------------------
------------------------------------------------------------
------------------------------------------------------------
------------------------------------------------------------
------------------------------------------------------------
------------------------------------------------------------
--------------------------------------TAATTTGACTCAACACGGGGAA
ACTCACAGAAGCCGGAAATGGTTGTGATTGTCCGCCCTACAGGGGCTGCTTGA--TTTTA
TTAGTGGTGGTGCATGGTCGT---------------------------------------
------------------------------------------------------------
------------------------------------------------------------
------------------------------------------------------------
------------------------------------------------------------
------------------------------------------------------------
------------------------------------------------------------
------------------------------------------------------------
------------------------------------------------------------
---------TCTTAGTTCGTGGA-GTGATTTGTCTGGTTTATTCCGCTAACGAGCGAGAA
CCCCTTCTTCCATAGTTGCGT--GCAGG-GTGGCC----GCCTGG---GGAGTGCCGTTT
CATTTGCTGCGGTGGGGCGTGTAAGGAGCCGTTGTGGGTGGTGAGGTCAAGGGCCGCTGG
AGGTGGTGGGGTTCGCGCCCTGCCGCTAAAGGTGGATTCCTGGCTTTGCTAGCTGCAGCG
GCCACCTGCTCGCTATTCCAAACTGCCACAGTCGGGTGATTCTGGCGCGAGCCTGGCTGA
AAACGTGCCATCAGGCC-------------------------------------------
--------------------------------GGACCTTGG-GGAACAGCCCAG---AAC
AACTGGGCTG-TAGCG-GGGTCAATAACAGGT----------------------------
------------------------------------------------------------
------------------------------------------------------------
------------------------------------------------------------
------------------------------------------------------------
------------------------------------------------------------
------------------------------------------------------------
------------------------------------------------------------
------------------------------------------------------------
------------------------------------------------------------
------------------------------------------------------------
------------------------------------------------------------
-----------------------CAGT-GATGCCCT------------------------
------------------------------------------------------------
------------------------------------------------------------
------------------------------------------------------------
------------------------------------------------------------
------------------------------------------------------------
------------------------------------------------------------
-------------TAGATGC--TTCTGGCTGCACGCGCGCTACACTGGGGGGGT--GAGC
GGGCTCT-----------------------------------------------------
-CCCGCACC-------GAGAGGTGG-TGGGGAACCCTGTGAAACCCCCCCGT-GTCTGGG
ATCGTTGGGTGCAAAAACCCT-------TCGTGAACAAGGAATTTCTAGTAATCGCA-GG
TCACAAGCCTGCGGTGATTTCGTCCCTGCTCTTTGTAACTGGGAGCTAAGAGGGGGCTGA
AAAGTACCCCTAGTCCGGGCCGGGTGTAAACCTGGCCATCGTCCCTGAATTGACAGGACG
ATCCCTGAGAAAGGATGGGCAACACCCTCAAATTGTCGGGAAGTCCCTTAGAGCCCTCTC
TACCAACCATGCGCCGAAAGGCGGAAAAATAGCCAGCGCTTGCACCCCTAACACGGGGAG
CTGGGCTCATGGGGCCAGGTTAATAGCCTCGGGTACGGTAAAAAAGAGGGGGATTGGGTA
ACCCGCAGCCAAGCCCGTGACAAAGCGGCATGGAGCATGGCACCGTGAAAATGGTCCACG
TTCCGCCAGTGGCCAGAGCTTCACAGCCCTGAGTCACCACGGGTGCAGTTCACAGACTAA
ATGGTGGTGGGTATTTTGCCATACAGCCTGCTGTATTGGTGGGTTGCTTAAGATATAGCC
GGCCCTCCTCCGAAAGGTGGCATGCTCGTATATATAAAGGAGCGTGGGCTCTCCCCTCTT
TATGAGGGAGAGTTTGGAATAAGTGTTGTACACACCGCCCGTCGCTCCTACCGATTGGGT
TGCCTGGTGAACCACATGGAGGCGGCTGTTGGAG--------------------------
------------------------------------------------------------
------------------------------------------------------------
------------------------------------------------------------
------------------------------------------------------------
------------------------------------------------------------
------------------------------------------------------------
------------------------------------------------------------
------------------------------------------------------------
------------------------------------------------------------
------------------------------------------------------------
------------------------------------------------------------
------------------------------------------------------------
------------------------------------------------------------
------------------------------------------------------------
------------------------------------------------------------
------------------------------------------------------------
------------------------------------------------------------
------------------------------------------------------------
------------------------------------------------------------
------------------------------------------------------------
------------------------------------------------------------
------------------------------------------------------------
------------------------------------------------------------
------------------------------------------------------------
------------------------------------------------------------
------------------------------------------------------------
------------------------------------------------------------
------------------------------------------------------------
------------------------------------------------------------
------------------------------------------------------------
------------------------------------------------------------
-----------------------------------------GCCTTCCCCAGGGAAGGCC
TGTCCCGAAAGGGCGGCAACGGCCATTTTCATGCCGAAGTGTG--GTGAACCTCGCGACC
TAGAGGAAGGAGAAGTCGTA
>Ceratiomyxa_fruticulosa_CH1_EF513173
-------------------------------n--GTT-CTCTCGAAGATT-AAGCCATGC
AAGCGTTA--GCATA------AAG----CGG---CTT-----------------------
---------------------CGGCCCTCAGGCTGTGGATGGCTCATTATATCAGTTATG
A-CCTACAC-TCAGATAAACGCCTTCGGGTTACCGAAGGAG-------------------
------------------------------------------------------------
------------------------------------------------------------
------------------------------------------------------TAC-AT
GG-ACAAC-TGCTGTAACACGG-GAGCTAATACATAG-AGAGC-----------------
------------------------------------------------------------
----------------------GGTTCAACGTTTTGCATAAAAACGAC--------A-CC
GCGT-TCCCTATTAACAAGCCCCGATAAAATCAAGCAT-GAACTTGGTCA--CGTGGTTC
GCCA-CGTGAC--CAGACAT----------------------------------------
------------------------------------------------------------
--------------------------------------GATTG-TGGCG-AACGCAGTT-
GATC--ACATGTGCCTCTTCGGGA------------------------------------
------------------------------------------------------------
-----------------------------GCACGGTGCGTCTTGAGTTCGGGTTTCTGCC
CTATCA-GCT-CGTTGCATAGGTATTGCCTATG-CACGGCGGTTACGGGTACGGGGAATC
AGGGTTCGATTCCGGAGAGGGAGCCTGAGAAATAGCTACCACCCCTAAGGGGGGCAGCAG
GCGCGAAAATTACCCAATGCTA---------ACAC---------AGCGAGGTAGTCACGA
GAAATACCGATACCGCCGTTTGTCAAA----ACGACGGTAATTGG-CATGTGAACAGTTT
AAACC-ACTTAACT-------AGGATCAATTAGAGGACAAGTCTGGT-------------
------------------------------------------------------------
------------------------------------------------------------
------------------------------------------------------------
------------------------------------------------------------
------------------------------------------------------------
------------------------------------------------------------
------------------------------------------------------------
------------------------------------------------------------
------------------------------------------------------------
------------------------------------------------------------
------------------------------------------------------------
------------------------------------------------------------
------------------------------------------------------------
------------------------------------------------------------
------------------------------------------------------------
------------------------------------------------------------
------------------------------------------------------------
------------------------------------------------------------
--------------------------------------------------------GCCA
GCACCCGCG---------------------------------------------------
------------------------------------------------------------
------------------------------------------------------------
------------------------------------------------------------
------------------------------------------------------------
------------------------------------------------------------
------------------------------------------------------------
------------------------------------------------------------
------------------------------------------------------------
------------------------------------------------------------
------------------------------------------------------------
------------------------------------------------------------
------------------------------------------------------------
------------------------------------------------------------
------------------------------------------------------------
------------------------------------------------------------
------------------------------------------------------------
------------------------------------------------------------
------------------------------------------------------------
------------------------------------------------------------
--------------------------------------GTAATTCCAGCTCTAATAACAT
CGCCTAAATTTGCTGCAGTT-AAACGCTCGTAGTCGGC-TCCCA--GTCGACCGTGCTTA
AAAATGGCACGCTGTTTGCTC---CGAGGTCTACCCACGCGAGACGGACCTGGATCCGTC
TTGTGCCAAGT-GCTTCGTTGAGCAACAGCGCCCCGGCATGGAAGACATTTTACTAATGT
ACGCATACGCACCCGGTGTCCCATCATTTTGACGGGCCCGGGTTTT--------------
------------------------------------------------------------
------------------------------------------------------------
------------------------------------------------------------
------------------------------------------------------------
------------------------------------------------------------
------------------------------------------------------------
----------------------------------------------GAGCGTCCTATTTT
ACCGTAAG--AAAAATAGAGCGCTCAAGGCAGGCTAGAATACCGGGCTCCCCCGGTAGCT
AACCACGCTCCACCGTCACTGGTGG-GGCGGAGTGCA-TACATT-AGTACGGGACAACTC
AATTGGCCTCACC--TCCAGGG--GCTTGTTGGGCTAGACC-------------------
--------CCGTGCGGGGAGGCCTCACTCCGGTAACACGGATTGAGGTTCCGCACGG---
-----------------------------------------GCGGCAA-TGCGCAATAGG
GGCGGTTGGGGGCATACGTATTATCGGGCTAGAGGTGAAATTCTTGGACCCCGATAAGAC
GACCGGATGCGAAAGCGTTT-GTCAAAAACGTTTTCATTGATAAAGAACGAAAGTTTAGG
GAGCGAAGATGAT-----------------------------------------------
------------------------------------------------------------
------------------------------------------------------------
------------------------------------------------------------
------------------------------------------------------------
------------------------------------------------------------
------------------------------------------------------------
------------------------------------------------------------
------------------------------------------------------------
------------------------------------------------------------
------------------------------------------------------------
------------------------------------------------------------
------------------------------------------------------------
------------------------------------------------------------
------------------------------------------------------------
------------------------------------------------------------
------------------------------------------------------------
---CAGATACCGTCGTAGTCTAGACTGTAAAAACTACCGACGGGTTATTGGCGCG-CGTC
CAATATGGTA-CGACCCCGCCAGCAACCTTCACAATTTTAA---ATGGAAACTT--GAGT
G-ATGGGTTCTGGGGGGAGTATGGTCGCAAGACTGAAACT--------------------
------------------------------------------------------------
------------------------------------------------------------
------------------------------------------------------------
------------------------------------------------------------
------------------------------------------------------------
------------------------------------------------------------
------------------------------------------------------------
------------------------------------------------------------
------------------------------------------------------------
------------------------------------------------------------
------------------------------------------------------------
------------------------------------------------------------
------------------------------------------------------------
---------------------------------------------------------TAA
AGGAATTGACGGAAAAA-TACACCAGGAGT------------------------------
------------------------------------------------------------
------------------------------------------------------------
------------------------------------------------------------
------------------------------------------------------------
----------------------------GGAGCTTGCGGTT-------------------
------------------------------------------------------------
------------------------------------------------------------
------------------------------------------------------------
------------------------------------------------------------
------------------------------------------------------------
------------------------------------------------------------
------------------------------------------------------------
------------------------------------------------------------
------------------------------------------------------------
------------------------------------------------------------
------------------------------------------------------------
------------------------------------------------------------
------------------------------------------------------------
------------------------------------------------------------
------------------------------------------------------------
------------------------------------------------------------
------------------------------------------------------------
------------------------------------------------------------
------------------------------------------------------------
------------------------------------------------------------
------------------------------------------------------------
------------------------------------------------------------
------------------------------------------------------------
------------------------------------------------------------
------------------------------------------------------------
--------------------------------------TAATTTGACTCAACACGGGAAA
ACTTACGAGGTCAGGATAAACAATGGATTGACAGACTAAAAGATCTTTCTTGA--TCGTT
TAAATGGTGGTGCATGGCCGT---------------------------------------
------------------------------------------------------------
------------------------------------------------------------
------------------------------------------------------------
------------------------------------------------------------
------------------------------------------------------------
------------------------------------------------------------
------------------------------------------------------------
------------------------------------------------------------
---------TCTTAGTTGGTGGA-GTGATTTGTCTACTTAATTGTGCTAACGAACGAGA-
CCTTGCCCTGCTAAGTAG-CAC--GG--GTTAAAC----T--ATA-T-TAAGCATAACCG
ACCTACCCCGGCGTGTCCCGGGCCAG-CTCGGTTCGCCTCGGCCC--G------------
----CCAGCCCCCTCCTTCGGGAGGACTGACGGGTACAGCGGACCGAGAACTGGCCCCTC
GAAAGGGTCACGTCCCCCGGGTCGTTAAACAAGGG---GGGATACCGGGGGCGGCACGGG
GGAGGGGTCGTAACCCGGCCCTGGAATTACCCGTGCTCGCTACTAATATAACACGATAAT
GGTTTTAATGGGTTTAAAGCCCC--------GTTTCTTAGAGGGACTACC-GGC---CGC
CAACCGGTGG-AAGATCAAGGCAATAACAGGT----------------------------
------------------------------------------------------------
------------------------------------------------------------
------------------------------------------------------------
------------------------------------------------------------
------------------------------------------------------------
------------------------------------------------------------
------------------------------------------------------------
------------------------------------------------------------
------------------------------------------------------------
------------------------------------------------------------
------------------------------------------------------------
-----------------------CTGT-GATGCCCT------------------------
------------------------------------------------------------
------------------------------------------------------------
------------------------------------------------------------
------------------------------------------------------------
------------------------------------------------------------
------------------------------------------------------------
-------------TCGATGT--TCTCGGCCACACGCGCGCTACACTGAACGCTG--TAAA
GAGTCCAAATCGCGACAGGG-ACCCGCTAATTTATTAG----CGACCCTGAAGCGGTGGA
GCCAAGGCC--------GAAAGGCC-GAGGTAATCTG--CAGCGGCGTTCGT-GCTAGGG
ATAATCGATTGAAATTATCCG-------ATTTAAACGAGGAATTCCTAGTAAGCGCG-GT
TCATCACACCGCGCTGACTACGTCCCTATTTT----------------------------
------------------------------------------------------------
------------------------------------------------------------
------------------------------------------------------------
------------------------------------------------------------
------------------------------------------------------------
------------------------------------------------------------
------------------------------------------------------------
------------------------------------------------------------
-------------------------TTGTACACACCGCCCGTCGCTCCTACCGATCGAAC
ACGAGGGTGAAGCCAGTCGGGTCGTCTAGCCCT---------------------------
------------------------------------------------------------
------------------------------------------------------------
------------------------------------------------------------
------------------------------------------------------------
------------------------------------------------------------
------------------------------------------------------------
------------------------------------------------------------
------------------------------------------------------------
------------------------------------------------------------
------------------------------------------------------------
------------------------------------------------------------
------------------------------------------------------------
------------------------------------------------------------
------------------------------------------------------------
------------------------------------------------------------
------------------------------------------------------------
------------------------------------------------------------
------------------------------------------------------------
------------------------------------------------------------
------------------------------------------------------------
------------------------------------------------------------
------------------------------------------------------------
------------------------------------------------------------
------------------------------------------------------------
------------------------------------------------------------
------------------------------------------------------------
------------------------------------------------------------
------------------------------------------------------------
------------------------------------------------------------
------------------------------------------------------------
------------------------------------------------------------
--------------------------------------------------GCGGGCTCTC
GTCGAAAGA-CGAGGCGGCAGGGTGAACAGGCGGCTTTGGCTG-GCTCAGCCCCCGTGT-
-AGAGGAA
>Ceratiomyxa_fruticulosa_CH2_EF513174
-------------------------------n----------------------------
------------------------------------------------------------
----------------------GTCCATGAGGCTGCGGATGGCTCATTAGTACAGTTATT
AACCTACGCGTCAGATACACGCCTTTCAT----CGAGGTGT-------------------
------------------------------------------------------------
------------------------------------------------------------
------------------------------------------------------GCC-AT
GG-ACAAC-TGCCGTAACTCGG-GAGCTAATACATAT-CGTTCC----------------
------------------------------------------------------------
---------------------GGCTCATACGTTTTGCATAAAAACGA---------G-CC
GCGT-TCGTTTAGTACAAGCCCC---TGTA-AAAGCAT-GAACCTGGCCG---GCCTTCG
GGCCGGCCAGT------AGT----------------------------------------
------------------------------------------------------------
--------------------------------------GATTG-TGGCG-AACGCAGTT-
GATC--GCATGTG-CCCTTCGTTG------------------------------------
------------------------------------------------------------
-----------------------------GCTCGGCGCGTCTTGAGCTCGGGTTTCTGCC
CTATCA-GCT-CGACGCATAGGTATTGCCTATG-CAGGGCCGTAACGGGTACGGGGAATC
AGGGTTCGATTCCGGAGAGGGAGCCTGAGAAATAGCTACCACCCCTAAGGGGGGCAGCAG
GCGCGAAAATTACCCAATGCTA---------ACAC---------AGCGAGGTAGTCACGA
GAAATACCGATACTGCCGTC-GTCAAG----ACGGCGGTAATTGG-CATGTGAACAGTCT
AAACC-GCTTAACT-------AGGATCAATTAGAGGACAAGTCTGGT-------------
------------------------------------------------------------
------------------------------------------------------------
------------------------------------------------------------
------------------------------------------------------------
------------------------------------------------------------
------------------------------------------------------------
------------------------------------------------------------
------------------------------------------------------------
------------------------------------------------------------
------------------------------------------------------------
------------------------------------------------------------
------------------------------------------------------------
------------------------------------------------------------
------------------------------------------------------------
------------------------------------------------------------
------------------------------------------------------------
------------------------------------------------------------
------------------------------------------------------------
--------------------------------------------------------GCCA
GCACCCGCG---------------------------------------------------
------------------------------------------------------------
------------------------------------------------------------
------------------------------------------------------------
------------------------------------------------------------
------------------------------------------------------------
------------------------------------------------------------
------------------------------------------------------------
------------------------------------------------------------
------------------------------------------------------------
------------------------------------------------------------
------------------------------------------------------------
------------------------------------------------------------
------------------------------------------------------------
------------------------------------------------------------
------------------------------------------------------------
------------------------------------------------------------
------------------------------------------------------------
------------------------------------------------------------
------------------------------------------------------------
--------------------------------------GTAATTCCAGCTCTAATAACGT
CGCCCTAATTTGCTGCAGTTAAAACGCTCGTAGTCGGC-GCCCA--GTCTGCCGTGTTTA
ATAATGGTACCCAGCTAGAGC---CCCCTTCGACCCCCGCAGCCCGGACTCGTTCCGGAC
CGCGACGGGAA-GATCGCCGGGCCGCTGGCGTGCCGACATGGCAGGCGTGTTACTTTTGT
ATGAACTTGCACC-GGCGTCGG-TCCTTGCGACCGGCACCGGTCT---------------
------------------------------------------------------------
------------------------------------------------------------
------------------------------------------------------------
------------------------------------------------------------
------------------------------------------------------------
------------------------------------------------------------
----------------------------------------------GAGCGTACTGTTTT
ACCGTAAG--GAAAATAGAGCGCTCGAGGCAGGCTAGAATACCGGTACTCCCGGTAGCTA
ACCACGTGCCGCCCTTAAAA-GCGG-CACGGAGTGCA-TACACT-AGTACGGGACAACTC
AATAGGCCTCACC-TCCCGGGG--GCTTGTTGGGCTATGAC-------------------
--------TCGTGCGGCCAAGGTCCACCCCGGTCATCCGGGATGGG-CCTCGCACGG---
-----------------------------------------GGGGCAA-TACGCAATAGG
GGCGGTTGGGGGCATACGTATTATCGGGCTAGAGGTGAAATTCTTGGACCCCGATAAGAC
GACCGGATGCGAAAGCGTTT-GTCAAAAACGTTTTCATTGATAAAGAACGAAAGTTTAGG
GAGCGAAGATGAT-----------------------------------------------
------------------------------------------------------------
------------------------------------------------------------
------------------------------------------------------------
------------------------------------------------------------
------------------------------------------------------------
------------------------------------------------------------
------------------------------------------------------------
------------------------------------------------------------
------------------------------------------------------------
------------------------------------------------------------
------------------------------------------------------------
------------------------------------------------------------
------------------------------------------------------------
------------------------------------------------------------
------------------------------------------------------------
------------------------------------------------------------
---CAGATACCGTCGTAGTCTAGACTGTAAAAGCTACCGACGGGTTATTGGCACG-CGTC
CAATATA----CGACCCCGCCAGCAACTTTCACTATGTCTAA-AATGGAAACTA--GAGT
G-ATGGGTTCTGGGGGGAGTATGGTCGCAAGACTGAAACT--------------------
------------------------------------------------------------
------------------------------------------------------------
------------------------------------------------------------
------------------------------------------------------------
------------------------------------------------------------
------------------------------------------------------------
------------------------------------------------------------
------------------------------------------------------------
------------------------------------------------------------
------------------------------------------------------------
------------------------------------------------------------
------------------------------------------------------------
------------------------------------------------------------
---------------------------------------------------------TAA
AGGAATTGACGGAAAAA-TACACCAGGAGT------------------------------
------------------------------------------------------------
------------------------------------------------------------
------------------------------------------------------------
------------------------------------------------------------
----------------------------GGAGCTTGCGGTT-------------------
------------------------------------------------------------
------------------------------------------------------------
------------------------------------------------------------
------------------------------------------------------------
------------------------------------------------------------
------------------------------------------------------------
------------------------------------------------------------
------------------------------------------------------------
------------------------------------------------------------
------------------------------------------------------------
------------------------------------------------------------
------------------------------------------------------------
------------------------------------------------------------
------------------------------------------------------------
------------------------------------------------------------
------------------------------------------------------------
------------------------------------------------------------
------------------------------------------------------------
------------------------------------------------------------
------------------------------------------------------------
------------------------------------------------------------
------------------------------------------------------------
------------------------------------------------------------
------------------------------------------------------------
------------------------------------------------------------
--------------------------------------TAATTTGACCCAACACGGGAAA
ACTTACGAGGTCAGGATAAACAATGGATTGACAGACCAAATGATCTTTCTTGA--TCGTT
TAAGTGGTGGTGCATGGCCGT---------------------------------------
------------------------------------------------------------
------------------------------------------------------------
------------------------------------------------------------
------------------------------------------------------------
------------------------------------------------------------
------------------------------------------------------------
------------------------------------------------------------
------------------------------------------------------------
---------TCTTAGTTGGTGGA-GTGATTTGTCTACTTAATTGTGCTAACGAACGAGA-
CCTTGCCCTGCTAACTAG-CAA-CGGG-GTTAAAC----T--ATA-T-TAAGCATAAAGG
ACC-GCACCGGCGCTGCCGGGCCGAG-ACAGGCCGCCAAGGCCCC--C------------
----CGCTCTCACGGGCGGGGGGTACATCGGTCTGGCTACGGCCCTATAATCTATACAGG
CGGCGTCCCCCGGGTCTTGAAACAAAGGGGGTACC---GGTGGAACCCCGTCGGTCGGGC
CGTAACACGGTCCGGCTGGCGGGGCTCTGCTCC-----------GATATAACGCGATAAT
GGTTTTAATGGGTTTAAAGCCTT--------GCTTCTTAGAGGGACTACC-GGC---CGC
CAACCGGTGG-AAGATCAAGGCAATAACAGGT----------------------------
------------------------------------------------------------
------------------------------------------------------------
------------------------------------------------------------
------------------------------------------------------------
------------------------------------------------------------
------------------------------------------------------------
------------------------------------------------------------
------------------------------------------------------------
------------------------------------------------------------
------------------------------------------------------------
------------------------------------------------------------
-----------------------CTGT-GATGCCCT------------------------
------------------------------------------------------------
------------------------------------------------------------
------------------------------------------------------------
------------------------------------------------------------
------------------------------------------------------------
------------------------------------------------------------
-------------TCGATGT--TCTCGGCCACACGCACGCTACACTGAACATTC--TAGA
GAGTCCAAGCTGCGACGGGG-ACCCGCTAATATCAAAATTACCGGCCCCGGAGCGGTGGA
GGCAAGGCC--------GAGAGGCT-GAGGTAATCTG--GAACGGTGTTCGT-GCTAGGG
ATAATCGATTGCAATTATCCG-------ATTTGAACGAGGAATTCCTAGTAAGTACG-GT
TCATCACACCGTGCTGACTACGTCCCTATTTT----------------------------
------------------------------------------------------------
------------------------------------------------------------
------------------------------------------------------------
------------------------------------------------------------
------------------------------------------------------------
------------------------------------------------------------
------------------------------------------------------------
------------------------------------------------------------
-------------------------TTGTACACACCGCCCGTCGCTCCTACCGATCGAAC
ACTGGGGTGAAGCCGGTCGGGTCGCCTCGCTCT---------------------------
------------------------------------------------------------
------------------------------------------------------------
------------------------------------------------------------
------------------------------------------------------------
------------------------------------------------------------
------------------------------------------------------------
------------------------------------------------------------
------------------------------------------------------------
------------------------------------------------------------
------------------------------------------------------------
------------------------------------------------------------
------------------------------------------------------------
------------------------------------------------------------
------------------------------------------------------------
------------------------------------------------------------
------------------------------------------------------------
------------------------------------------------------------
------------------------------------------------------------
------------------------------------------------------------
------------------------------------------------------------
------------------------------------------------------------
------------------------------------------------------------
------------------------------------------------------------
------------------------------------------------------------
------------------------------------------------------------
------------------------------------------------------------
------------------------------------------------------------
------------------------------------------------------------
------------------------------------------------------------
------------------------------------------------------------
------------------------------------------------------------
-------------------------------------------------GCGGGCCCTGC
TTGAAAAGGCTAGGGCGGCAGGGCGGCTGGGCGGCTTTGGCCG-GTTCAGCCCCCGGGTT
TAGAGGAAGGAGAAGTCGTAACAAGGTATTCGTAGGTGAACCTGCAAAAGGATCA
>Ceratiomyxa_fruticulosa_F_EF513175
-----AACTTGGTTGATCCTGCCAGTGGT-TAATGTTCCTTTCGGAGATT-AAGCCATGC
ATGTGTTA--GCATA------AAG----CGG---CTT-----------------------
---------------------CGGCCCTCAGGCTGTGGATGGCTCATTATATCGGTTATG
A-TCCACGC-TCAGATAGAC-CCTTCGGGTATCCGAAGGCG-------------------
------------------------------------------------------------
------------------------------------------------------------
------------------------------------------------------TAC-AT
GG-ATAAC-TGCTGTAACTCGG-GAGCTAATACATAGTGAAAC-----------------
------------------------------------------------------------
-------------------GATCCTTACGTTCTTTGCCTAAAAACGG---------A-TC
GCGT-TCGCTT-GAACAAGCCCC---TATATCTAGCAT-GAGATCGGTCC-TACGATGCT
TGCATCGTAGTCCGAGTCAT----------------------------------------
------------------------------------------------------------
--------------------------------------GATCG-CGGCG-AACGCAGTT-
GATC--GCATGTG-CCCTTCGGG-------------------------------------
------------------------------------------------------------
-----------------------------ACACGGCGCGTCTTGAGCTCGGGTTTCTGCC
CTATCA-GCT-CGACGCATAGGTATTGCCTATG-CAGGGCTTTGACGGGTTCGGAGAATC
AGGGTTCGATTCCGGAGAGGGAGCCTGAGAAATAGCTACCACCCCTAAGGGGGGCAGCAG
GCGCGAAAATTACCCAATGCTA---------ACAC---------AGCGAGGTAGTCACGA
AAAATACCGATACCTTCGTC-AGTACG----ACGAAGGTAATTGG-AATGTGAACATTTT
AAACC-GCTTAACT-------AGGATCAATTAGAGGACAAGTCTGGT-------------
------------------------------------------------------------
------------------------------------------------------------
------------------------------------------------------------
------------------------------------------------------------
------------------------------------------------------------
------------------------------------------------------------
------------------------------------------------------------
------------------------------------------------------------
------------------------------------------------------------
------------------------------------------------------------
------------------------------------------------------------
------------------------------------------------------------
------------------------------------------------------------
------------------------------------------------------------
------------------------------------------------------------
------------------------------------------------------------
------------------------------------------------------------
------------------------------------------------------------
--------------------------------------------------------GCCA
GCACCCGCG---------------------------------------------------
------------------------------------------------------------
------------------------------------------------------------
------------------------------------------------------------
------------------------------------------------------------
------------------------------------------------------------
------------------------------------------------------------
------------------------------------------------------------
------------------------------------------------------------
------------------------------------------------------------
------------------------------------------------------------
------------------------------------------------------------
------------------------------------------------------------
------------------------------------------------------------
------------------------------------------------------------
------------------------------------------------------------
------------------------------------------------------------
------------------------------------------------------------
------------------------------------------------------------
------------------------------------------------------------
--------------------------------------GTAATTCCAGCTCTAATAACAT
CGACTAAATTTGCTGCAGTTAAAACGCTCGTAGTCGGT-TCTCG--GCCAACTGTGCTTA
AAAATGACGGACTCTTCTGCT---CCGAACGCCACGATCGACTGCGGACCTAAAAATCCC
ATTCGGTCGTC-G-TTCGTCGAGCGTAGGTTCATCGGCATGGAAGGCATTTTACTGTTGT
ACGCACTTGCGCTCCTCGACGA-GTCTCGCGACGGATCGAGGAGTT--------------
------------------------------------------------------------
------------------------------------------------------------
------------------------------------------------------------
------------------------------------------------------------
------------------------------------------------------------
------------------------------------------------------------
----------------------------------------------GAGCGT-CTTATTT
ATCGTAAG--AAAAATAGAGCGCTCAAGGCAGGCTAGAATATCGGGCTCCCCCGATAGCT
AACCACGCAACGTCCTAAAAAAGCGTTGCGGAGTGCA-TACATA-AGTACGAGACAACCT
AACTGGCCTATACCTTCTTGGG--GCTTGTTAGGCGACGCTCGGACGG------------
--------CCGCGCAAGGGTTACGCTC--------------------TTGCTCACGCGTC
CG---------------------------------------AGGGCAA-TGCGCAATAGG
GGCGGTTGGGGGCATACGTATTATCGGGCTAGAGGTGAAATTCTTGGACCCTGATAAGAC
GACCGGATGCGAAAGCGTTT-GTCAAAAACGTTTTCATTGATCAAGAACGAAAGTTTAGG
GAGCGAAGATGAT-----------------------------------------------
------------------------------------------------------------
------------------------------------------------------------
------------------------------------------------------------
------------------------------------------------------------
------------------------------------------------------------
------------------------------------------------------------
------------------------------------------------------------
------------------------------------------------------------
------------------------------------------------------------
------------------------------------------------------------
------------------------------------------------------------
------------------------------------------------------------
------------------------------------------------------------
------------------------------------------------------------
------------------------------------------------------------
------------------------------------------------------------
---CAGATACCGTCGTAGTCTAGACTGTAAAAGCTACCGACGGGTTATTGGCGTG-CGTC
CAATATGGTA-CGACCTCGCCAGAAACTTCACTTTTATTACGAAATAGAAATTC--GAGT
G-ATAGGTTCTGGGGGGAGTATGGTCGCAAGACTGAAACT--------------------
------------------------------------------------------------
------------------------------------------------------------
------------------------------------------------------------
------------------------------------------------------------
------------------------------------------------------------
------------------------------------------------------------
------------------------------------------------------------
------------------------------------------------------------
------------------------------------------------------------
------------------------------------------------------------
------------------------------------------------------------
------------------------------------------------------------
------------------------------------------------------------
---------------------------------------------------------TAA
AGGAATTGACGGAAAAA-TACACCAGGAGT------------------------------
------------------------------------------------------------
------------------------------------------------------------
------------------------------------------------------------
------------------------------------------------------------
----------------------------GGAGCTTGCGGTT-------------------
------------------------------------------------------------
------------------------------------------------------------
------------------------------------------------------------
------------------------------------------------------------
------------------------------------------------------------
------------------------------------------------------------
------------------------------------------------------------
------------------------------------------------------------
------------------------------------------------------------
------------------------------------------------------------
------------------------------------------------------------
------------------------------------------------------------
------------------------------------------------------------
------------------------------------------------------------
------------------------------------------------------------
------------------------------------------------------------
------------------------------------------------------------
------------------------------------------------------------
------------------------------------------------------------
------------------------------------------------------------
------------------------------------------------------------
------------------------------------------------------------
------------------------------------------------------------
------------------------------------------------------------
------------------------------------------------------------
--------------------------------------TAATTTGACTCAACACGGGAAA
ACTTACGAGGTCCGGATAAACAATGGATTGACAGACTGAAAGATCTTTCTTGA--TCGTT
TAAATGGTGGTGCATGGCCGT---------------------------------------
------------------------------------------------------------
------------------------------------------------------------
------------------------------------------------------------
------------------------------------------------------------
------------------------------------------------------------
------------------------------------------------------------
------------------------------------------------------------
------------------------------------------------------------
---------TCTTAGTTGGTGGA-GTGATTTGTCTACTTAATTGTGCTAACGAACGAGA-
CCTTGTCCTACTAAGTAGGCAC--GA--GATAAAC----T--ATA-T-TAACGCATAACG
ACCAGTATCGGCATCGCCGAGTCGGC-TTCGGGCGTCAAGGCTTT--G------------
----GGTTGGCTTCGGCCGGCTCAGAAAACAGCGCTCGAGGTGCGGACTTGCGTTCACTC
GGAGTGCGATGGTCCCTAGGTCGCAAAACAAATGG---GACGCACCGATACAGGCGGCGG
TCTCGGCTCTAAACCAGTCGAGGTCGTCGTCTTAGCTAA-----CATATAACACGGTAAT
GGTTT-AATGGGTTTAA-GCCTC--------GCTTCTTAGAGGGACTACC-GAC---CGC
CAGTCGGTGG-AAGATCAAGGCAATAACAGGT----------------------------
------------------------------------------------------------
------------------------------------------------------------
------------------------------------------------------------
------------------------------------------------------------
------------------------------------------------------------
------------------------------------------------------------
------------------------------------------------------------
------------------------------------------------------------
------------------------------------------------------------
------------------------------------------------------------
------------------------------------------------------------
-----------------------CTGT-GATGCCCT------------------------
------------------------------------------------------------
------------------------------------------------------------
------------------------------------------------------------
------------------------------------------------------------
------------------------------------------------------------
------------------------------------------------------------
-------------TCGATGT--TCTCGGCCACACGCGCGCTACACTGAACGCTG--TAAT
AGGTCTAAGCTACGAGGAGGAACTCGCTAATTAACTTA-CCGATCCTCTT-AGTAGTGGA
GCCAAGGCC--------GAAAGGCC-GAGGTAATCCG--TAACAGCGTTCGT-GCTAGGG
ATAATCGATTGTAATTATCCG-------ATTTAAACGAGGAATTCCTAGTAAGCGCG-GT
TCACTACACCGCGCTGACTACGTCCCTATTTT----------------------------
------------------------------------------------------------
------------------------------------------------------------
------------------------------------------------------------
------------------------------------------------------------
------------------------------------------------------------
------------------------------------------------------------
------------------------------------------------------------
------------------------------------------------------------
-------------------------TTGTACACACCGCCCGTCGCTCCTACCGATCGAAC
AGTAGGGTGAAGCCGATCGAGC-GGCTGGTCTC---------------------------
------------------------------------------------------------
------------------------------------------------------------
------------------------------------------------------------
------------------------------------------------------------
------------------------------------------------------------
------------------------------------------------------------
------------------------------------------------------------
------------------------------------------------------------
------------------------------------------------------------
------------------------------------------------------------
------------------------------------------------------------
------------------------------------------------------------
------------------------------------------------------------
------------------------------------------------------------
------------------------------------------------------------
------------------------------------------------------------
------------------------------------------------------------
------------------------------------------------------------
------------------------------------------------------------
------------------------------------------------------------
------------------------------------------------------------
------------------------------------------------------------
------------------------------------------------------------
------------------------------------------------------------
------------------------------------------------------------
------------------------------------------------------------
------------------------------------------------------------
------------------------------------------------------------
------------------------------------------------------------
------------------------------------------------------------
------------------------------------------------------------
--------------------------------------------------GCGGACGACC
GCTTCGGCGGTCTGGCGACGACCTTA--AGTCGTCTTTGGTCG--TTCAGCCTCCGT--
>Cornuvia_serpula_JX481285
-------------------------------n----------------------------
------------------------------------------------------------
-----------------------------------CGAACGGCTCCGTATATCTGCCATA
T-TCCGCCGCCCATAT--------------------------------------------
------------------------------------------------------------
------------------------------------------------------------
------------------------------------------------------CCA-GC
GGCATAAC-CACGGTAATTCTG-TGGCTAATACGTGT-ACTACGGCGGGCGCCCCTCAGG
GGTGCGCCCCCGGTCTTGCCGAGCATACTAACGGCGGGG----CAACCCGA---------
------------------------------------------------------------
------------------------------------------------------------
------------------------------------------------------------
------------------------------------------------------------
-----------------------------------CCGCGTGAGAGCTGGCAAGGGTAC-
CTG---AC-CGCA-GCAG------------------------------------------
------------------------------------------------------------
-------------------------CAGCTG--CGGC---CCGCGCGATGAGCGCCAGAC
CTATCA-ACT-AGATGCCCAGGCATTGCCTGGC-CATGGTTATAACGGGTACAGAGGATC
AGGGTTCGGTCCTGGAGAGGTAGCCTGAGAAATCGCTACCACTTCTAAGGAAGGCAGCAG
GCGCGCAACGTTCCCAATGGGG---------ATAC---------CCTGAGGACGTGAAGG
GACATACCAATGCCCGGCCC--TCAA-----AGCCGGGCAATTGG-AATGGGGGACCTTT
AAACC-CCACACCG-------AGTAACAATTGGAGGACAAGTCTGGT-------------
------------------------------------------------------------
------------------------------------------------------------
------------------------------------------------------------
------------------------------------------------------------
------------------------------------------------------------
------------------------------------------------------------
------------------------------------------------------------
------------------------------------------------------------
------------------------------------------------------------
------------------------------------------------------------
------------------------------------------------------------
------------------------------------------------------------
------------------------------------------------------------
------------------------------------------------------------
------------------------------------------------------------
------------------------------------------------------------
------------------------------------------------------------
------------------------------------------------------------
--------------------------------------------------------GCCA
GCACCCGCG---------------------------------------------------
------------------------------------------------------------
------------------------------------------------------------
------------------------------------------------------------
------------------------------------------------------------
------------------------------------------------------------
------------------------------------------------------------
------------------------------------------------------------
------------------------------------------------------------
------------------------------------------------------------
------------------------------------------------------------
------------------------------------------------------------
------------------------------------------------------------
------------------------------------------------------------
------------------------------------------------------------
------------------------------------------------------------
------------------------------------------------------------
------------------------------------------------------------
------------------------------------------------------------
------------------------------------------------------------
--------------------------------------GTAATTCCAGCTCCAATAGCAT
CTAATTGAGTTGTTGCAGTTAAAACGCTCGTAGTTCAA-ACCGG--TGCGCCCACCGGCG
GCC---------------------CAGTACTGCGGGTGCCCGGTGCCCCTACTTCTTGGG
-TGGCGC-CGGGCCCCGTGGGGCCGGCTGTCTGGT-------------------------
-------------------------------GGCCACTACTACGC-----TGGGGGGTCA
CGCCGGGCGGGGCTTTAGTGCCCTGCTCGGTTG---------------------------
------------------------------------------------------------
------------------------------------------------------------
------------------------------------------------------------
------------------------------------------------------------
------------------------------------------------------------
-----------------------------------------------CCCCCGGCTCCTT
ACTTTGAA--TAAATGTCAGTGCTCCAAGCAGGCCGTA-----ACGGCCC----------
--------------------------------TTGAA-ACCCGC-AGCAAAGAATAACAG
AACAGGGACCTC-CCTGCT-----CGTTGGTGCAGGTC----------------------
------------------------------------------------------------
-----------------------------------------GGGTCAA-TGATCGATAGG
GGGGATCGGGGTGGGCCACATGGCGGGGGTAGGGGTGAAATCCGTTGATCCTCGCCAGGT
GAACTAGAGCGAAAGCAGCC-CACAAGTACCCGCCCTTTGATCAAGAACGAAAGTCTGGG
GATCGAAGATGAT-----------------------------------------------
------------------------------------------------------------
------------------------------------------------------------
------------------------------------------------------------
------------------------------------------------------------
------------------------------------------------------------
------------------------------------------------------------
------------------------------------------------------------
------------------------------------------------------------
------------------------------------------------------------
------------------------------------------------------------
------------------------------------------------------------
------------------------------------------------------------
------------------------------------------------------------
------------------------------------------------------------
------------------------------------------------------------
------------------------------------------------------------
---CAGATACCATCGTAGTCCAGACCCTAAATCATGCCGGCCATGGATGGGCCCT-CGTC
CATCC------CGACCCGGCCCGGACCTTAT--------------GGGAAACCAG-AAGC
GTTTGGGCTCCGGGGGGAGTATGGTCGCAAGACTGAAACT--------------------
------------------------------------------------------------
------------------------------------------------------------
------------------------------------------------------------
------------------------------------------------------------
------------------------------------------------------------
------------------------------------------------------------
------------------------------------------------------------
------------------------------------------------------------
------------------------------------------------------------
------------------------------------------------------------
------------------------------------------------------------
------------------------------------------------------------
------------------------------------------------------------
---------------------------------------------------------TAA
AGGAATTGACGGAAGAG-CACACAAGGAGT------------------------------
------------------------------------------------------------
------------------------------------------------------------
------------------------------------------------------------
------------------------------------------------------------
----------------------------GGAGCCTGCGGCT-------------------
------------------------------------------------------------
------------------------------------------------------------
------------------------------------------------------------
------------------------------------------------------------
------------------------------------------------------------
------------------------------------------------------------
------------------------------------------------------------
------------------------------------------------------------
------------------------------------------------------------
------------------------------------------------------------
------------------------------------------------------------
------------------------------------------------------------
------------------------------------------------------------
------------------------------------------------------------
------------------------------------------------------------
------------------------------------------------------------
------------------------------------------------------------
------------------------------------------------------------
------------------------------------------------------------
------------------------------------------------------------
------------------------------------------------------------
------------------------------------------------------------
------------------------------------------------------------
------------------------------------------------------------
------------------------------------------------------------
--------------------------------------TAATTTGACTCAACACGGGGAA
ACTCACTAGGGCAAGAGGGGGGTAGGATGGACAGCCGATCAGGGCTTTCCTGA--TTCCT
CCAGTGGTGGTGCATGGTCGT---------------------------------------
------------------------------------------------------------
------------------------------------------------------------
------------------------------------------------------------
------------------------------------------------------------
------------------------------------------------------------
------------------------------------------------------------
------------------------------------------------------------
------------------------------------------------------------
---------TCTTAGTTCGTGGA-TTGATTTGTCTGGTTTATTCCGCTAACGAGCGAGAA
CCCGCCCTCTCGTGGTTAGGT--CCCCG--GGCAC----GCCGG----ACCCCACGCCGC
AAGGCAGG----------------------------------------------------
------------------------------------------------------------
-------------------------------------------------GGACTGGCTGA
AAACGCCCGTGGGCA---------------------------------------------
--------------------------------CGTTCCGGA-GGGACCGGCTTT---GAC
AAGGAGCCGG-CAGT--GGGTCAATAACAGGT----------------------------
------------------------------------------------------------
------------------------------------------------------------
------------------------------------------------------------
------------------------------------------------------------
------------------------------------------------------------
------------------------------------------------------------
------------------------------------------------------------
------------------------------------------------------------
------------------------------------------------------------
------------------------------------------------------------
------------------------------------------------------------
-----------------------CAGT-GATGCCCT------------------------
------------------------------------------------------------
------------------------------------------------------------
------------------------------------------------------------
------------------------------------------------------------
------------------------------------------------------------
------------------------------------------------------------
-------------TAGATGC--TCTAGGCCGCACGCGCGCTACAATGGGGTGAG--TACC
GGGCCCTT----------------------------------------------------
-CCTGCACC-------TACTGGTCG-CGGGGAATCCTGGGAAAGTGCCCCGT-ATCCGGG
ATGGCGCCGTGTAACTCGGC--------GCCTCAACAAGGAATTTCTAGTAGTCGTG-GG
TCACCAGCCCGCGACGATTCTGTCCCTGCTCT----------------------------
------------------------------------------------------------
------------------------------------------------------------
------------------------------------------------------------
------------------------------------------------------------
------------------------------------------------------------
------------------------------------------------------------
------------------------------------------------------------
------------------------------------------------------------
-------------------------TTGTACACACCGCCCGTCGCTCCTACCGATTGGGC
TGCACGGTGAGTTGCCCGGAGTATGGCCGGCCCG--------------------------
------------------------------------------------------------
------------------------------------------------------------
------------------------------------------------------------
------------------------------------------------------------
------------------------------------------------------------
------------------------------------------------------------
------------------------------------------------------------
------------------------------------------------------------
------------------------------------------------------------
------------------------------------------------------------
------------------------------------------------------------
------------------------------------------------------------
------------------------------------------------------------
------------------------------------------------------------
------------------------------------------------------------
------------------------------------------------------------
------------------------------------------------------------
------------------------------------------------------------
------------------------------------------------------------
------------------------------------------------------------
------------------------------------------------------------
------------------------------------------------------------
------------------------------------------------------------
------------------------------------------------------------
------------------------------------------------------------
------------------------------------------------------------
------------------------------------------------------------
------------------------------------------------------------
------------------------------------------------------------
------------------------------------------------------------
------------------------------------------------------------
------------------------------------------------------------
----------------------CAAGGGCCGGTCCGAAGGGAG--GCGAACCCTGCGGCC
TAGAGGAAGGAGAAGTCG
>Cribraria_argillacea_EF513176
-------------------------------n----------------------------
------------------------------------------------------------
----------------------------GAATCTGCGTAAGGCTCCACAAACCTGTTATA
A-CCTTCCCGGTATTGGTCGCAGAGATTATTATTGGGGACTTCGTCTTCCATAGTTCGCT
GTGG--------------------------------------------------------
------------------------------------------------------------
------------------------------------------------------TAC-AC
GG-ATATCCGATGGTAATTCTA-CGGCTAATACGTGC-TCAGTATCCTTCATTTCATCTA
GGATTCGTCTTGGGTGGGGTGATGGGTGCTGGAGATTCATTTTATTTAGAACCCATATCC
TTAACTGGATATTGCTAACTCTATAAGTTGAACCTCACCTCCCGCTCATCGCGTATTTGC
TTCCTTCTTGTAGTTGTAGGTATCTTGTATATCTCCTTCTTCAAGGGTGAACT-------
------------------------------------------------------------
------------------------------------------------------------
------------------------------------------------------------
------------------------------------------------------------
------------------------------------------------------------
-------------------------CTTACT--CGGT---GTATCGGAAGGATTTCAGAT
CTATCATACT-AGTGAACAGGGTATCCACCTGC-TCAGGTTATAACAGATACGGGGAATC
AGGGCTCGATTCCGGAGAGGTAGCCTCAAAAACCGCTTCCACGTCTAAGGATGGCAGCAG
GCGCGAAACGTTTCCAATAACTA--------AGTT---------GTTGAGAACGTTATGA
AGCATATGGAACTGGGCT----ATTCTA---GTCCAGAAAATCCG-CATGAGGGCATTCT
AGACC-ACTCACCA-------AGTAACAATTAGTGGGAAAGTCTGGT-------------
------------------------------------------------------------
------------------------------------------------------------
------------------------------------------------------------
------------------------------------------------------------
------------------------------------------------------------
------------------------------------------------------------
------------------------------------------------------------
------------------------------------------------------------
------------------------------------------------------------
------------------------------------------------------------
------------------------------------------------------------
------------------------------------------------------------
------------------------------------------------------------
------------------------------------------------------------
------------------------------------------------------------
------------------------------------------------------------
------------------------------------------------------------
------------------------------------------------------------
--------------------------------------------------------GCCA
GCATCCGCG---------------------------------------------------
------------------------------------------------------------
------------------------------------------------------------
------------------------------------------------------------
------------------------------------------------------------
------------------------------------------------------------
------------------------------------------------------------
------------------------------------------------------------
------------------------------------------------------------
------------------------------------------------------------
------------------------------------------------------------
------------------------------------------------------------
------------------------------------------------------------
------------------------------------------------------------
------------------------------------------------------------
------------------------------------------------------------
------------------------------------------------------------
------------------------------------------------------------
------------------------------------------------------------
------------------------------------------------------------
--------------------------------------GTAATTCCAGCACTGATAGCAT
ATCTTTAAATTGTTGCAGTTGAAGCGCTCGTAGCCTAA-CATCG--GTCGAGTTCAACTT
ATGGGGATCAGAGATCACTGCCACTTAGGAGTAAGCCTTGGACCTTGGGGTTATGCCGAA
TTCCTTGTCACCCAGGGGACTGCTCTTATTTGACAGCCTTTGTTTTTCATAGGATGGATG
AGGCCCAACCATTGTTCAGTTCCACCTGGTTATCTTTCACTAGATAGCCAGAGG------
------------------------------------------------------------
------------------------------------------------------------
------------------------------------------------------------
------------------------------------------------------------
------------------------------------------------------------
------------------------------------------------------------
----------------------------------------------GAAAGGGACACTTT
ACCTTGAG--CAAATGAGAATGTTCAAAGTAAGTCTTCT----TC---------------
--------------------------TGACA-TTGGATTAATCTTAGCATGGAATAATTT
GTCTTTTTGATA------------AGTTGGTTCCTTGTCAGA------------------
------------------------------------------------------------
-----------------------------------------GAGGAGGTTGGTTAAGGGG
GATAGCGTGAGTCAACCAAGCTATGGGGCGAGGGGTGAAATCCGTTGACCCTCATAGATT
GACCAAACGCGAAAGCAGTT-GACTATTCTATCCCTTTTGGTCAAGAACGAGAGTGGGGG
GATCGAAAATGAT-----------------------------------------------
------------------------------------------------------------
------------------------------------------------------------
------------------------------------------------------------
------------------------------------------------------------
------------------------------------------------------------
------------------------------------------------------------
------------------------------------------------------------
------------------------------------------------------------
------------------------------------------------------------
------------------------------------------------------------
------------------------------------------------------------
------------------------------------------------------------
------------------------------------------------------------
------------------------------------------------------------
------------------------------------------------------------
------------------------------------------------------------
---TAGATACCGTTGTAGTCCCCACTGTTAAATATGTTGACTATCAGTGAAGTAA-GCTC
TGACTTACTTCCGACTCTCCTCCTTGGTTACTC------------TTTAGACTT--AAGT
GTAA---CCTTGGGGGGAGTATAGTCGCAAGTCTGAAACT--------------------
------------------------------------------------------------
------------------------------------------------------------
------------------------------------------------------------
------------------------------------------------------------
------------------------------------------------------------
------------------------------------------------------------
------------------------------------------------------------
------------------------------------------------------------
------------------------------------------------------------
------------------------------------------------------------
------------------------------------------------------------
------------------------------------------------------------
------------------------------------------------------------
---------------------------------------------------------TAA
AGGAATTGACGGAGGAG-CACACAAGGAGT------------------------------
------------------------------------------------------------
------------------------------------------------------------
------------------------------------------------------------
------------------------------------------------------------
----------------------------GGAACCTGCGGCT-------------------
------------------------------------------------------------
------------------------------------------------------------
------------------------------------------------------------
------------------------------------------------------------
------------------------------------------------------------
------------------------------------------------------------
------------------------------------------------------------
------------------------------------------------------------
------------------------------------------------------------
------------------------------------------------------------
------------------------------------------------------------
------------------------------------------------------------
------------------------------------------------------------
------------------------------------------------------------
------------------------------------------------------------
------------------------------------------------------------
------------------------------------------------------------
------------------------------------------------------------
------------------------------------------------------------
------------------------------------------------------------
------------------------------------------------------------
------------------------------------------------------------
------------------------------------------------------------
------------------------------------------------------------
------------------------------------------------------------
--------------------------------------TAATTTGACTCAACACGCGAAA
CCTTACGGAGATCAAGGTGGA-TTTGATGGACTACT-CACCGAGTTTTCTTGAT-GTCCT
CCAGCGGTGGTGCATGGCCGT---------------------------------------
------------------------------------------------------------
------------------------------------------------------------
------------------------------------------------------------
------------------------------------------------------------
------------------------------------------------------------
------------------------------------------------------------
------------------------------------------------------------
------------------------------------------------------------
---------TCTTAGTTCGTGGA-TTGATCTGTCTGGCTAATTCCGATAACGAACGAGA-
CATACTTCACTCATTAAAGGT---CTGGACGAGAG----ACAAATGATTCATATTCTTCA
CCTCACTTGCCATGATTTTTTGGGGACCCCTGCTTATCGACATCTCACGGTGCTTAGGCA
GATCCCTATTTCTGAGTGGACCACAGGTGTTGTGGGGATTTGAGTTGTTTGGTTCAGA--
------------------------------------------------------------
------------------------------------------------------------
------------------------------TTTTTGTGAGT-GAGACGAACAGT---GAT
AAACTGTTGG-AAGCAGTATGCCATAACAGGT----------------------------
------------------------------------------------------------
------------------------------------------------------------
------------------------------------------------------------
------------------------------------------------------------
------------------------------------------------------------
------------------------------------------------------------
------------------------------------------------------------
------------------------------------------------------------
------------------------------------------------------------
------------------------------------------------------------
------------------------------------------------------------
-----------------------CAGT-GATGCCCC------------------------
------------------------------------------------------------
------------------------------------------------------------
------------------------------------------------------------
------------------------------------------------------------
------------------------------------------------------------
------------------------------------------------------------
-------------TTGATAT--CTCCGGCCGCACGCGCGTTACAATACTCTGATA-AGCT
AGA---------------------------------------------------------
-TCACTGGAA------GAAATTTTT-AGTGAAATCTAGAATCCATCCACTCA-TTCTGGG
ATTGACCTGTGTTCCACTCACGG-----TCATGAACCCGGAATTTCTAGTAGGCGCCAGT
TCACCACACTGCGCCGACTTTGTCCCTGCTCC----------------------------
------------------------------------------------------------
------------------------------------------------------------
------------------------------------------------------------
------------------------------------------------------------
------------------------------------------------------------
------------------------------------------------------------
------------------------------------------------------------
------------------------------------------------------------
-------------------------TTGTACACACCGCCCGTCGCTCCTACCGAT-GAGT
AGCTTGGTGAAGATTCTGGAGAGAGAAGTACCA---------------------------
------------------------------------------------------------
------------------------------------------------------------
------------------------------------------------------------
------------------------------------------------------------
------------------------------------------------------------
------------------------------------------------------------
------------------------------------------------------------
------------------------------------------------------------
------------------------------------------------------------
------------------------------------------------------------
------------------------------------------------------------
------------------------------------------------------------
------------------------------------------------------------
------------------------------------------------------------
------------------------------------------------------------
------------------------------------------------------------
------------------------------------------------------------
------------------------------------------------------------
------------------------------------------------------------
------------------------------------------------------------
------------------------------------------------------------
------------------------------------------------------------
------------------------------------------------------------
------------------------------------------------------------
------------------------------------------------------------
------------------------------------------------------------
------------------------------------------------------------
------------------------------------------------------------
------------------------------------------------------------
------------------------------------------------------------
------------------------------------------------------------
------------CTTTCTGGGGGGCAACTTGGGTTCTTTCATCCTACCTCGGTAGTTTGT
TTTTACTTTCAAGTTCCTTAGAGAGCCCTTTTCTCAAAAGTAT--TTGAACCTAGTTATT
TAGAGGAAGGAGAAGTCGTAACAAGGTAGCCGTAGGTGAACCTG-AGAAGGATCA
>Cribraria_cancellata_EF513177
---------------------CCAGAATTATTACGCTTGTCTCAAAGATT-AAGCCATGC
ATGCTTTCC-ATATAAAG-AAAAGGCAGTGTTGCGACT----------------------
-------------------------GCTAAATCTGCGAAAAGCTCCGTATACCTGTGTTA
A-CCTTCCTGGTATGTGTTCCTGGGTTATCTTGCTCCTTCGGGGGTGGGATCGATCCAGG
ATCAATTTCTTATAATGCCCATCAAAAGGCCTGTAGGATTCAGTCGGAAGAC--------
------------------------------------------------------------
------------------------------------------------------TAA-AC
GG-ATATCCGATGGTAATTCTA-CGGCCAATACGTGA-ACCACGTTCTGAGGGAGTTTTG
TCCTTACCTAGGCAATTATGGGGGTGGGATTGTTTCTTCTTTTTTCTCTCCTGGAAGCCT
TTCGGGGTTGAAAGGGGGATTATTGAGGTTAAGCAGCTTATCTCTCGCTTGGGTATGGGG
CAAACTTGCTTCGTGATGGGGGTAGAAAACACAAAATCCAGGCATCCCAGAGCTTGTAAG
CCTCTCGAGGCCTTTTCAAGCCTGGAAAGTCGTGAATTGAACCCCATGACAGACCGCTGC
TGTAAAC-----------------------------------------------------
------------------------------------------------------------
------------------------------------------------------------
------------------------------------------------------------
-------------------------AGGCGG--CGGC---AAGCTGGAAGGGATTCAGTC
CTATCA-ACT-AGTAAGCAGGGTATTGTCCTGC-TTAGGTTATAACGGGTACAGAGGATT
CTGGTCTGATCCTGGAGAGGGAGCCTTAAAAACAGCTCCCAGTTCTAAGGAAGGCAGCAG
GCGCGAAACGTTCCCAATGACT---------AACG---------GTTGAGGACGTTAGGA
GACATACCAATGCCGGCTTCATATAAA----ATGTCGGTAATTGG-AATGAGGGTATATT
AGACC-CTGCAAACT------ACAAACGATTAGTGGGAAAGTCTGGT-------------
------------------------------------------------------------
------------------------------------------------------------
------------------------------------------------------------
------------------------------------------------------------
------------------------------------------------------------
------------------------------------------------------------
------------------------------------------------------------
------------------------------------------------------------
------------------------------------------------------------
------------------------------------------------------------
------------------------------------------------------------
------------------------------------------------------------
------------------------------------------------------------
------------------------------------------------------------
------------------------------------------------------------
------------------------------------------------------------
------------------------------------------------------------
------------------------------------------------------------
--------------------------------------------------------GCCA
GCAACCGCG---------------------------------------------------
------------------------------------------------------------
------------------------------------------------------------
------------------------------------------------------------
------------------------------------------------------------
------------------------------------------------------------
------------------------------------------------------------
------------------------------------------------------------
------------------------------------------------------------
------------------------------------------------------------
------------------------------------------------------------
------------------------------------------------------------
------------------------------------------------------------
------------------------------------------------------------
------------------------------------------------------------
------------------------------------------------------------
------------------------------------------------------------
------------------------------------------------------------
------------------------------------------------------------
------------------------------------------------------------
--------------------------------------GTAACTCCAGCACTAATAGCGT
ATTTTTAAATTGTTGCAGTTAAAACGCTCGTAGCCGCA-AATCA--GACTGCAGAGGTTA
AGCGTGGAATGTGGCTCCTTGACAACTCGGTCGTTGGGATTTTGTGCTATCCTGTCTGCG
AGCTCTTCCCTTGCTGGATTTTTGAAGGCTCGGGTTCTTGTGGAAATATAAAGGGATGGT
GCATACTATGGTTCCTTCAGCTGGGGAGGTTGTCCGTCCTCGCGCGCTCACGGTTGTCCC
GAATATGGCCAGGCCAACAGTGCCTTTGCGCCTAGGGGCATATTGTCAGCGGCTTTTGCA
GTACTGATACCTGCCTTTCCTTCCCCTATCCCTTCTCTCCTCCGGGTTACGAAGGTTTAG
GGTTCAAATCTGGCTGCCTTTGAGTAGGTGTCCGGAG-----------------------
------------------------------------------------------------
------------------------------------------------------------
------------------------------------------------------------
----------------------------------------------AGGAAGGGCGTCAT
ACCTTGAG--CAAATTAGAGTGCTCTAGGCAGGTCATGG----GGGGGTAACCTTCC---
--------------------------GGACG-ATGAA-CAATCC-AGCATGGGATATATT
TCCTTTTCATGGTA----------CCTTGACCTCGGCGATGCCTGCTGGGATCGAGG---
------------------------------------------------------------
-----------------------------------------GACCTAC-TGCTGTTTAGG
GGTTGCAGGGGGTAGCCAGACCATGAGGCGAGGGGTGAAATCCGTTGACCCTCGTGGGCT
GAACTAAAGCGAAAGCAGCTTACCCATAATACTCCCGTTGGTCAAGAGCGAAAGTGGAGG
GATCGAAAATGAT-----------------------------------------------
------------------------------------------------------------
------------------------------------------------------------
------------------------------------------------------------
------------------------------------------------------------
------------------------------------------------------------
------------------------------------------------------------
------------------------------------------------------------
------------------------------------------------------------
------------------------------------------------------------
------------------------------------------------------------
------------------------------------------------------------
------------------------------------------------------------
------------------------------------------------------------
------------------------------------------------------------
------------------------------------------------------------
------------------------------------------------------------
---TAGATACCGTTGTAGTCTCCACTGTAAAATATGCCGACCCCAGATAGGGTCA-CGTC
CCTTTCT----GGACTCTCCCTGGATGCCG---------------GAGAAATTA--GAG-
--CTGG-CTCTGGGGGGAGTATGGTCTCAAGGCTGAAACT--------------------
------------------------------------------------------------
------------------------------------------------------------
------------------------------------------------------------
------------------------------------------------------------
------------------------------------------------------------
------------------------------------------------------------
------------------------------------------------------------
------------------------------------------------------------
------------------------------------------------------------
------------------------------------------------------------
------------------------------------------------------------
------------------------------------------------------------
------------------------------------------------------------
---------------------------------------------------------TAA
AGGAATTGACGGAACAA-CACACCAGTAGT------------------------------
------------------------------------------------------------
------------------------------------------------------------
------------------------------------------------------------
------------------------------------------------------------
----------------------------GGAATCTGCGGCT-AGTTCCAATTAGGCCGTT
AAAACAAGCTTCGTTGGAAAGCGGTAAGCTTGATTAGTTGGCAAATACAGAGCCTGGGTT
AAATCTCGGTCTCGAGTATGCTAGCGAGACACCTGGAACGGTGAAAATCCTCAGGAAGTA
GATTATCCTAGGATAACATCGTGGCTAGTCTTAGGTTATCTCCCCTTCATGTAATGGAGG
AGGAGGAATCCTTCTAGACAGCTGTAACGCACGGAAAGGTGTCGGGGGTTACAAGGAAGT
CGGTAACCCCTTAAGGTACGTGCTAACCCCACTCGAAAAGAGTGTTCTAAAAGGAAACCT
GATACAGGTTGAACTTTTAGAAGGCCAATGACCACTGGGATAAATCTCGGTGTGAGGCTG
GTCTTAAGG---------------------------------------------------
------------------------------------------------------------
------------------------------------------------------------
------------------------------------------------------------
------------------------------------------------------------
------------------------------------------------------------
------------------------------------------------------------
------------------------------------------------------------
------------------------------------------------------------
------------------------------------------------------------
------------------------------------------------------------
------------------------------------------------------------
------------------------------------------------------------
------------------------------------------------------------
------------------------------------------------------------
------------------------------------------------------------
------------------------------------------------------------
------------------------------------------------------------
------------------------------------------------------------
--------------------------------------TAATTTGACTCAACACGGGGAA
ACTCACAGGGGTAATATAGGGTTATGAAAGACAGCT-TAAAGAGCTTTCTCGAG-TACCC
TAAGTGGTGGTGCATGGCCGT---------------------------------------
------------------------------------------------------------
------------------------------------------------------------
------------------------------------------------------------
------------------------------------------------------------
------------------------------------------------------------
------------------------------------------------------------
------------------------------------------------------------
------------------------------------------------------------
---------TCTTAGTTCGTGGA-TTGATCTGTCTGGTTAATTCCGCTAACGGACGAGA-
CGACTGTTAC-CATGTTTCCC--AGGGTGTTGAAG----CCTTTCCGTGAATGTCGCCTT
GTTCAGGTAAGTTAGTCTTAACGCTTCTATCGTCGGCGATGCCTTTGTCTTGAGGGGGTT
TCGGCCTCTTTGAGCTGGTTGGTTCGTGGTTTAAGCTTAGGTACGGTCCCTGATCAGCGA
TGGTTTGGATTTTCATCA------------------------------------------
------------------------------------------------------------
------------------------TTTCCCTGTTGGTACATGGTAGCATGGCTCTT-TCA
AAGGGTCCTA-AA----GTCGCAATAACAGGT----------------------------
------------------------------------------------------------
------------------------------------------------------------
------------------------------------------------------------
------------------------------------------------------------
------------------------------------------------------------
------------------------------------------------------------
------------------------------------------------------------
------------------------------------------------------------
------------------------------------------------------------
------------------------------------------------------------
------------------------------------------------------------
-----------------------CAGT-GATGCCCC------------------------
------------------------------------------------------------
------------------------------------------------------------
------------------------------------------------------------
------------------------------------------------------------
------------------------------------------------------------
------------------------------------------------------------
-------------TTGATAC--CTTTGGCTGCACGCGCGTTACAATGGGTGGAAG-GAAC
GGGT--------------------------------------------------------
-TTTCTCCTTGACC--GAAAGGTTC-GTGGGAATCCTGGCAAATCCGTCCAT-ATTTGGG
ATTGA-GTGCTTTAGCGGTGC-------TCATGAACAAGGAATTACTAGTAGGAGCT-GG
TCATCAACCAGCGCCGACTTCGTCCCTGTTGT----------------------------
------------------------------------------------------------
------------------------------------------------------------
------------------------------------------------------------
------------------------------------------------------------
------------------------------------------------------------
------------------------------------------------------------
------------------------------------------------------------
------------------------------------------------------------
-------------------------TTGTACACACCGCCCGTCGCTCCTACCGATTGAGC
GATCTGGTGAAGACTTCGGAACCCTAAACCAGTTCTGAGTTTTTTTCTCAGTAAATCTTT
TCGAGGGATACACTGACAAAAAACCTTGAATTTACCTTGATTCAAGGGGGATTAACCCAC
GCTTTCTTGTTTATGTGATCGGTTAGAGGTTGTATCCCTTTCCCTGAGACCTCGAGGCTA
GGCAAGTTCGAGGCAGCCCATATAGGGATTCTTAAGACCCTGACCGGTTCATGAACAGGA
CAAGCAATGGTTATCTGCCATGCTCTTAAGGTTGATTTGGTTTTCTTCGGTCATTCTCTC
GAAAAGCTGCCTTGATCCAAGGGTGATTAACCTGTAATACCTTTTTTGTTGGGGTCATCA
ACTAAGAGGTTGTGATAGGTTGTTCATCTTTGTTTTGAGACATCCCCTTGACTCAAGGGA
AATTATCCTAACTACCACATAACGATCATCGGTCAAATGATCTCTTCTAGGTGAGTGCAG
GAAAATTTCCCTTGTTTTAAAATATCCCCTTGACTCAAGGGAAATTATCCTAACTACCAC
ATATCGATCATCGGTCAAATGATCTCTTGTGAGTGAGCACAGGAAAATTTCCCTTGTTTT
GAGGGATATTATCCTAACACACTTGAATCGAGGATGTGAATAGTTACAGGCATCATTGTA
TCTCTCTCACGCTCGTCCAACGACTCAAGGGTGATTAACCTACTTTGCTGCCATGTTTCG
CTAGTTGGGAAGGTAAGTCTTATTTACCACCTTCTTCAGTGAAACCGTAAGGTTAGCGCC
AGTGTTGCAAGGGGAAATATCCTAACATACTTGAATCAAGGATCTGGAAAGTTACAGGCT
TCATTGTATCTCTCCATGCTTGGCCAGCGACGCAAAGGGTATTTCGGTCCATACCTACCC
TCACGTTTTTTTTTGTAGAAAAATTTTCTCTTCAAAAAAAAAAGGCCATATTATTGCCCG
GTTATCCCCGAAACCCTAATCCCAGGATTTTCCCGGGGGGTAAGGGGAGGAAATTTTCGG
TCCATACCTACCTTAACAAATTTTTTGTATGGTGAATTTTTTTCCCCTATGCAAAAATGA
GGCTAGGTAGGTTAGCGCTCCTTAAAGGTTGGCCAAAAAAAGGCTCCTTAGGGATGGCTC
TCTTTTGAAGGAAAACAAGAAAGCCTTTTGGGAGGAAGGCAAATTACCCTAAACCCAGTA
TGCTTAAGGGGGGGCTGTTGAGGAGGGAAACACAACAACATATGCCTTTCCCTATTGCGT
GAGCGGGAAGGGTTGGTGATCAGCTGATTTTTTTCCCTTGGCCTTTATTGGTTGGTAGGT
AAGCTGCGCAAATCACTTGATTGACTGTATATGGAGTATCCGCGCTTCAACCCAATAGCA
CTCAGGGGAAGGGGTGGTGGTTTGGCCATCACTATTAACTGGAACCGAAAATGCGGGTGT
CCCGTTACTCATATGACAGCTCATGATGGGGATTTGATCGGTTACTGATTCTGGTTGAAG
AAAATAGGGGTTCAGTTGATTCACCTTTTGGGATACTAAGGGCAATTTGGTATCCTGACT
CTGTACCAAACACGGGATAGGATGTGTGCGTAGTTGTTTTGTTGTCCGCTTGGTTTTGAG
GTTTTGCCTTGAGACTTCCCTTAGGTAAAGGGAAAATAACCACCTGTATGCTTGATTTTG
TTTCATGGTCAGGGGACGTGAGGGTGCAGTTCGGTTTCGAGCTGCCTTGCTCTCGTTAAG
TTCCCGGTGATTCAAGGGATATAATCCATCATGCATTTGTTTCATGAGCAGGGGATATGA
GGGTGCAGTACTTTTTGGCAATTACTGCCTTGCTCTCGTTAAGTTCCCGGTGATTCAAGG
GAGGTTACTTAGCTTATCCTATAGGTGCTTAGAGGAGAAGGACAAGTGCGTATGGGCATT
TTTCCCTGCATATCCCAGCTAGTGGTAGCTGGATGGGCTGAGAAAATATTGCTTGCTTAT
CCTATTCCTTGTTTGTCCTATGCCTATCGTTTAGCGAAGGAGT--TTGAACCAGGTTG-C
TAGAGGAAGGAGAAGTCGTAACAAGGTAACCTG
>Cribraria_tenella_JX481286
------------------------------ATATGCTTGTTTCCAAGATT-AAGCCATGC
ATGCCTTTT-GAATAGCT-GTAGAAATCGCTACTTATAACTAAGTGGTGTACG-------
--------------------------GCAAATCTGCGAATAGCTCCGTATATCTGTGATA
A-CCCTGCTGATAAATATTAAAAGTTCACTAGCATAATCTAGTGAGTCAGCCTGTTATTT
CCTCCTTGGAGGAGATGACTACAAATCTTAATTTGGGACTGATATTTCAGTAACTTTTTA
TCTTTTGTTGTGCTTACT------------------------------------------
------------------------------------------------------TAC-AT
GG-ATATCCGACGGTAATTCTG-CGGCTAATACATGC-TTTCTTGATAGCTCAAGGTATT
ATTTATGGCCTTCTCTAACAGAGAAAGCCCTCTAATTTTAATGCTAGCTGTCATGGAGGA
CTACCTCCTTGAACCCTTACCTTAATTTGGTATGCAACACTCTTTTACTGAGTGAATATC
TCTCCTTGACTAACTGGTACGTTCCCCCTATTGTTACATCGTTTTCTTTTAGGGGG----
------------------------------------------------------------
------------------------------------------------------------
------------------------------------------------------------
------------------------------------------------------------
------------------------------------------------------------
-------------------------TTTCTC--CGGT---AAATTAGAGGGGTTTCAGCT
CTATCA-ACT-GTTGAGCAGGGTATTGACCTGT-TCAGGTGATCACGGATACAGAGAATC
AGGGCTCGATTCTGGAGAGGAAGCTTAAAAATCCGCTTCTACTTCTAAGGAAGGCAGCAG
GCGCGAAACGTTCCCAATAACTGCCCTATACACAG---------GTCGAGGACGTTAGGA
AACATACGGAACTGGGCT----ATTAT----GGCTCAGACATTCG-GATGAGGGCAAAAT
AGAAC-TCTCACCT-------AGTAACAATTAGTGGGAAAGTCTGGT-------------
------------------------------------------------------------
------------------------------------------------------------
------------------------------------------------------------
------------------------------------------------------------
------------------------------------------------------------
------------------------------------------------------------
------------------------------------------------------------
------------------------------------------------------------
------------------------------------------------------------
------------------------------------------------------------
------------------------------------------------------------
------------------------------------------------------------
------------------------------------------------------------
------------------------------------------------------------
------------------------------------------------------------
------------------------------------------------------------
------------------------------------------------------------
------------------------------------------------------------
--------------------------------------------------------GCCA
GCAACCGCG---------------------------------------------------
------------------------------------------------------------
------------------------------------------------------------
------------------------------------------------------------
------------------------------------------------------------
------------------------------------------------------------
------------------------------------------------------------
------------------------------------------------------------
------------------------------------------------------------
------------------------------------------------------------
------------------------------------------------------------
------------------------------------------------------------
------------------------------------------------------------
------------------------------------------------------------
------------------------------------------------------------
------------------------------------------------------------
------------------------------------------------------------
------------------------------------------------------------
------------------------------------------------------------
------------------------------------------------------------
--------------------------------------GTAATTCCAGCACTAAGAGCAT
ATTATTATTTTGTTGCATTTAAAACGCTCGTAGTCCAT-TCTCG--GCCAAAATGAGGCT
TCCTAACGGAGTATAAGTAGAACGTCAAGCAAGGCCCGAACTCGTTTGGGGTAGCCTACT
GGTCCACTTCCTTATATCTTCTCCTGTGGAGGCTGCAGTGGAGGCCAAAACGCGCTCTGC
TTGTTAGGTCAGACTTTAACTAGACTGGCTGAGC--------------------------
------------------------------------------------------------
------------------------------------------------------------
------------------------------------------------------------
------------------------------------------------------------
------------------------------------------------------------
------------------------------------------------------------
----------------------------------------------AGGTAAAGCATCCT
ACCTTGAG--CAAATTAGCTTGCTTAAAGCAGGTCTTTC----CCATT------------
--------------------------AGACAAATGAA-TATTAC-AGCATGGGATAACAC
ATCTCCTGGACA------------AGTTGGTTCTGTGTTTTGAGCACAGGA---------
------------------------------------------------------------
-----------------------------------------GAAGTAA-CGTTTAAAAGG
AGTTGAGGGGGCCAGCCAAACTATTGGGCGAGGGGTGAAATCCGCTGACCCTAATGGGTT
GAACTCAAGCGAAAGCAGCC-GGCTACTATGCTCCTGTTGATCAAGAACGATAGTCGGGG
GATCGAAAATGAT-----------------------------------------------
------------------------------------------------------------
------------------------------------------------------------
------------------------------------------------------------
------------------------------------------------------------
------------------------------------------------------------
------------------------------------------------------------
------------------------------------------------------------
------------------------------------------------------------
------------------------------------------------------------
------------------------------------------------------------
------------------------------------------------------------
------------------------------------------------------------
------------------------------------------------------------
------------------------------------------------------------
------------------------------------------------------------
------------------------------------------------------------
---TAGATACCGTTGTAGTCCCTTCTGTAAAATCTGCCGACCACAGTTAGAGTAA-GCTC
TTTTTC-----TGACTCTCCCTGAATGCCA---------------GGTAAACTCTTAAGT
A---GGGCTATGGGGGGAGTATGG------------------------------------
------------------------------------------------------------
------------------------------------------------------------
------------------------------------------------------------
------------------------------------------------------------
------------------------------------------------------------
------------------------------------------------------------
------------------------------------------------------------
------------------------------------------------------------
------------------------------------------------------------
------------------------------------------------------------
------------------------------------------------------------
------------------------------------------------------------
-------------------------------------
>Cribraria_violacea_JX481287
-----AACCTGGTTGATTCTGCCAGAAT-AGCATGCTTGTTTCCGAGATT-AAGCCATGC
ATGCCTTCC-GAATAGCC-GGACC------------------------------------
-------------------------GGTAAATCTGCGAAAAGCTCCGTAACACTGTAACA
A-CCCTGCCAGTAACGTTGACCTACTTCGGTGGGC-------------------------
------------------------------------------------------------
------------------------------------------------------------
------------------------------------------------------AAC-AT
GG-ATATCCGGTGGCAATTCTA-CGGCTAATACGTGA-ACCCAAAGGGCCCGAGGCACCA
GGGGTCCGGGGTCGCAAGGCAACGAGCGTCCCCGGGCCCCCGCCACGGGTCCGTCTGGGG
GGCCACCAGAGTCCCGCACCCTTGATTGGGCGCGTCAAAATCACCTTCGGGTGAGCCACT
CCCAGACTGACCGGTACCGTGGGGGTCCTCAAAGACCATCCGC-----------------
------------------------------------------------------------
------------------------------------------------------------
------------------------------------------------------------
------------------------------------------------------------
------------------------------------------------------------
-------------------------GGCTAC--GGGC---GGGCTGGAGGGGTTTCAGAC
CTATCA-ACT-AGTAGCCAGGGTATTGTCCTGA-CTAGGTGATAACGGGTACAGAGGATC
AGGGCCCGATCCTGGAGAGGTAGCCTTAAAAACCGCTCCCACTTCTAAGGATGGCAGCAG
GCGCGAAACGTCCCCCATGACT---------AAGT---------GTCGAGGGCGTTAGGA
AACATACCAATATCGGGT----AAATTTTA-AGCTCGGTAATTGG-GATGAGGGAAATTT
AGATA-CCTCACCA-------AGTATCAATTAGTGGGAAAGTCTGGT-------------
------------------------------------------------------------
------------------------------------------------------------
------------------------------------------------------------
------------------------------------------------------------
------------------------------------------------------------
------------------------------------------------------------
------------------------------------------------------------
------------------------------------------------------------
------------------------------------------------------------
------------------------------------------------------------
------------------------------------------------------------
------------------------------------------------------------
------------------------------------------------------------
------------------------------------------------------------
------------------------------------------------------------
------------------------------------------------------------
------------------------------------------------------------
------------------------------------------------------------
--------------------------------------------------------GCCA
GCATCCGCG---------------------------------------------------
------------------------------------------------------------
------------------------------------------------------------
------------------------------------------------------------
------------------------------------------------------------
------------------------------------------------------------
------------------------------------------------------------
------------------------------------------------------------
------------------------------------------------------------
------------------------------------------------------------
------------------------------------------------------------
------------------------------------------------------------
------------------------------------------------------------
------------------------------------------------------------
------------------------------------------------------------
------------------------------------------------------------
------------------------------------------------------------
------------------------------------------------------------
------------------------------------------------------------
------------------------------------------------------------
--------------------------------------GTAATTCCAGCACTAATAGCAT
GTTATTAAGTTGTTGCAGTTGAAACGCTCGTAGTCAGG-CACGA--ACCATGCCGAGACC
AGCGGTCCTTCCGCCATGCTCCACCCCAGCGGCGTCCCCCCCTCTGCCTTCGCGGCCTTG
GGGCTTGGTCCCGTGGGGTTCCCCAAAAGGATTGCACTCTATGAGTCAAGCGAGCCGCCG
AAGCTAAGATCGCTGGCAGTACTCGTGGTTCACCCAGGTCCGGCGCTCGGGCAGGTCTTT
AGTTAGGCCTTTGCTTGG------------------------------------------
------------------------------------------------------------
------------------------------------------------------------
------------------------------------------------------------
------------------------------------------------------------
------------------------------------------------------------
----------------------------------------------GTGCCGGGCGTCGT
ACCTTGAGAGCAACCTAGTGTGCTTCAAGCAGGTCAGTT---------------------
--------------------------CGACC-GTGAA-TATTCC-AGCCGGGAATACCCT
TTTCCCCCTCTATGGGCG------AGCTGGTACTCACGCCG-------------------
------------------------------------------------------------
-----------------------------------------GGGGCAT-GTGCCAAAGGA
GGTGACGGGGGTCGGTCAAACCACGGGGCGAGGGGTGAAATCCGGTGACCCTCGTGAGTT
GTCCCAAAGCGAAAGCAGCC-GACTACTCTACCTTCGTTGATCAAGAACGAGAGTGGGGG
GAACAAAATGGAT-----------------------------------------------
------------------------------------------------------------
------------------------------------------------------------
------------------------------------------------------------
------------------------------------------------------------
------------------------------------------------------------
------------------------------------------------------------
------------------------------------------------------------
------------------------------------------------------------
------------------------------------------------------------
------------------------------------------------------------
------------------------------------------------------------
------------------------------------------------------------
------------------------------------------------------------
------------------------------------------------------------
------------------------------------------------------------
------------------------------------------------------------
---TAGAGACCCATGTAGTCTCCACTGTAAAACCTGCCGACCGCGGATGGGGCTC-CGTC
CGAAT------TGACTTGCCCTGGACTTCC---------------AGGAAACTA--GAGT
TTCTGGGCTCTGGGGGGAGTATGGTTGCAAGAACGAAACT--------------------
------------------------------------------------------------
------------------------------------------------------------
------------------------------------------------------------
------------------------------------------------------------
------------------------------------------------------------
------------------------------------------------------------
------------------------------------------------------------
------------------------------------------------------------
------------------------------------------------------------
------------------------------------------------------------
------------------------------------------------------------
------------------------------------------------------------
------------------------------------------------------------
---------------------------------------------------------TAA
AGGAATTGACGGAAGAG-CACACAAGAAGT------------------------------
------------------------------------------------------------
------------------------------------------------------------
------------------------------------------------------------
------------------------------------------------------------
----------------------------GGAACCTGCGGCTTAAAAGATTAGGCCGCTAG
AGCAACGTCCCGAACCAACGTTGCTAGTCGGACCGCGAGGCCCCCCCCCCCCCCCCCTTC
CCTAGGGGAAGGGGGGGAAGGGTTGGAAAAAAAAAAAGGGGGGTTCCGGGGCCGGGGAAC
CCCTTAATTTTGGGGAAACCCCTTTTGGGGGGACCTTCCCCCCCCCCCCCCAAAGGGGGA
AAAATTAGGGAATTCCCAACCCCTTTTAGGGGGGAAAAACCCCCTTCCTTTGGGTTTTTG
GGAAAAAACTTGGTTCGGGAAAAAGGGTTTTGAAAAAAGGGGGGGTCCCAAATTTTCGTC
CTTGCTTAAAAATGGTTTTCCCCCCCCCCATTCCCCTTTTTGGGGAATCCCGGGTTTTTT
TCCCCGGCCCCCCTGGGGTTGCTTTTCAAAAAAAAAAGGGGGGGGGGGGGGAAACCCCCT
TTCCAAAGGGCCCGGGAAAAGGGTCCCCCTTTGGGCCAAAAAAAAGGGGGATTCAACCCG
AAAAAAAAGGACTCTTGGGGCCCCCGGAAAAAAAGGACCCCCGGGGCCCCCGGGGGGGTC
CCTTTCCCGGGGGGGAATGGGTGGGGGTCCCCCTCTTCTCCAAACAAGGGTTGGTATCAA
CCCGAAAAAGGGAAATTCTTGGGCCCCCGGGGGGGTCCCCTGCCCGGGGGGGATTGGGGG
GGGGTTTTCCCTTGGTTTTCCCAAGGGATTTGGTTTTTTCCGGAAAAGGGGCCCTCCTTA
ACAAAAGGCTTTCCGAATAACCCCGAAAAACCCCCTGCCTAAAGGTGTCCAAGCCCGGGG
TTCCCCCGGGAAAGGGGCCCCTCGGGGCCCAAAAAAAAAAAAAAAGGATCAAGCTTAAAC
CCGGGGACGGTCCCGGTCCCGATGATGGACGGGTACACGGGTCCGCCTCGACGGTGGTAA
AACACGGCCACGGAGCTGGTAGAGAACTCCGTGGCCGAAGGACAAGGGATGAACACACAC
TTAAGATATAGTCGGACCCACCTGAGAGGGTGCTCCCAGACAAAGCCGAGTCAGCGGCCT
GAGCTGGGAGGAAGCGAGTCCCCTCCCCCCAATAAGTAGGGCTGGGCGGGAGGGGCAGCT
GGGGAGCCCAAG------------------------------------------------
------------------------------------------------------------
------------------------------------------------------------
------------------------------------------------------------
------------------------------------------------------------
------------------------------------------------------------
------------------------------------------------------------
--------------------------------------TAATTTGACTCAACACGGGGCA
TCTCACTGGTACCGAGGGTGG-TATGATTGACGGCC-TGGAGGGCTTTCATGAA-ATCAC
CCGGCGGTGGTGCATGGCCGT---------------------------------------
------------------------------------------------------------
------------------------------------------------------------
------------------------------------------------------------
------------------------------------------------------------
------------------------------------------------------------
------------------------------------------------------------
------------------------------------------------------------
------------------------------------------------------------
---------TCTTAGTTCGTGGA-GTGATCTGTCAGGTCAATTCCGTTAACGGACGAGA-
CAGGAAGTTT-TACGTTAGTC---CGGCGTGATAA----CCCGCGCCCGGCCGGTCCATA
CAGCCCGGGGCCCGCAAGGTGTCCCCGCGTGGCAGTCGTGGGGGTCGGGCGTGCATGCCG
G-----------------------------------------------------------
------------------------------------------------------------
------------------------------------------------------------
---------------------TTC-------CTACGTGATT-GACTGGCGTCGT---GAA
GACGTAGGAA-GTAC--CCTGCAATAACAGGT----------------------------
------------------------------------------------------------
------------------------------------------------------------
------------------------------------------------------------
------------------------------------------------------------
------------------------------------------------------------
------------------------------------------------------------
------------------------------------------------------------
------------------------------------------------------------
------------------------------------------------------------
------------------------------------------------------------
------------------------------------------------------------
-----------------------CAGT-GATGCCCC------------------------
------------------------------------------------------------
------------------------------------------------------------
------------------------------------------------------------
------------------------------------------------------------
------------------------------------------------------------
------------------------------------------------------------
-------------TAGATGT--ACCAGGCTGCACGCGCGTTACAGTGCGGCCCACCAGCC
GGG---------------------------------------------------------
-TCTAGGCCCCCC---TCAAGGGCG-CGTCGGACCCCGGAGGCTACCGCACG-AGTTGGG
ACCGGTGAGTGTTAAACTTAC-------CGTTCAACCCGGAATTTCTGGTAAGCGCG-TG
TCACCAGCGCGCGCTGACTAAGTCCCTGCTCT----------------------------
------------------------------------------------------------
------------------------------------------------------------
------------------------------------------------------------
------------------------------------------------------------
------------------------------------------------------------
------------------------------------------------------------
------------------------------------------------------------
------------------------------------------------------------
-------------------------TTGTGCACACCGCCCGTCGCTCCTACCGATTGAGT
GATCAGGTGAAGAGGTTGGACCCGCGTGCCGGATCACCCTGGTTCACTCCAGGGCCCGGT
GCCGG-------------------------------------------------------
------------------------------------------------------------
------------------------------------------------------------
------------------------------------------------------------
------------------------------------------------------------
------------------------------------------------------------
------------------------------------------------------------
------------------------------------------------------------
------------------------------------------------------------
------------------------------------------------------------
------------------------------------------------------------
------------------------------------------------------------
------------------------------------------------------------
------------------------------------------------------------
------------------------------------------------------------
------------------------------------------------------------
------------------------------------------------------------
------------------------------------------------------------
------------------------------------------------------------
------------------------------------------------------------
------------------------------------------------------------
------------------------------------------------------------
------------------------------------------------------------
------------------------------------------------------------
------------------------------------------------------------
------------------------------------------------------------
------------------------------------------------------------
------------------------------------------------------------
------------------------------------------------------------
------------------------------------------------------------
------------------------------------------------------------
------------------------------------------------------------
-----------------------------------CAAGGCTT--TTGAACCTGGCTGCT
TAGAGGAAGGAGAAGTCGTAACAAGGTATCCG
>Cribraria_vulgaris_EF513178
-------------------------------nATGCATGTCT--AAGATT-AAGCCATGC
ATGCGATTT-GATCACCC-TAGGTCTTTTATGGCCCAA----------------------
-------------------------GGTAAATCTGCGAACGGCTCCGTACAACTGTAATA
A-CCTTCCCACTGAGTTTTTGTTTGGTCTCTAGTAGACCCAAGATACAACTAGTTTAAAA
TTCCTACGGGAATTTTTCTGGAAATTAGACTTCTTTTTTGAGGTCTTTTTTTTGGGCTTG
T-----------------------------------------------------------
------------------------------------------------------TAG-AC
GG-TTATCTGATGGTAATTCTA-CGGCTAATACGTGG-TTCTTGAGGAGACTTTTTTTTT
TTTGCCCCAACAAAAAAAAAAATTTTTTTTCCCCCCCCAATTTAAGGGGAAAAAAAAAAC
CCCAATTTTTTTCCCCCCGGGGAATTTTTTC-CCAAAACCTTTTTAACCCGGCCTTAAAA
AATGCCCCATTTTTTGGACCTTTTTTTTGGAAAAAAAAAACCCGGGAAAAACCCACCCCG
GGAAAACCAAGGAAGGATCACACTCGTGTGATTT--------------------------
------------------------------------------------------------
------------------------------------------------------------
------------------------------------------------------------
------------------------------------------------------------
-------------------------TTGTTA--TGGT---GCTGTGGAAGGGTTTCAGTC
CTATCATACC-AGGAAACAGGGTATTGACCTGT-TTAGGTGATTACGGGTACAGGGAATC
AGGGCTCGATTCTGGAGAGGAAGCTCGAAAAACTGCTTCCACTTCTAAGGAAGGCAGCAG
GCGCGAAACGTTCCCAATGACT---------ACTT---------GTTGAGGACGTGATGA
AACATATGGATCTGAATT----ATT------GATTCAGAAATCTA-CATGAGGGAAAATT
AGACC-TCTTTCTC-------GGGAACTATTAGTGGGAAAGTCTGGT-------------
------------------------------------------------------------
------------------------------------------------------------
------------------------------------------------------------
------------------------------------------------------------
------------------------------------------------------------
------------------------------------------------------------
------------------------------------------------------------
------------------------------------------------------------
------------------------------------------------------------
------------------------------------------------------------
------------------------------------------------------------
------------------------------------------------------------
------------------------------------------------------------
------------------------------------------------------------
------------------------------------------------------------
------------------------------------------------------------
------------------------------------------------------------
------------------------------------------------------------
--------------------------------------------------------GCCA
GCAACCGCG---------------------------------------------------
------------------------------------------------------------
------------------------------------------------------------
------------------------------------------------------------
------------------------------------------------------------
------------------------------------------------------------
------------------------------------------------------------
------------------------------------------------------------
------------------------------------------------------------
------------------------------------------------------------
------------------------------------------------------------
------------------------------------------------------------
------------------------------------------------------------
------------------------------------------------------------
------------------------------------------------------------
------------------------------------------------------------
------------------------------------------------------------
------------------------------------------------------------
------------------------------------------------------------
------------------------------------------------------------
--------------------------------------GTAATTCCAGCACTAAGAGTAT
ATTGTTAAGTTGTTGCAGTTGAAACGCTCGTAGTCGAA-ATCGG--GTCTACTGTTAGGT
CGGAGCGGAGTGTATTTTTGGCCTTTGGCCTTGCGGTTCCTGAGTGAGCCGACCTTTAAG
CCCGTTACACCGAGCACTGATCGGCGTAGACCATACCTTCGTCCCACCAATTGAGGTCAA
CTTTAACTAGATGATTTTGGT---------------------------------------
------------------------------------------------------------
------------------------------------------------------------
------------------------------------------------------------
------------------------------------------------------------
------------------------------------------------------------
------------------------------------------------------------
----------------------------------------------CGGGGGACACCTTC
ACCTTGAG--CAAATTAGCGTGCTCAACGCAAGTCTTAT----CTTAAAATCCA------
--------------------------TGACA-CAGAA-TACTAC-AGCATGGTATAACCT
TTTGTTTTCCCCTCTTAAACCTCTCTTTTTTCCCCCCTTTAAAAGTTCCTTATAGGATGT
TAGAGGGGGTCTAAGAGGGGTGGGGAA---------------------------------
-----------------------------------------GACATAT-TTTTGCATGAG
AGTCGAGGGGGCTAGCCATACTTCCAGGCGAGGGGTGAAATCCGATGATCCTGGAGGGGT
GACCTAAAGCGAAAGCAGCT-GGCTACGAGACTTCTATCGATCAAGAACGAGAGTGGGGG
GATCGAAAATGAT-----------------------------------------------
------------------------------------------------------------
------------------------------------------------------------
------------------------------------------------------------
------------------------------------------------------------
------------------------------------------------------------
------------------------------------------------------------
------------------------------------------------------------
------------------------------------------------------------
------------------------------------------------------------
------------------------------------------------------------
------------------------------------------------------------
------------------------------------------------------------
------------------------------------------------------------
------------------------------------------------------------
------------------------------------------------------------
------------------------------------------------------------
---TAGATACCGTTGTAGTCCCTACCGTAAAATCTGCCGACCACAGATGAGGCGC-TGTC
CCATT------TGACTAGCCTCGGATGCTT---------------GGGAAACCATTAAGT
TTCTGGGCTCTGGGGGGAGTATGGTCGCAAGTCTGAAACTAAGACGTCTTAGGTTTCAAA
AGTAGTCTAAGAATTTTTTTTTTCTGCTAGTCCTTTTTCCCACTTAGGGCGACaTCATCA
AATTGCTGGAAAGCCTTTAAAAAGCTCTACATACCAAACCCGTGCTGAAAGGTGGGGGTA
AAAAAAGGTGAAAATTGTACGGCTAAAAACCTAGGGGTAACCAGCAGCAAAGTCCTGTCC
AAAATAATATTTTGTATGGATGTAGTTCACAGGCCAAACGTTGATGGGCTAAATTTCCTT
AGTCGAGTTTCCGTCTAAATTGACGTAATTGCGACTAAGCTTTTTTGTTTTTCCTTAGCC
GAGTTTCCGTCTAAATTGATAGAACCTCGACTAAGGAAAAGCTTAGTCGAGTTTCCGTCT
AAATTGACGGAACCTCGACTAAGGAAAAGCTTAGTCGAGTTTCTGTCAAAAATGACGGAA
ATGCGGCTAACAAATTTAGCATAAGATATGGTCGGGGCTCTGAGAGGGAAGTCCAGAGTT
AACATAACCG--------------------------------------------------
------------------------------------------------------------
------------------------------------------------------------
------------------------------------------------------------
------------------------------------------------------------
---------------------------------------------------------TAA
AGGAATTGACGGAAGAG-CACACAAGGAGT------------------------------
------------------------------------------------------------
------------------------------------------------------------
------------------------------------------------------------
------------------------------------------------------------
----------------------------GGAACCTGCGGCT-------------------
------------------------------------------------------------
------------------------------------------------------------
------------------------------------------------------------
------------------------------------------------------------
------------------------------------------------------------
------------------------------------------------------------
------------------------------------------------------------
------------------------------------------------------------
------------------------------------------------------------
------------------------------------------------------------
------------------------------------------------------------
------------------------------------------------------------
------------------------------------------------------------
------------------------------------------------------------
------------------------------------------------------------
------------------------------------------------------------
------------------------------------------------------------
------------------------------------------------------------
------------------------------------------------------------
------------------------------------------------------------
------------------------------------------------------------
------------------------------------------------------------
------------------------------------------------------------
------------------------------------------------------------
------------------------------------------------------------
--------------------------------------TAATTCGACTCAACACGGGGAA
TCTTACGATGGCTCAAGGGGG-TATGATGGACGGCT-TGCGGGGTTTTCTTGAA-GTCCC
CTGGCGGTGGTGCATGGCCGT---------------------------------------
------------------------------------------------------------
------------------------------------------------------------
------------------------------------------------------------
------------------------------------------------------------
------------------------------------------------------------
------------------------------------------------------------
------------------------------------------------------------
------------------------------------------------------------
---------TCGTAGTTCGTGGA-CTATTTTGTCAGGTTAATTCCGATAACGAGCGAGA-
CACAAGATTT-CTCATTAGGG--CTTATTCTTACA----AGTCGGCTTAGTCGGGTTTTC
TTTTTTTCTTTTTTTTTCTCCCCTCTAATTTAGTCGGGTAAGTTCGCTTTTCTTGGCTGG
GTTAGTCGAGGTTGAAGGGGGAAGAGGGAGTTAGCCTTTCGACTTGTGCAG---------
------------------------------------------------------------
------------------------------------------------------------
--------------------------------AATCTGAGA-GTGATCGACGTT---GAA
AAGACGTTTG-AATTGTTGTGCAATAACAGGT----------------------------
------------------------------------------------------------
------------------------------------------------------------
------------------------------------------------------------
------------------------------------------------------------
------------------------------------------------------------
------------------------------------------------------------
------------------------------------------------------------
------------------------------------------------------------
------------------------------------------------------------
------------------------------------------------------------
------------------------------------------------------------
-----------------------CAGT-GATGCCCT------------------------
------------------------------------------------------------
------------------------------------------------------------
------------------------------------------------------------
------------------------------------------------------------
------------------------------------------------------------
------------------------------------------------------------
-------------TGGATGC--CTTCGGCGGCACGCGCGTTACAATGATTTATC--TATC
AAAATGGGCT--------------------------------------------------
-CCTGCGCCAGGAGA-GTCAAAGTC-TCGGTAAATTA--TGAAACAAACTAA--GTTGGG
ACTGTACTATGCGACAATGCAGTA----CCACGAACCAGGAATTTCTAGTAGTCATG-CG
TACCCATCGTGTGGCGGCTTTGTCCCTGCTCT----------------------------
------------------------------------------------------------
------------------------------------------------------------
------------------------------------------------------------
------------------------------------------------------------
------------------------------------------------------------
------------------------------------------------------------
------------------------------------------------------------
------------------------------------------------------------
-------------------------TTGTGCACACCGCCCGTCGCTCCTACCGATTGAGT
GGTTTGGTGAAAATGCAGGGGAGGCTTGGGGGTGGAGTTAGGTGGTTACCTAAAATTTAC
TCTGCCTGATTTACTTGCCAGGTTTCTCAGGAATAAACACAGAGACCCACTCAGCCCTAT
TCCTACAGAAATTTTTTTCTTTGGGGGAGAAGGTGGTTGCGATCGCATTAAACCAAGGA-
------------------------------------------------------------
------------------------------------------------------------
------------------------------------------------------------
------------------------------------------------------------
------------------------------------------------------------
------------------------------------------------------------
------------------------------------------------------------
------------------------------------------------------------
------------------------------------------------------------
------------------------------------------------------------
------------------------------------------------------------
------------------------------------------------------------
------------------------------------------------------------
------------------------------------------------------------
------------------------------------------------------------
------------------------------------------------------------
------------------------------------------------------------
------------------------------------------------------------
------------------------------------------------------------
------------------------------------------------------------
------------------------------------------------------------
------------------------------------------------------------
------------------------------------------------------------
------------------------------------------------------------
------------------------------------------------------------
------------------------------------------------------------
------------------------------------------------------------
------------------------------------------------------------
------------------------------------------------------------
------------------------------------------------------------
------------------------------------------------------------
------------------------------------------------------
>Dianema_inconspicuum_JX481288
-------------------------------n----------------------------
------------------------------------------------------------
------------------------------------------------------------
------------------------------------------------------------
------------------------------------------------------------
------------------------------------------------------------
------------------------------------------------------------
------------------------------------------------------------
------------------------------------------------------------
------------------------------------------------------------
------------------------------------------------------------
------------------------------------------------------------
------------------------------------------------------------
------------------------------------------------------------
------------------------------------------------------------
------------------------------------------------------------
------------------------------------------------------------
------------------------------------------------------------
------------------------------------------------------------
------------------------------------------------------------
------------------------------------------------------------
------------------------------------------------------------
------------------------------------------------------------
------------------------------------------------------------
------------------------------------------------------------
------------------------------------------------------------
------------------------------------------------------------
------------------------------------------------------------
------------------------------------------------------------
------------------------------------------------------------
------------------------------------------------------------
------------------------------------------------------------
------------------------------------------------------------
------------------------------------------------------------
------------------------------------------------------------
------------------------------------------------------------
------------------------------------------------------------
------------------------------------------------------------
------------------------------------------------------------
------------------------------------------------------------
------------------------------------------------------------
------------------------------------------------------------
------------------------------------------------------------
------------------------------------------------------------
------------------------------------------------------------
------------------------------------------------------------
------------------------------------------------------------
------------------------------------------------------------
------------------------------------------------------------
------------------------------------------------------------
------------------------------------------------------------
------------------------------------------------------------
------------------------------------------------------------
------------------------------------------------------------
------------------------------------------------------------
------------------------------------------------------------
------------------------------------------------------------
------------------------------------------------------------
------------------------------------------------------------
------------------------------------------------------------
------------------------------------------------------------
---------------------------------------------------CAATAGCAT
CTTGTTAAGTTGTTGCGGTTAAAACGCTCGTAGTCAGA-GCCGG--TGGCACGCCGTGCA
AAGCCTCGCCCTTGC---------GCGTGAGGCCCTTCTGG--TCCTGTCCGTCTC-TCC
CTCCCCGCGGGCTGATGTAAGGTTCGATGTGACCCTGTTTAAGCGGCCCCATAAAGGATG
GTCGTCAGGGGCAGTTAAGAAGGTATTAGATAAAACTGTGAGATAAGGGGAAAGG----C
GGGTTTAAACAGGCACTG------------------------------------------
------------------------------------------------------------
------------------------------------------------------------
------------------------------------------------------------
------------------------------------------------------------
---------GTTTCGCACTAATAGTAACCCTTGGGGTGGCCATGGCGTGCTGCCCATAGG
GGCGAGATCGGAACACCCCGTACCGGTTGAATCCGGTCGCGGGCTCTCTCGCCCCACATC
ACTTTGAA--TAAATTAGCGCGCTCAAAGCAGGTCTACAACATATATTGCAAGGACCT--
--------------------------TTTCC-ACGAA-TACTTC-AGCAAAGAACGAACG
AACAGGCCCACTGT----------TCTTGGTCGCAGT-----------------------
------------------------------------------------------------
-----------------------------------------AAGGGAA-TGATTAATAGG
GGAGATCGGGGCCAACCACATGGCGGGGGTAGGGGTGAAATCCGTTGATCCTCGCTAGGT
GAACTAAAGCGAAAGCAGTT-GGCAAGTACTCTTTCTTTGATCAAGAACGAAAGTCTGGG
GATCGAAGATGAT-----------------------------------------------
------------------------------------------------------------
------------------------------------------------------------
------------------------------------------------------------
------------------------------------------------------------
------------------------------------------------------------
------------------------------------------------------------
------------------------------------------------------------
------------------------------------------------------------
------------------------------------------------------------
------------------------------------------------------------
------------------------------------------------------------
------------------------------------------------------------
------------------------------------------------------------
------------------------------------------------------------
------------------------------------------------------------
------------------------------------------------------------
---CAGATACCATCGTAGTCCAGACCCTAAATGTTGTCGACCATGGATGTGACAC-AGTC
CATCC------CGACCCGCCACGCACCTTAT--------------GAGAAATCAG-AAGT
GTATGGACTCCGGGGGGAGTATGGTCGCAAGACTGAAACT--------------------
------------------------------------------------------------
------------------------------------------------------------
------------------------------------------------------------
------------------------------------------------------------
------------------------------------------------------------
------------------------------------------------------------
------------------------------------------------------------
------------------------------------------------------------
------------------------------------------------------------
------------------------------------------------------------
------------------------------------------------------------
------------------------------------------------------------
------------------------------------------------------------
---------------------------------------------------------TAA
AGGAATTGACGGAAGAG-CACACAAGGAGT------------------------------
------------------------------------------------------------
------------------------------------------------------------
------------------------------------------------------------
------------------------------------------------------------
----------------------------GGAGCCTGCGGCT-------------------
------------------------------------------------------------
------------------------------------------------------------
------------------------------------------------------------
------------------------------------------------------------
------------------------------------------------------------
------------------------------------------------------------
------------------------------------------------------------
------------------------------------------------------------
------------------------------------------------------------
------------------------------------------------------------
------------------------------------------------------------
------------------------------------------------------------
------------------------------------------------------------
------------------------------------------------------------
------------------------------------------------------------
------------------------------------------------------------
------------------------------------------------------------
------------------------------------------------------------
------------------------------------------------------------
------------------------------------------------------------
------------------------------------------------------------
------------------------------------------------------------
------------------------------------------------------------
------------------------------------------------------------
------------------------------------------------------------
--------------------------------------TAATTTGACTCAACACGGGACA
ACTCATTATGGCAAGAAAGGGACATGAGGGTCAGGCGAGCAGGCCTTATCCGA--TTCCC
TTAGTGGTGGTGCATGGTCGT---------------------------------------
------------------------------------------------------------
------------------------------------------------------------
------------------------------------------------------------
------------------------------------------------------------
------------------------------------------------------------
------------------------------------------------------------
------------------------------------------------------------
------------------------------------------------------------
---------TCTTAGTTCGTGGA-GTGATTTGTCTGGTCTATTCCGCTAACGAGCGAGAA
CCCGTTTTCCTACTGTTGGGT--CCGCC-CAGCTC----GCCCGT---TGAACGGAGGGG
TCCATGGGATCTCCGCGG-GGTAGTAATACCCAGC-GGGGAGCCCGTCAATGGGTCCCCG
AGGG--------------------------------------------------------
-------------------------------------------------ACGTGGGCTGC
AAAATAGCTGGGACGGC-------------------------------------------
--------------------------------TGTCCTTGG-GGAACCAACGCC---GTT
AAGGTGTTGT-AAGC--GGGTCAATAACAGGT----------------------------
------------------------------------------------------------
------------------------------------------------------------
------------------------------------------------------------
------------------------------------------------------------
------------------------------------------------------------
------------------------------------------------------------
------------------------------------------------------------
------------------------------------------------------------
------------------------------------------------------------
------------------------------------------------------------
------------------------------------------------------------
-----------------------CAGT-GATGCCCT------------------------
------------------------------------------------------------
------------------------------------------------------------
------------------------------------------------------------
------------------------------------------------------------
------------------------------------------------------------
------------------------------------------------------------
-------------TAGATGC--CATAGGCCGCACGCGCGCTACAATGGTGGGGT--AACC
GGGCGAA-----------------------------------------------------
-CCTGTGCC-------GTAAGGCGG-CGGGGAACCCTGGGAAAACCCTCCTC-GTCTGGG
ACCATCGGGTGTAACCACCCT-------TTGCGAACAAGGAATTTCTAGTAACCGTG-GG
TCACTAGCCCACGGTGATTTCGTCCCTGCTCT----------------------------
------------------------------------------------------------
------------------------------------------------------------
------------------------------------------------------------
------------------------------------------------------------
------------------------------------------------------------
------------------------------------------------------------
------------------------------------------------------------
------------------------------------------------------------
-------------------------TTGTACACACCGCCCGTCGCTCCTACCGATTGGAT
TGTCTGGTGAGGCTCATGGAGCTGCCCGGTTCA---------------------------
------------------------------------------------------------
------------------------------------------------------------
------------------------------------------------------------
------------------------------------------------------------
------------------------------------------------------------
------------------------------------------------------------
------------------------------------------------------------
------------------------------------------------------------
------------------------------------------------------------
------------------------------------------------------------
------------------------------------------------------------
------------------------------------------------------------
------------------------------------------------------------
------------------------------------------------------------
------------------------------------------------------------
------------------------------------------------------------
------------------------------------------------------------
------------------------------------------------------------
------------------------------------------------------------
------------------------------------------------------------
------------------------------------------------------------
------------------------------------------------------------
------------------------------------------------------------
------------------------------------------------------------
------------------------------------------------------------
------------------------------------------------------------
------------------------------------------------------------
------------------------------------------------------------
------------------------------------------------------------
------------------------------------------------------------
------------------------------------------------------------
------------------------------------------------CTTTATGGGTTG
GCCTTAGTGTGGCCTCCCTTGGGTTCTGAGGTGACGAAGTGGG--TCAAACCTCGCGGTC
TAGAGGAAGGAGAAGTCGTA
>Dianema_nivale_JX481289
-------------------------------n---------CCGAAGATT-AAGCCATGC
ATGTGTCC--GATTTT---TAGTAGAACGA------------------------------
--------------------------TTAAATCTGCGAAGGGCTCCGTACATCTGTTGCA
A-CCTAACTCAATCCTGGCTGCTCCGGGTAGCGGC-------------------------
------------------------------------------------------------
------------------------------------------------------------
------------------------------------------------------CGC-CA
GG-ATAAC-CTGGGTAATTCTC-AGGCTAATACATAT-ATAAGAGCTGCAAGATTACAAA
GAAAA-ACACATAGGGGGACCCGCTAAGGTGACCGCACGCAAATCCGGTTACCCTGTAGA
AGGGCTGGCAACATTGCTCCTCCATCGCTGCAGAGGTCGCAGGACCC-------------
------------------------------------------------------------
------------------------------------------------------------
------------------------------------------------------------
------------------------------------------------------------
GTG---AC-CTGG-GAGGTCTTCGCGCGGTGGGCGTTCCGCTTGTTCTTTCAAGCCCGTC
CATCGGGGGATCTATCGGTGAAAAGTACTGCGTGCCCCTTACCGTTGTTAAAGTGCCCTT
TCG----------------------GTGCTA--CGGT---TTTTCATATGTGCTTCAGCT
CTATCA-ACT-CCAAACTTAGGGAGTGGCTCCC-ATTGGTTGCAACGGATACAGAGGATC
AGGGTTCGATTCTGGAGAGGTAGCCTTAAAAATCGCTACTACTTCTAAGGAAGGCAGCAG
GCGCGCAACGTTCCCAATGGGG---------ATAC---------CCTGAGGACGTGAGGG
GACATAGCAATACTGGGCCT--TTAAA----CGTTCGGTAATTGA-AATGGGGGAGATCT
AAATC-GCCCACCG-------AGTAACAATTGGAGGACAAGTCTGGTTAACTTCAGCCAG
ATGTCGGGTAAGAAGCGCAAGGCTGACACGGAGGAGCGGGAGCATAATAAATGCTCTTGC
GAAACTAGTTGGTCTTTTTTTTGTTCGGCAGAAAGTGGGGATCAGCTCCTACTGTACAGT
TGTAAAATGCAGGGAACACTAGGTACGGGGGTGGATACGACTGCAACGGGAAATTAACCG
GAAGCAGCCGGGGTCCGATGATCCTGGGCGTGATAATGCCACCCTCAGGGGCCTGTCCGG
CCACGCCTCTCCCTAGTTGGGGGAGGCACCACCCTAGCCAATCTGCAGCCAAGCCGCTAT
ACCCTTTTCCTGGCTGCTACTCTTGCTTTGTGCCGGGGCCAGCTAAGGTCATGAGGGAGC
GCGGAAGGTTCAGAGACTATAATCGACTGGGCGCAAGCTTAAAGAATAGTCCACTCCCCC
CAGTGATGGGGCCAGCAAAAGTAGGGGGGGCGCTGTCCCCCTGAGGCATGCTGGGTCCTT
TGAGTACAGGTTCATTCAAAATCCCTGTGCGAGGATGGTTGAAGG---------------
------------------------------------------------------------
------------------------------------------------------------
------------------------------------------------------------
------------------------------------------------------------
------------------------------------------------------------
------------------------------------------------------------
------------------------------------------------------------
------------------------------------------------------------
------------------------------------------------------------
--------------------------------------------------------GCCA
GCACCCGCG---------------------------------------------------
------------------------------------------------------------
------------------------------------------------------------
------------------------------------------------------------
------------------------------------------------------------
------------------------------------------------------------
------------------------------------------------------------
------------------------------------------------------------
------------------------------------------------------------
------------------------------------------------------------
------------------------------------------------------------
------------------------------------------------------------
------------------------------------------------------------
------------------------------------------------------------
------------------------------------------------------------
------------------------------------------------------------
------------------------------------------------------------
------------------------------------------------------------
------------------------------------------------------------
------------------------------------------------------------
--------------------------------------GTAATTCCAGCTCCAATAGCAT
CTTGTTAAGCTGTTGCGGTTAAAACGCTCGTAGTCCGA-TTAGG--TGGCGTGTTGTGCA
ACGCTTCGCCCTTG----------GTGTGAGGCCCTTCGAGAGTTCTGCCGACTCGGTTC
TCTCCCACGTCCGGTAGGTTCAATGTTTAACAAGACCCGGTCC--TCGGCCCGAGAAGGG
AAGCGGGGATCGGTATTGGACAGAATAAGAAGCCGGGTAAACGTGGGTTGTGGCGCTGGG
GAGGATCAAACAGGCTCC------------------------------------------
------------------------------------------------------------
------------------------------------------------------------
------------------------------------------------------------
------------------------------------------------------------
--------GTTTCGCACTAATAGTAACCCTTGGGTGGGGCCATGGCGCGCTGCCCATAGG
GGCGGGATTGGAACACCCTGTACCGATTGAGTTTGGTCGCAGGCTCTCCCGCTCCGCATC
ACTTTGAA--TAAATTAGCGCGCTTAAAGCAGGTCTACAACATATATTGCAAGGACC---
--------------------------TAAAC-AAGAA-TACTAC-AGCAAAGAACGAACG
AACAGGCCCACTGT----------TCACGGTCACAGT-----------------------
------------------------------------------------------------
-----------------------------------------ACGGGAA-TGATTAATAGG
GGAGATCGGGGCCAACCACATGGCTGGGGTAGGGGTGAAATCCGTTGATCCTAGCTAGGT
GAACTAAAGCGAAAGCAGTT-GGCAAGTACTCTTTCTTTGATCAAGAACGAAAGTCTGGG
GATCGAAGATGAT-----------------------------------------------
------------------------------------------------------------
------------------------------------------------------------
------------------------------------------------------------
------------------------------------------------------------
------------------------------------------------------------
------------------------------------------------------------
------------------------------------------------------------
------------------------------------------------------------
------------------------------------------------------------
------------------------------------------------------------
------------------------------------------------------------
------------------------------------------------------------
------------------------------------------------------------
------------------------------------------------------------
------------------------------------------------------------
------------------------------------------------------------
---CAGATACCATCGTAGTCCAGACCCTAAATGTTGCCAACCATGGATGTGACAC-AGTC
CATCC------CGACCCGCCACGCACCTTAT--------------GAGAAATCAG-AAGT
GTATGGGCTCCGGGGGGAGTATGGTCGCAAGACTGAAACT--------------------
------------------------------------------------------------
------------------------------------------------------------
------------------------------------------------------------
------------------------------------------------------------
------------------------------------------------------------
------------------------------------------------------------
------------------------------------------------------------
------------------------------------------------------------
------------------------------------------------------------
------------------------------------------------------------
------------------------------------------------------------
------------------------------------------------------------
------------------------------------------------------------
---------------------------------------------------------TAA
AGGAATTGACGGAAGAG-CACACAAGGAGT------------------------------
------------------------------------------------------------
------------------------------------------------------------
------------------------------------------------------------
------------------------------------------------------------
----------------------------GGAGCCTGCGGCT-------------------
------------------------------------------------------------
------------------------------------------------------------
------------------------------------------------------------
------------------------------------------------------------
------------------------------------------------------------
------------------------------------------------------------
------------------------------------------------------------
------------------------------------------------------------
------------------------------------------------------------
------------------------------------------------------------
------------------------------------------------------------
------------------------------------------------------------
------------------------------------------------------------
------------------------------------------------------------
------------------------------------------------------------
------------------------------------------------------------
------------------------------------------------------------
------------------------------------------------------------
------------------------------------------------------------
------------------------------------------------------------
------------------------------------------------------------
------------------------------------------------------------
------------------------------------------------------------
------------------------------------------------------------
------------------------------------------------------------
--------------------------------------TAATTTGACTCAACACGGGACA
ACTCATTAGGGCAAGAAAGGGAAATGAGGGCCAGGCGAGCAGGCCTTGCCCGA--TTCTC
TTAGTGGTGGTGCATGGTCGT---------------------------------------
------------------------------------------------------------
------------------------------------------------------------
------------------------------------------------------------
------------------------------------------------------------
------------------------------------------------------------
------------------------------------------------------------
------------------------------------------------------------
------------------------------------------------------------
---------TCTTAGTTCGTGGA-GTGATTTGTCTGGTCTATTCCGCTAACGAGCGAGAA
CCCGTTTTTCTACTGTTGGGA--CCGCC-CAGCTC----GCCTGT---TGAACGGAGGGG
TCCATGGGAGCTCTGGGGTGGTAGCAATACCGCTTTGGGGAGCCCGTCAATGGATCCCCG
AGGG--------------------------------------------------------
-------------------------------------------------ACGTGGGCTGC
GAAATAGCTGGGATGGC-------------------------------------------
--------------------------------TGTCCTTGG-AGAACCAACGCC---GTG
AAGGTGTTGT-AAGC--GGGTCAATAACAGGT----------------------------
------------------------------------------------------------
------------------------------------------------------------
------------------------------------------------------------
------------------------------------------------------------
------------------------------------------------------------
------------------------------------------------------------
------------------------------------------------------------
------------------------------------------------------------
------------------------------------------------------------
------------------------------------------------------------
------------------------------------------------------------
-----------------------CAGT-GATGCCCT------------------------
------------------------------------------------------------
------------------------------------------------------------
------------------------------------------------------------
------------------------------------------------------------
------------------------------------------------------------
------------------------------------------------------------
-------------TAGATGC--CTTAGGCTGCACGCGCGCTACAATGGTGGGGT--AACC
GGGCGAA-----------------------------------------------------
-CCTGTGCT-------GAAAGGCGG-CGGGGAACCCTGGGAAAACCCTCCTC-GTCTGGG
ACCATCGGGTGTAACCACCCT-------TTACGAACAAGGAATTTCTAGTAACCGTG-GG
TCACTAGCCCACGGTGATTTCGTCCCTGCTCT----------------------------
------------------------------------------------------------
------------------------------------------------------------
------------------------------------------------------------
------------------------------------------------------------
------------------------------------------------------------
------------------------------------------------------------
------------------------------------------------------------
------------------------------------------------------------
-------------------------TTGTACACACCGCCCGTCGCTCCTACCGATTGGAT
TGCCTGGTGAGGCCCATGGAGTCGCCCGGTTCA---------------------------
------------------------------------------------------------
------------------------------------------------------------
------------------------------------------------------------
------------------------------------------------------------
------------------------------------------------------------
------------------------------------------------------------
------------------------------------------------------------
------------------------------------------------------------
------------------------------------------------------------
------------------------------------------------------------
------------------------------------------------------------
------------------------------------------------------------
------------------------------------------------------------
------------------------------------------------------------
------------------------------------------------------------
------------------------------------------------------------
------------------------------------------------------------
------------------------------------------------------------
------------------------------------------------------------
------------------------------------------------------------
------------------------------------------------------------
------------------------------------------------------------
------------------------------------------------------------
------------------------------------------------------------
------------------------------------------------------------
------------------------------------------------------------
------------------------------------------------------------
------------------------------------------------------------
------------------------------------------------------------
------------------------------------------------------------
------------------------------------------------------------
------------------------------------------------CTTTATGGGTTG
GTCCGAGTCTGGCCTCCCTTGGGTTCTGTGGTGGCGAAGTGGG--TCAAACCTCGCGGTC
TAGAGGAAGGA
>Dictydiaethalium_dictyosporum_JX481290
-------------------------------n----------------------------
------------------------------------------------------------
-----------------------------------CGAACGGCTCCGTATATCTATTGTA
A-CCCACCGCCACCAATCA-----------------------------------------
------------------------------------------------------------
------------------------------------------------------------
------------------------------------------------------CCA-CC
GG-ATAAC-CCAGGTAATTCTT-GGGCTAATACGTGC-A-ATCCCATCCGGGCTTCGGCC
TGGGTCTCGCGGAACCAAACCAACGGCCCCCCTAAA-AAAG-------------------
------------------------------------------------------------
------------------------------------------------------------
------------------------------------------------------------
------------------------------------------------------------
-------------------------------GGGCTGCTCGTGAGGGACTGTGAGGGCGC
CTT---AC-CGGC-CCTT------------------------------------------
------------------------------------------------------------
-------------------------CGGGGA--CGGT---ATGGGCGATGGACTTTAGAC
CTATCA-ACT-AGACGGCAGGTGCAAGCCCCGC-CATGGTGACAACGGGTACAGAGGATC
AGGGTTCGGTCCTGGAGAGGTAGCCTTAGAGATCGCTACCACTTCTAAGGAAGGCAGCAG
GCGCGCAACGTTCCCAATGGGG---------ATTC---------CCTGAGGACGTGACGG
GACATATCAATACCGGGCTG--ATAA-----AGCCCGGTAATTGA-AATGGGGGCGATTT
AAATC-CCCCACCG-------AGTAACAATTGGAGGACAAGTCTGGT-------------
------------------------------------------------------------
------------------------------------------------------------
------------------------------------------------------------
------------------------------------------------------------
------------------------------------------------------------
------------------------------------------------------------
------------------------------------------------------------
------------------------------------------------------------
------------------------------------------------------------
------------------------------------------------------------
------------------------------------------------------------
------------------------------------------------------------
------------------------------------------------------------
------------------------------------------------------------
------------------------------------------------------------
------------------------------------------------------------
------------------------------------------------------------
------------------------------------------------------------
--------------------------------------------------------GCCA
GCACCCGCG---------------------------------------------------
------------------------------------------------------------
------------------------------------------------------------
------------------------------------------------------------
------------------------------------------------------------
------------------------------------------------------------
------------------------------------------------------------
------------------------------------------------------------
------------------------------------------------------------
------------------------------------------------------------
------------------------------------------------------------
------------------------------------------------------------
------------------------------------------------------------
------------------------------------------------------------
------------------------------------------------------------
------------------------------------------------------------
------------------------------------------------------------
------------------------------------------------------------
------------------------------------------------------------
------------------------------------------------------------
--------------------------------------GTAATTCCAGCTCCAATAGCAT
CTAATTAAGTTGTTGCAGTTAAAACGCTCGTAGTCGAA-GGGGG--CGCGCTTTGCTTCG
G-----------------------CAGTACAGCCGTCCGTGCGGGTCCCGCCCCTAAAAA
GGCGGGCC--GGCGGGCTGGTAGGAACCCGCGGTGGGGCCGCCTCCTTGCCCTTGGGGGA
AGGTGGGCTTTCATTAGCCCGCCATTGCCC------------------------------
------------------------------------------------------------
------------------------------------------------------------
------------------------------------------------------------
------------------------------------------------------------
------------------------------------------------------------
------------------------------------------------------------
-----------------------------------------------CCTTGGGCCCTTT
ACTTTGAA--TAAATTCGAGCGCTCAACGCAGGCCTGC------GGGCCTACTCATC---
--------------------------------CTGAA-GACTCC-AGCAAAGAATAATGG
AACAAGATACCCTCTTGGTC----CGTTGGTACCATTC----------------------
------------------------------------------------------------
-----------------------------------------GGGATAA-TGATCAACAGG
GGCGATCGGGGTCGGCCACATGGCGGGGGTAGGGGTGAAATCCGTTGATCCTCGCCAGGT
GACCAAGAGCGAAAGCAGCC-GACAAGTACGCCTTCTTTGATCAAGAACGAAAGTCTGGG
GATCGAAGACGAT-----------------------------------------------
------------------------------------------------------------
------------------------------------------------------------
------------------------------------------------------------
------------------------------------------------------------
------------------------------------------------------------
------------------------------------------------------------
------------------------------------------------------------
------------------------------------------------------------
------------------------------------------------------------
------------------------------------------------------------
------------------------------------------------------------
------------------------------------------------------------
------------------------------------------------------------
------------------------------------------------------------
------------------------------------------------------------
------------------------------------------------------------
---TAGATACCGTCGTAGTCCAGACCCTAAATGCTGCCGGCCATGGATGGGCGAA-AGTC
CATCC------CGACCCTGCCCGCACCTTGT--------------GGGAAACCAC-AAGC
GTTTGGGCTCCGGGGGGAGTATGGTCGCAAGGCTGAAACT--------------------
------------------------------------------------------------
------------------------------------------------------------
------------------------------------------------------------
------------------------------------------------------------
------------------------------------------------------------
------------------------------------------------------------
------------------------------------------------------------
------------------------------------------------------------
------------------------------------------------------------
------------------------------------------------------------
------------------------------------------------------------
------------------------------------------------------------
------------------------------------------------------------
---------------------------------------------------------TAA
AGGAATTGACGGAAGAG-CACACAAGGAGT------------------------------
------------------------------------------------------------
------------------------------------------------------------
------------------------------------------------------------
------------------------------------------------------------
----------------------------GGAGCCTGCGGCT-------------------
------------------------------------------------------------
------------------------------------------------------------
------------------------------------------------------------
------------------------------------------------------------
------------------------------------------------------------
------------------------------------------------------------
------------------------------------------------------------
------------------------------------------------------------
------------------------------------------------------------
------------------------------------------------------------
------------------------------------------------------------
------------------------------------------------------------
------------------------------------------------------------
------------------------------------------------------------
------------------------------------------------------------
------------------------------------------------------------
------------------------------------------------------------
------------------------------------------------------------
------------------------------------------------------------
------------------------------------------------------------
------------------------------------------------------------
------------------------------------------------------------
------------------------------------------------------------
------------------------------------------------------------
------------------------------------------------------------
--------------------------------------TAATTTGACTCAACACGGGAAA
ACTCACTAGGGCAAGAAAGCGGTACGATGGACAGCCTATCAGGTCTTTCCTGA--TTCGC
TTAGTGGTGGTGCATGGTCGT---------------------------------------
------------------------------------------------------------
------------------------------------------------------------
------------------------------------------------------------
------------------------------------------------------------
------------------------------------------------------------
------------------------------------------------------------
------------------------------------------------------------
------------------------------------------------------------
---------TCTTAGTTCGTGGA-GTGATTTGTCTGGTCAATTCCGCTAACGAGCGAGAA
CCCAACGTTGCCTAGTTGGGC--CCTT--GCGCAT----GCCGCC---GTGATGCCGGTG
GGCCTTGGGGGGCGGCCTTCGGGCAGCCTCCTGGGCTCCTGGTTGA--------------
------------------------------------------------------------
-------------------------------------------------CCGGTGGCTGA
AAACGCGCTTGGTGC---------------------------------------------
--------------------------------CGGCCTGGC-TGGACTGGCTCC---GTT
AAGGGGCCGG-AAGT--GGGTCAATAACAGGT----------------------------
------------------------------------------------------------
------------------------------------------------------------
------------------------------------------------------------
------------------------------------------------------------
------------------------------------------------------------
------------------------------------------------------------
------------------------------------------------------------
------------------------------------------------------------
------------------------------------------------------------
------------------------------------------------------------
------------------------------------------------------------
-----------------------CAGT-GATGCCCT------------------------
------------------------------------------------------------
------------------------------------------------------------
------------------------------------------------------------
------------------------------------------------------------
------------------------------------------------------------
------------------------------------------------------------
-------------TAGATGC--TCTAGGCTGCACGCGCGCTACAATGGGCGGAA--CAAC
GGGTCT------------------------------------------------------
-CCTGTGCC-------TAACGGTAA-CGGGTAATCCTC-TAAAACCCCCCAT-GTCTGGG
ATCGAGGCGTGTAACGCGCC--------TCGTCAACAAGGAATTTCTAGTAGTTACG-GG
TCACCAGCCCGTGACGATTCTGTCCCTGCTCT----------------------------
------------------------------------------------------------
------------------------------------------------------------
------------------------------------------------------------
------------------------------------------------------------
------------------------------------------------------------
------------------------------------------------------------
------------------------------------------------------------
------------------------------------------------------------
-------------------------TTGTACACACCGCCCGTCGCTCCTACCGATTGGAC
TGAAGGGTGAGCAGCCTGGACCGCCTCGGGAGG---------------------------
------------------------------------------------------------
------------------------------------------------------------
------------------------------------------------------------
------------------------------------------------------------
------------------------------------------------------------
------------------------------------------------------------
------------------------------------------------------------
------------------------------------------------------------
------------------------------------------------------------
------------------------------------------------------------
------------------------------------------------------------
------------------------------------------------------------
------------------------------------------------------------
------------------------------------------------------------
------------------------------------------------------------
------------------------------------------------------------
------------------------------------------------------------
------------------------------------------------------------
------------------------------------------------------------
------------------------------------------------------------
------------------------------------------------------------
------------------------------------------------------------
------------------------------------------------------------
------------------------------------------------------------
------------------------------------------------------------
------------------------------------------------------------
------------------------------------------------------------
------------------------------------------------------------
------------------------------------------------------------
------------------------------------------------------------
------------------------------------------------------------
------------------------------------------------------------
-----------GTGTAACAACCAGCCCGCCGGTGGGAAGGGCC--GCAAACCTCTCGGTC
TAGAGGAAGGAGAAGTCGTAACAAGGTATCCGTA
>Dictydiaethalium_plumbeum_JX481291
-------------------------------n----------------------------
------------------------------------------------------------
------------------------------------------------------------
-------------------TCC--------------------------------------
------------------------------------------------------------
------------------------------------------------------------
------------------------------------------------------GGT-GC
GG-ATAAC-CCAGGTAATTCTT-GGGCTAATACGTGG-TCAAACCATTCGGGCTTCGGCC
TGGGTCTCACGGAACCAAACCAACGGCCCCTCCTCACGGGG-------------------
------------------------------------------------------------
------------------------------------------------------------
------------------------------------------------------------
------------------------------------------------------------
-------------------------------GGGCGACTCGCGAGGGACTGTGAGGGCGC
CTA---AC-CGGC-CTT-------------------------------------------
------------------------------------------------------------
--------------------------CTGGC--CGGT---GTGTGCGATGGACTTTAGAC
CTATCA-ACT-AGACGGCAGGGGCAAGCCCCGC-CGTGGTTACAACGGGTACAGAGGATC
AGGGTTCGGTCCTGGAGAGGTAGCCTTAAAGATCGCTCCCACTTCTAAGGAAGGCAGCAG
GCGCGCAACGTTCCCAATGGGG---------ATTC---------CCTGAGGACGTGACGG
GACATAGCAATACTGGGCCC--ATAA-----AGCCTGGTAATTGA-AATGGGGGCGATTT
AAATC-ACCCACCG-------AGTAGCAATTGGAGGACAAGTCTGGT-------------
------------------------------------------------------------
------------------------------------------------------------
------------------------------------------------------------
------------------------------------------------------------
------------------------------------------------------------
------------------------------------------------------------
------------------------------------------------------------
------------------------------------------------------------
------------------------------------------------------------
------------------------------------------------------------
------------------------------------------------------------
------------------------------------------------------------
------------------------------------------------------------
------------------------------------------------------------
------------------------------------------------------------
------------------------------------------------------------
------------------------------------------------------------
------------------------------------------------------------
--------------------------------------------------------GCCA
GCACCCGCG---------------------------------------------------
------------------------------------------------------------
------------------------------------------------------------
------------------------------------------------------------
------------------------------------------------------------
------------------------------------------------------------
------------------------------------------------------------
------------------------------------------------------------
------------------------------------------------------------
------------------------------------------------------------
------------------------------------------------------------
------------------------------------------------------------
------------------------------------------------------------
------------------------------------------------------------
------------------------------------------------------------
------------------------------------------------------------
------------------------------------------------------------
------------------------------------------------------------
------------------------------------------------------------
------------------------------------------------------------
--------------------------------------GTAATTCCAGCTCCAATAGCAT
CTAATTAAGTTGTTGCAGTTAAAACGCTCGTAGTCGAA-GTTGG--CGCGCCCTGCTGCG
C-----------------------CAGTACAGCCTGCCGTCCGGG--CCGCCCCTAAAAA
GGCGTGTCTTGGCGGTGCGGCCGGAAAGCGCGGTGTGGCCGCCTCCTTGCCCTTGGGTGA
AGGCGGGCTTTCATTAGCCTGCCACTGCTC------------------------------
------------------------------------------------------------
------------------------------------------------------------
------------------------------------------------------------
------------------------------------------------------------
------------------------------------------------------------
------------------------------------------------------------
-----------------------------------------------CCTTGGGCCTTTT
ACTTTGAA--TAAATTCGAGCGCTCAACGCAGGCCTCC------GGGCCTTATTACA---
--------------------------------CTGAA-GACTCC-AGCAAAGAATAATGG
AACAAGAGCCTCTCTTGGAC----CGTTGGTACCGCGG----------------------
------------------------------------------------------------
-----------------------------------------GAGATAA-TGATCAATAGG
GGCGATCGGGGTCAGCCACATGGCAGGGGTAGGGGTGAAATCCGTTGATCCTTGCCAGGT
GAACAAGAGCGAAAGCAGCT-GACAAGTACGCTTTCTTTGATCAAGAACGAAAGTCTGGG
GATCGAAGATGAT-----------------------------------------------
------------------------------------------------------------
------------------------------------------------------------
------------------------------------------------------------
------------------------------------------------------------
------------------------------------------------------------
------------------------------------------------------------
------------------------------------------------------------
------------------------------------------------------------
------------------------------------------------------------
------------------------------------------------------------
------------------------------------------------------------
------------------------------------------------------------
------------------------------------------------------------
------------------------------------------------------------
------------------------------------------------------------
------------------------------------------------------------
---TAGATACCGTCGTAGTCCAGACCCTAAATGCTGCCGGCCATGGATGGGCAAC-AGTC
CATCC------CGACCCAGCCTGCACCTTGT--------------GGGAAACCAT-AAGC
GTTTGGGCTCCGGGGGGAGTATGGTCGCAAGACTGAAACT--------------------
------------------------------------------------------------
------------------------------------------------------------
------------------------------------------------------------
------------------------------------------------------------
------------------------------------------------------------
------------------------------------------------------------
------------------------------------------------------------
------------------------------------------------------------
------------------------------------------------------------
------------------------------------------------------------
------------------------------------------------------------
------------------------------------------------------------
------------------------------------------------------------
---------------------------------------------------------TAA
AGGAATTGACGGAAGAG-CACACAAGGAGT------------------------------
------------------------------------------------------------
------------------------------------------------------------
------------------------------------------------------------
------------------------------------------------------------
----------------------------GGAGCCTGCGGCT-------------------
------------------------------------------------------------
------------------------------------------------------------
------------------------------------------------------------
------------------------------------------------------------
------------------------------------------------------------
------------------------------------------------------------
------------------------------------------------------------
------------------------------------------------------------
------------------------------------------------------------
------------------------------------------------------------
------------------------------------------------------------
------------------------------------------------------------
------------------------------------------------------------
------------------------------------------------------------
------------------------------------------------------------
------------------------------------------------------------
------------------------------------------------------------
------------------------------------------------------------
------------------------------------------------------------
------------------------------------------------------------
------------------------------------------------------------
------------------------------------------------------------
------------------------------------------------------------
------------------------------------------------------------
------------------------------------------------------------
--------------------------------------TAATTTGACTCAACACGGGAAA
ACTCACTAGGGCAAGAAAGCAGTACGATGGTCAGTCTATCAGGTCTTACCTGA--TTCGT
TTAGTGGTGGTGCATGGTCGT---------------------------------------
------------------------------------------------------------
------------------------------------------------------------
------------------------------------------------------------
------------------------------------------------------------
------------------------------------------------------------
------------------------------------------------------------
------------------------------------------------------------
------------------------------------------------------------
---------TCTTAGTTCGTGGA-GTGATTTGTCTGGTCAATTCCGCTAACGAGCGAGAA
CCCCTCTTCGTCTAGTTGTGC--CCTT--GCGCAT----GCTGCC---TTGATTTGGGCC
GGTCGGGGTGTGCGCCTCCGGGTGTGTGCCCTGGCTGCTTGAT-GA--------------
------------------------------------------------------------
-------------------------------------------------TGGATGGCTGA
AAACGCGCCTGGCGC---------------------------------------------
--------------------------------CGGCCTGGC-GGGACTGGCTCC---GAC
AAGGGGCCGG-AAGT--GGGTCAATAACAGGT----------------------------
------------------------------------------------------------
------------------------------------------------------------
------------------------------------------------------------
------------------------------------------------------------
------------------------------------------------------------
------------------------------------------------------------
------------------------------------------------------------
------------------------------------------------------------
------------------------------------------------------------
------------------------------------------------------------
------------------------------------------------------------
-----------------------CAGT-GATGCCCT------------------------
------------------------------------------------------------
------------------------------------------------------------
------------------------------------------------------------
------------------------------------------------------------
------------------------------------------------------------
------------------------------------------------------------
-------------TAGATGC--TCTAGGCTGCACGCGCGCTACAATGGGTGGAG--CACC
GGGTGT------------------------------------------------------
-CCTGTGCC-------TAATGGCAA-CGGGTAATCCTC-AAAAGCCCCCCAT-GTCTGGG
ATCGAGGCGTGTAACGCGCC--------TCGTCAACAAGGAATTTCTAGTAGTCATG-GG
TCACTAGCCCGTGACGATTCTGTCCCTGCTCT----------------------------
------------------------------------------------------------
------------------------------------------------------------
------------------------------------------------------------
------------------------------------------------------------
------------------------------------------------------------
------------------------------------------------------------
------------------------------------------------------------
------------------------------------------------------------
-------------------------TTGTACACACCGCCCGTCGCTCCTACCGATTGGAC
TGGGTGGTGAGTAGCCTGGACAGCCTGCGGCGG---------------------------
------------------------------------------------------------
------------------------------------------------------------
------------------------------------------------------------
------------------------------------------------------------
------------------------------------------------------------
------------------------------------------------------------
------------------------------------------------------------
------------------------------------------------------------
------------------------------------------------------------
------------------------------------------------------------
------------------------------------------------------------
------------------------------------------------------------
------------------------------------------------------------
------------------------------------------------------------
------------------------------------------------------------
------------------------------------------------------------
------------------------------------------------------------
------------------------------------------------------------
------------------------------------------------------------
------------------------------------------------------------
------------------------------------------------------------
------------------------------------------------------------
------------------------------------------------------------
------------------------------------------------------------
------------------------------------------------------------
------------------------------------------------------------
------------------------------------------------------------
------------------------------------------------------------
------------------------------------------------------------
------------------------------------------------------------
------------------------------------------------------------
------------------------------------------------------------
---------TTCTCAAAGGCTGCTGCTTCGTGCCGGAAGGGCC--GCGAACCTCTCGGTC
TAGAGGAAGGAGAAGTCGTAACAAGGTATCCG
>Dictydiaethalium_plumbeum_JX481292
-------------------------------n----------------------------
------------------------------------------------------------
---------------------------------------------CGTATATCTATTGTA
A-CCTACCGCCACCGATCAAAC--------------------------------------
------------------------------------------------------------
------------------------------------------------------------
------------------------------------------------------AAG-GC
GG-ATAAC-CCAGGTAATTCTT-GGGCTAATACGTGG-T-AA--CATTTGGGCTTCGGCC
CAGGTCTCACGGATCCAAACCAACGGCCCCCTT----AAAA-------------------
------------------------------------------------------------
------------------------------------------------------------
------------------------------------------------------------
------------------------------------------------------------
-------------------------------GGGCGACTCGTGAGGGACTGTGAGGGCGC
CTA---AC-CGAC-CCGC------------------------------------------
------------------------------------------------------------
-------------------------AAGGGA--CGGT---GTGTGCGATGGACTTTAGAC
CTATCA-ACT-AGACGGCAGGGGCACGCCCCGC-CGTGGTTACAACGGGTACAGAGGATC
AGGGTTCGGTTCTGGAGAGGTAGCCTTAGAGATCGCTACCACTTCTAAGGAAGGCAGCAG
GCGCGCAACGTTCCCAATGGGG---------ATTC---------CCTGAGGACGTGACGG
GACATATCAATACTGGGCCC--ATAA-----AGCCCGGTAATTGA-AATGGGGGCGATTT
AAATC-CCCCACCG-------AGTAACAATTGGAGGACAAGTCTGGT-------------
------------------------------------------------------------
------------------------------------------------------------
------------------------------------------------------------
------------------------------------------------------------
------------------------------------------------------------
------------------------------------------------------------
------------------------------------------------------------
------------------------------------------------------------
------------------------------------------------------------
------------------------------------------------------------
------------------------------------------------------------
------------------------------------------------------------
------------------------------------------------------------
------------------------------------------------------------
------------------------------------------------------------
------------------------------------------------------------
------------------------------------------------------------
------------------------------------------------------------
--------------------------------------------------------GCCA
GCACCCGCG---------------------------------------------------
------------------------------------------------------------
------------------------------------------------------------
------------------------------------------------------------
------------------------------------------------------------
------------------------------------------------------------
------------------------------------------------------------
------------------------------------------------------------
------------------------------------------------------------
------------------------------------------------------------
------------------------------------------------------------
------------------------------------------------------------
------------------------------------------------------------
------------------------------------------------------------
------------------------------------------------------------
------------------------------------------------------------
------------------------------------------------------------
------------------------------------------------------------
------------------------------------------------------------
------------------------------------------------------------
--------------------------------------GTAATTCCAGCTCCAATAGCAT
CTAATTAAGTTGTTGCAGTTAAAACGCTCGTAGTCTAA-GCAGG--CGCGCCTTGCTGTG
C-----------------------CAGTACAACTCCCCGTCTGGG--CCGCCCCTCAAAA
GGCGCGCCT-GGTGGCGGCGTGGGACCGCATGGTGGGGCCGCCTCCTTGCCCTTGGGAGA
AGGCGGGCTTTCATTAGCCTGCCACCGCTT------------------------------
------------------------------------------------------------
------------------------------------------------------------
------------------------------------------------------------
------------------------------------------------------------
------------------------------------------------------------
------------------------------------------------------------
-----------------------------------------------CCTTGGGCCCTTC
ACTTTGAA--TAAATTCGAGCGCTCAACGCAGGCCTAC------GGGCCTATCTC-----
--------------------------------CTGCA-GACTCC-AGCAAAGAATGATGG
AACAAGATAACCTCTTGGTC----CGTTGGTGCCAAAT----------------------
------------------------------------------------------------
-----------------------------------------GGTATAA-TGATTTATTGG
GGCGATCGGGGTCGGCCACATGGCAGGGGTAGGGGTGAAATCCGTTGATCCTTGCCAGGT
GATCAAGAGCGAAAGCAGCC-GACAAGTACGCTTTCTTAGATCAAGAACGAAAGTCTGGG
GATCGAAGACGAT-----------------------------------------------
------------------------------------------------------------
------------------------------------------------------------
------------------------------------------------------------
------------------------------------------------------------
------------------------------------------------------------
------------------------------------------------------------
------------------------------------------------------------
------------------------------------------------------------
------------------------------------------------------------
------------------------------------------------------------
------------------------------------------------------------
------------------------------------------------------------
------------------------------------------------------------
------------------------------------------------------------
------------------------------------------------------------
------------------------------------------------------------
---TAGATACCGTCGTAGTCCAGACCCTAAATGCTGCCGGCCATGGATGGGCAAC-AGTC
CATCC------CGACCCTGCCTGCACCTTGT--------------GGGAAACCAT-AAGC
GTCTGGGCTCCGGGGGGAGTATGGTCGCAAGGCTGAAACT--------------------
------------------------------------------------------------
------------------------------------------------------------
------------------------------------------------------------
------------------------------------------------------------
------------------------------------------------------------
------------------------------------------------------------
------------------------------------------------------------
------------------------------------------------------------
------------------------------------------------------------
------------------------------------------------------------
------------------------------------------------------------
------------------------------------------------------------
------------------------------------------------------------
---------------------------------------------------------TAA
AGGAATTGACGGAAGAG-CACACAAGGAGT------------------------------
------------------------------------------------------------
------------------------------------------------------------
------------------------------------------------------------
------------------------------------------------------------
----------------------------GGAGCCTGCGGCTTAAATGCTAGGTCGCGATA
GTCGGGTGTCACACACTTGTTAGGGGGGTGATGGTGTATCTGGGAGGTGACAATTACATT
CGAGCCGACCAGACCAATAAGCATGACGCGCAACCTTGTGGTTGGGTTGAAGAGCCTGTT
AGATGCCTTGATCTCTGGCACAGTGTGGAGGTTCCACCAGGGGGAGGCCTATGGTCCGCA
CTACAACTCTGCAGATGCATATGACATACTGCGGGAAAAACTGTTTAGGCAGCGTGCGGC
GGCCACGTTGGATCCCCTTACCTACGCTTATTTGGTTCACCAGTGCATCAACACCCCCTT
AGCTGCCTGCGAAACTGCCATGGAAGTGTTGTCTCAGAGACATGGTCTGTGCTATAAACT
TGCAACACGGAGTCATCCGCAACTCCGCTTTCTCAACAAACTCAGCAGCAATGCTGATGG
ACGTTCAGTGGTGCCGCTTAGTACGGTTTGTAGGCTGTTCAACGCGATAGGGCAGGGACA
CCATCAAGTGGGTACTGCTGGTGATGCGGCAAAAGCGCTGATTGATGAAATAGCGCAAGA
GATTGACCGCGTTATGCCTTTGAACTCGAACGGTGAGCCCACACGCTGGATAGAGGTGCA
CACATGCAAAGAGTTATCCTGTTGCCAGTATGGACACACAGTACCGCTCACAGACTTCCA
AAACAAGCTGAATGATGCGTGTACTGCCTATTGGGTTATCAACGGGGAAATGATCAACAT
GTGCCAGTGTACGGATGTCATATCTAAGAAATGCATTAGACCAGGTCCGAGGGCTAACAG
TGAAATGGTAAGGAGGATACTCGAAGCCATTCTAGAGAGCACGCACTAGAGGTTGCGGCT
GCACGGATGTAATTATGTAAATAAACGCTGTTCTCTATATTTGGCTGCTTGTGCCGTGTG
TGACATTATGCCGGCTAGTCGACTGCCCAACAAGGTTGAGAGGGCAGCGGCTAGACAACC
TGGTACGGTGAAACCCGCCTATCGATGACCCCTACCACAAGGGAACAGACGGCGGGCAAT
ACCGTGGCGAGTGCCTGGTGGGTGACTGCCAGTGCGCCGTCGTAACGCGCGGTAAGGTGT
CGGGGGATGTCTTTGACTCCTCTTAAGGGACGTGCTACTCCCCCCGCAAGGGTGTTCTGT
GCTGGAGCTCTCAACCAGCAAAGGCACATGAGGCCAATGATCCCCTTCACAAATGTTGGG
GGGAGGATGGTATAAAGG------------------------------------------
------------------------------------------------------------
------------------------------------------------------------
------------------------------------------------------------
------------------------------------------------------------
--------------------------------------TAATTTGACTCAACACGGGAAA
ACTCACTAGGGCAAGAAAGCGGTACGATGGTCAGTATATCAGTATTTACCTGA--TTCGT
TTAGTGGTGGTGCATGGTCGT---------------------------------------
------------------------------------------------------------
------------------------------------------------------------
------------------------------------------------------------
------------------------------------------------------------
------------------------------------------------------------
------------------------------------------------------------
------------------------------------------------------------
------------------------------------------------------------
---------TCTTAGTTCGTGGA-GTGATTTGTCTGGTCAATTCCGCTAACGAGCGAGAA
CCTAACGTAGTCTAGTTGAGG--CCTC--GCGCAT----GCCGCC---ATGAAGCTGGCC
GGCTGGGGGCGTGCTCCGGCACACCAC-CCCTGGCTGCCGGCA-GA--------------
------------------------------------------------------------
-------------------------------------------------CCGGTGGCTGA
AAACGCGCTTGGCCC---------------------------------------------
--------------------------------TGGCCTGGC-AGGACTGGCCCC---AAC
AAGGGGTCGG-AAGG--GGGTCAATAACAGGT----------------------------
------------------------------------------------------------
------------------------------------------------------------
------------------------------------------------------------
------------------------------------------------------------
------------------------------------------------------------
------------------------------------------------------------
------------------------------------------------------------
------------------------------------------------------------
------------------------------------------------------------
------------------------------------------------------------
------------------------------------------------------------
-----------------------CAGT-GATGCCCT------------------------
------------------------------------------------------------
------------------------------------------------------------
------------------------------------------------------------
------------------------------------------------------------
------------------------------------------------------------
------------------------------------------------------------
-------------TAGATGC--TCTAGGCTGCACGCGCGCTACAATGGGTGGAG--CATC
GGGTAT------------------------------------------------------
-CCTGTGCC-------GACGGGCAA-CGGGTAATCCTC-GAAAGCCCCCCAT-GTCTGGG
ATCGGGGCGTGTAACGCGCC--------CCGTAAACAAGGAATTTCTAGTAGTCACG-GG
TCACTAGCCCGTGACGATTCTGTCCCTGCTCT----------------------------
------------------------------------------------------------
------------------------------------------------------------
------------------------------------------------------------
------------------------------------------------------------
------------------------------------------------------------
------------------------------------------------------------
------------------------------------------------------------
------------------------------------------------------------
-------------------------TTGTACACACCGCCCGTCGCTCCTACCGATTGGAC
TGAGAGGTGAGTAGCTTGGACGGCCTT-GGTGG---------------------------
------------------------------------------------------------
------------------------------------------------------------
------------------------------------------------------------
------------------------------------------------------------
------------------------------------------------------------
------------------------------------------------------------
------------------------------------------------------------
------------------------------------------------------------
------------------------------------------------------------
------------------------------------------------------------
------------------------------------------------------------
------------------------------------------------------------
------------------------------------------------------------
------------------------------------------------------------
------------------------------------------------------------
------------------------------------------------------------
------------------------------------------------------------
------------------------------------------------------------
------------------------------------------------------------
------------------------------------------------------------
------------------------------------------------------------
------------------------------------------------------------
------------------------------------------------------------
------------------------------------------------------------
------------------------------------------------------------
------------------------------------------------------------
------------------------------------------------------------
------------------------------------------------------------
------------------------------------------------------------
------------------------------------------------------------
------------------------------------------------------------
------------------------------------------------------------
-----------GGGGTAACACCCCCACCGCGGGTGGAAGGGCC--GCGAACCTCCCGGTC
TAGAGGAAGGAGAA
>Hemitrichia_abietina_JX481293
------------------------------------------------------------
------------------------------------------------------------
------------------------------------------------------------
------------------------------------------------------------
------------------------------------------------------------
------------------------------------------------------------
------------------------------------------------------CCA-GC
GG-ATAAC-CACGGTAATTCTG-TGGCTAATACGTGC-AACCCGGCCCCGCTCGATCCGC
TGCTTTAGAGGCGGGCGAGGGCCGGCCACCTGGGCTGCCACCAACGGCCCTCCCACTGGG
GGGGGCTAAGCGTGAATGCTCGGGTGGGGTC-----------------------------
------------------------------------------------------------
------------------------------------------------------------
------------------------------------------------------------
------------------------------------------------------------
CTG---AC-CGGT-CCAA------------------------------------------
------------------------------------------------------------
-------------------------TAACCTACCGGC---TCAGGAGATGGGTTTCTGAC
CTATCA-ACT-TGAAGATACGGGCCGGACAGGC-CTTGGTGATAACGGGTACAGAGGATC
AGGGTTCGATCCTGGAGAGGTAGCCTGAGAGATCGCTACCACTTCTAAGGAAGGCAGCAG
GCGCGCAACGTTCCCAATGGGG---------GCTCC--------CCTGAGGACGTGACGG
GGCATAGCAATACGCCGCCC--ACAAG----GGCGGGGTAATTGA-AATGGGGGCATTTT
AAATC-CCTCACCG-------AGTAGCAATTGGAGGACAAGTCTGGT-------------
------------------------------------------------------------
------------------------------------------------------------
------------------------------------------------------------
------------------------------------------------------------
------------------------------------------------------------
------------------------------------------------------------
------------------------------------------------------------
------------------------------------------------------------
------------------------------------------------------------
------------------------------------------------------------
------------------------------------------------------------
------------------------------------------------------------
------------------------------------------------------------
------------------------------------------------------------
------------------------------------------------------------
------------------------------------------------------------
------------------------------------------------------------
------------------------------------------------------------
--------------------------------------------------------GCCA
GCACCCGCG---------------------------------------------------
------------------------------------------------------------
------------------------------------------------------------
------------------------------------------------------------
------------------------------------------------------------
------------------------------------------------------------
------------------------------------------------------------
------------------------------------------------------------
------------------------------------------------------------
------------------------------------------------------------
------------------------------------------------------------
------------------------------------------------------------
------------------------------------------------------------
------------------------------------------------------------
------------------------------------------------------------
------------------------------------------------------------
------------------------------------------------------------
------------------------------------------------------------
------------------------------------------------------------
------------------------------------------------------------
--------------------------------------GTAATTCCAGCTCCAATAGCAT
CTTATTAAGTTGTTGCAGTTAAAACGCTCGTAGTCCGA-GTCGG--TGGCGTGCTGGACG
GG----------------------CAGTAGCTGGGGGGGTCCGGGCCGGTACCAGTCCCA
TTTGAGGGGCTCGGTGGCTGTGCCTCCCCCCCGGTGGCCCCCGCTTGGC-----------
-----------GCCCATCGGCTAGCCCGGGGCAGGCAATCCCGTCTGGAAGCCGCGGGCG
GCGGGG------CTTCAGTGCCCCGCTGCTCA----------------------------
------------------------------------------------------------
------------------------------------------------------------
------------------------------------------------------------
------------------------------------------------------------
------------------------------------------------------------
-----------------------------------------------CCCCGGGCACCTT
TCTTTGAA--TAAATTCGAGCGCCCAAGGCAGGCCGATT----ACGGCCGCTTATATATA
-------------------------------CTGAAG-GCTG-C-AGCAAAGGATAACGG
AACAGGGCGTCAGCCCGGTCT---CGTTGGTACCGAG-----------------------
------------------------------------------------------------
----------------------------------------CAGCGCAA-TGATTAATTGG
GGGGATCGGGGTCGGCCGCATGGCGGGGGTAGGGGTGAAATCCGTTGATCCTCGCCAGGC
GAACTAAAGCGAAAGCAGCC-GACAAGTACCCTTTCTTTGATCAAGAACGAAAGTCTGGG
GATCGAAGATGAT-----------------------------------------------
------------------------------------------------------------
------------------------------------------------------------
------------------------------------------------------------
------------------------------------------------------------
------------------------------------------------------------
------------------------------------------------------------
------------------------------------------------------------
------------------------------------------------------------
------------------------------------------------------------
------------------------------------------------------------
------------------------------------------------------------
------------------------------------------------------------
------------------------------------------------------------
------------------------------------------------------------
------------------------------------------------------------
------------------------------------------------------------
---CAGATACCATCGTAGTCCAGACCCTAAATGATGCCGACCATGGATGGGTGTC-AGTC
CATCC------CGACCCGGCCCGGACCTTGT--------------GGGAAACCATCAAGT
GCTTGGGCTCCGGGGGGAGTATGGTCGCAAGACTGAAACT--------------------
------------------------------------------------------------
------------------------------------------------------------
------------------------------------------------------------
------------------------------------------------------------
------------------------------------------------------------
------------------------------------------------------------
------------------------------------------------------------
------------------------------------------------------------
------------------------------------------------------------
------------------------------------------------------------
------------------------------------------------------------
------------------------------------------------------------
------------------------------------------------------------
---------------------------------------------------------TAA
AGGAATTGACGGAAGAG-CACACAAGGAGT------------------------------
------------------------------------------------------------
------------------------------------------------------------
------------------------------------------------------------
------------------------------------------------------------
----------------------------GGAGCCTGCGGCTTAACTTTAGGCCGCCCAAC
CCACAGACGAACGTTCTCACTACCTGGGCGTTCGTCTGTGGCGAGTCAAGCACCCATGAA
GGGATGAGTGGGTCGCTGGCAAGACAACCTGGAACGGTGGAACCCTCTGCTCGATGACGC
TCTGGGATTGGCTCCTGGGCAACAGAATGAGGGCAATACCGTGGTGAGTAGCCCTAAGGG
TACCTTTAGGGCTGCCATCGTAACGCGCGCTAAGGTGTCGGTGGGCTGGGCTTACACCCA
GCCTGCTTAAGGTACGTGCTACTCCCCCCGTAAGGGTGCATCACACTGGAGCTCTCATCC
AGTAAAGGTGTGGTGAGCCGATGATGCTGGTCAAAAATGGCCAGAGGAGGCTGGTACAGC
CCTGCACAGCCCGCGAGGGCAGCAGGGCTACAGG--------------------------
------------------------------------------------------------
------------------------------------------------------------
------------------------------------------------------------
------------------------------------------------------------
------------------------------------------------------------
------------------------------------------------------------
------------------------------------------------------------
------------------------------------------------------------
------------------------------------------------------------
------------------------------------------------------------
------------------------------------------------------------
------------------------------------------------------------
------------------------------------------------------------
------------------------------------------------------------
------------------------------------------------------------
------------------------------------------------------------
------------------------------------------------------------
------------------------------------------------------------
--------------------------------------TAATTTGACTCAACACGGGGAA
ACTTACCAGGGCAAGAAAGGCTTAGGATGGACAGCCAATCAGGGCTTTCCAGA--TCGTT
TTAGTGGTGGTGCATGGTCGT---------------------------------------
------------------------------------------------------------
------------------------------------------------------------
------------------------------------------------------------
------------------------------------------------------------
------------------------------------------------------------
------------------------------------------------------------
------------------------------------------------------------
------------------------------------------------------------
---------TCTTAGTTCGTGGA-GTGATTTGTCTGGTCTATTCCGCTAACGAGCGAGAA
CCCAGCCTTCCGTGGTTAGGG--CAAG---GACAA----TGGGGCTG-CCCTCCCGGTGT
CTCCCCTCGTCTCGGGCTGGGCAACCGGCCTGGGGTGGG---------------------
------------------------------------------------------------
------------------------------------------------GGGGGGTGCTTG
GG-CGGCCTTGTTCCGGCGCCAT-------------------------------------
--------------------------------CGATCCGGG-GGCACCAGCTTC---GTT
AAGGGGCTGG-AGGC--GGGTCAATAACAGGT----------------------------
------------------------------------------------------------
------------------------------------------------------------
------------------------------------------------------------
------------------------------------------------------------
------------------------------------------------------------
------------------------------------------------------------
------------------------------------------------------------
------------------------------------------------------------
------------------------------------------------------------
------------------------------------------------------------
------------------------------------------------------------
-----------------------CAGT-GATGCCCT------------------------
------------------------------------------------------------
------------------------------------------------------------
------------------------------------------------------------
------------------------------------------------------------
------------------------------------------------------------
------------------------------------------------------------
-------------TAGATGC--TCTGGGCCGCACGCGCGCTACAATGGGGTGAG--TAGC
GGGTTCA-----------------------------------------------------
-CCTGTGCC-------GAAGGGCGG-CGGGTAATCCTC-GAAAGCCCCCCAT-ATCCGGG
ATAGGGACGTGTAACTCGCC--------CCTCCAACAAGGAATTTCTAGTAGTCATG-GG
TCACCAGCCCGT
>Hemitrichia_calyculata_JX481294
-------------------------------n----------------------------
-------------GAAG--TAGTAGCTCGAT-----------------------------
--------------------------CCGAATCTGCGGGAGGCTCCGTATATCTGTTATA
A-CCTTCCGCCCGGATTCG-----------------------------------------
------------------------------------------------------------
------------------------------------------------------------
------------------------------------------------------ACC-AC
GG-ATATC-CTAGGTAATTCTT-AGGTTAATACGTGT-ACCGACGAGCTGGCAAAGGGGG
GGCTGGCTAACCCCAGCCCCCCCGTTAGGTTCAGCTCGGGGCTTGCACGCCCTACCAAGG
CTCCCCTTAACAGGGGTGAATGGCGGGAAGGCGGGCAAG---------------------
------------------------------------------------------------
------------------------------------------------------------
------------------------------------------------------------
--------------------------------------------------------CGTG
CCAG--AC-CGTC-CCT-------------------------------------------
------------------------------------------------------------
---------------------------GAGG--CGGT---GTGGGCGATGGACACCAGAC
CTATCA-ACC-TTGGTGCCGGGGCGAGCCCAGC-ACCGGTGATAACGGGTACAGAGGATC
AGGGTTCGGTCCTGGAGAGGTAGCCTTAGAGATCGCTACTACTTCTAAGGAAGGCAGCAG
GCGCGCAACGTTCCCCATGGGT---------ATGCCCC------CCTGAGGACGTGACGG
GGCATAGCAACGCGGTACCG--TAATC----GGTTCCGCGATTGC-AATGGGGCGGATTT
AGATC-CCCCGCCG-------AGTAACGATTGGAGGACAAGTCTGGT-------------
------------------------------------------------------------
------------------------------------------------------------
------------------------------------------------------------
------------------------------------------------------------
------------------------------------------------------------
------------------------------------------------------------
------------------------------------------------------------
------------------------------------------------------------
------------------------------------------------------------
------------------------------------------------------------
------------------------------------------------------------
------------------------------------------------------------
------------------------------------------------------------
------------------------------------------------------------
------------------------------------------------------------
------------------------------------------------------------
------------------------------------------------------------
------------------------------------------------------------
--------------------------------------------------------GCCA
GCACCCGCG---------------------------------------------------
------------------------------------------------------------
------------------------------------------------------------
------------------------------------------------------------
------------------------------------------------------------
------------------------------------------------------------
------------------------------------------------------------
------------------------------------------------------------
------------------------------------------------------------
------------------------------------------------------------
------------------------------------------------------------
------------------------------------------------------------
------------------------------------------------------------
------------------------------------------------------------
------------------------------------------------------------
------------------------------------------------------------
------------------------------------------------------------
------------------------------------------------------------
------------------------------------------------------------
------------------------------------------------------------
--------------------------------------GTAATTCCAGCTCCAATGGCAT
CTCGTTAAATTGCTGCAGTTAAAACGCTCGTAGTCAGG-GTTGG--GTGCAGCCTGGGGC
CC----------------------AAGTACCCTGGGGATATAATCCGTTGAGCTGGCCCA
GTGCCTGGGATGGAAGCATCTTATCCCCGCCTGGGTTTCAGAACCGGCACCCCCAGGGGA
ACAGCCTGCCA-------------------GGCCCACCTACTATGC-----CCTGAAGAA
GGGGGAATTGGGCTTCACTGCTCGTCCCCTCG----------------------------
------------------------------------------------------------
------------------------------------------------------------
------------------------------------------------------------
------------------------------------------------------------
------------------------------------------------------------
-----------------------------------------------ACCAGGGCAGCAT
ACCTTGAA--TAAATTCGAGCGCTCAATGCAGGTCTTA-----AGGGCCAAACA------
--------------------------------TGGAG-ATCC-C-AGCAAGGAATATTGG
AACAGGACTCGTCCTGGTC-----CCCTGGTACTGGGG----------------------
------------------------------------------------------------
-----------------------------------------CGATTAA-TGATTGATAGG
GGGGATCGGGGTGGGCCACATGGCGGGGGTAGGGGTGAAATCCGATAATCCTCGCCAGGT
GAACCAAGGCGAAAGCAGCC-CGCCAGTACTCTTTCTTTGATCAAGAACGAAAGTCTGGG
GATCGAAGACGAT-----------------------------------------------
------------------------------------------------------------
------------------------------------------------------------
------------------------------------------------------------
------------------------------------------------------------
------------------------------------------------------------
------------------------------------------------------------
------------------------------------------------------------
------------------------------------------------------------
------------------------------------------------------------
------------------------------------------------------------
------------------------------------------------------------
------------------------------------------------------------
------------------------------------------------------------
------------------------------------------------------------
------------------------------------------------------------
------------------------------------------------------------
---CAGATACCGTCGTAGTCCAGACTATAAACCGTGCCGACCTGGGGTAGGCCGG-AGTC
CATCT------CGACTCGGCCCGGACCATGGAG------------GGGAAACCAT---A-
GTCC-GGCTCCGGGGGGAGTATGGTCGCAAGACTGAAACT--------------------
------------------------------------------------------------
------------------------------------------------------------
------------------------------------------------------------
------------------------------------------------------------
------------------------------------------------------------
------------------------------------------------------------
------------------------------------------------------------
------------------------------------------------------------
------------------------------------------------------------
------------------------------------------------------------
------------------------------------------------------------
------------------------------------------------------------
------------------------------------------------------------
---------------------------------------------------------TAA
AGGAATTGACGGA-----------------------------------------------
------------------------------------------------------------
------------------------------------------------------------
------------------------------------------------------------
------------------------------------------------------------
------------------------------------------------------------
------------------------------------------------------------
------------------------------------------------------------
------------------------------------------------------------
------------------------------------------------------------
------------------------------------------------------------
------------------------------------------------------------
------------------------------------------------------------
------------------------------------------------------------
------------------
>Licea_castanea_JX481295
-------------------------------n----------------------------
------------------------------------------------------------
------------------------------------------------------------
------------------------------------------------------------
------------------------------------------------------------
------------------------------------------------------------
------------------------------------------------------------
------------------------------------------------------------
------------------------------------------------------------
------------------------------------------------------------
------------------------------------------------------------
------------------------------------------------------------
------------------------------------------------------------
------------------------------------------------------------
------------------------------------------------------------
------------------------------------------------------------
------------------------------------------------------------
------------------------------------------------------------
------------------------------------------------------------
--------------------------------------------CCTGAGGACGTAACGA
AACATAACAATGTCGGGCCT--ATAA-----GGCCTGGCAATTGG-AATGGGGGCAATTT
AAATC-CCTCACCG-------AGTAACAATTAGAGGACAAGTCTGGT-------------
------------------------------------------------------------
------------------------------------------------------------
------------------------------------------------------------
------------------------------------------------------------
------------------------------------------------------------
------------------------------------------------------------
------------------------------------------------------------
------------------------------------------------------------
------------------------------------------------------------
------------------------------------------------------------
------------------------------------------------------------
------------------------------------------------------------
------------------------------------------------------------
------------------------------------------------------------
------------------------------------------------------------
------------------------------------------------------------
------------------------------------------------------------
------------------------------------------------------------
--------------------------------------------------------GCCA
GCACCCGCG---------------------------------------------------
------------------------------------------------------------
------------------------------------------------------------
------------------------------------------------------------
------------------------------------------------------------
------------------------------------------------------------
------------------------------------------------------------
------------------------------------------------------------
------------------------------------------------------------
------------------------------------------------------------
------------------------------------------------------------
------------------------------------------------------------
------------------------------------------------------------
------------------------------------------------------------
------------------------------------------------------------
------------------------------------------------------------
------------------------------------------------------------
------------------------------------------------------------
------------------------------------------------------------
------------------------------------------------------------
--------------------------------------GTAATTCCAGCTCTAATAGCAT
CTAATTGAGTTGTTGCAGTTAAAACGCTCGTAGCCCGG-CAAGG--TGCCCCGTTGGTTC
C-----------------------AAGTACTCCGCGGCCGTCTGGGCCCCTGCGCTTTGG
TCCCCCGCCCCGAAAGGGGAGGGCGGGTCTGGCCTGGGGACCGTGGCCGGGGGGGAAAGG
TCTCGGTGGGAGCGCCCCCTGCCGCCTGGGTTGGGGGGCATAAGATTTTGATAGCCAA--
------------------------------------------------------------
------------------------------------------------------------
------------------------------------------------------------
------------------------------------------------------------
------------------------------------------------------------
------------------------------------------------------------
----------------------------------------CCCCCTGGCCCAGGCAGCTT
ACTTTGAA--TAAATTTAAGCGCTAAAAGCAGCCCATT------GGGCA-----------
--------------------------------TTGAA-AACCGT-AGCAAAGAATAACGG
AATAGGAACCTGTTCCTTTCC---CGCTGGTGCATACTTTC-------------------
------------------------------------------------------------
-----------------------------------------AGGTTAA-TGATCAATTGG
GGCGATCGGGGTCGGCCACATGGCGGGGGTAGGGGTGAAATCCGTTGATCCTCGCCAGGT
GAACTAGTGCGAAAGCAGCC-GACAAGTACGCTTTCTTTGGTCAAGAACGAAAGTCTGGG
GATCGAAGATGAT-----------------------------------------------
------------------------------------------------------------
------------------------------------------------------------
------------------------------------------------------------
------------------------------------------------------------
------------------------------------------------------------
------------------------------------------------------------
------------------------------------------------------------
------------------------------------------------------------
------------------------------------------------------------
------------------------------------------------------------
------------------------------------------------------------
------------------------------------------------------------
------------------------------------------------------------
------------------------------------------------------------
------------------------------------------------------------
------------------------------------------------------------
---TAGATACCGTCGTAGTCCAGACCCTAAATGATGCCGACCATGGGTGGGCTAA-TGTC
CATCC------CGACCCGGCCCGAACCTTGT--------------AAGAAATTAT-AAGT
GTTTGGGCTCCGGGGGGAGTATGGTCGCAAGACTGAAACT--------------------
------------------------------------------------------------
------------------------------------------------------------
------------------------------------------------------------
------------------------------------------------------------
------------------------------------------------------------
------------------------------------------------------------
------------------------------------------------------------
------------------------------------------------------------
------------------------------------------------------------
------------------------------------------------------------
------------------------------------------------------------
------------------------------------------------------------
------------------------------------------------------------
---------------------------------------------------------TAA
AGGAATTGACGGAAGAG-CACACAAGGAGT------------------------------
------------------------------------------------------------
------------------------------------------------------------
------------------------------------------------------------
------------------------------------------------------------
----------------------------GGAACCTGCGGCT-------------------
------------------------------------------------------------
------------------------------------------------------------
------------------------------------------------------------
------------------------------------------------------------
------------------------------------------------------------
------------------------------------------------------------
------------------------------------------------------------
------------------------------------------------------------
------------------------------------------------------------
------------------------------------------------------------
------------------------------------------------------------
------------------------------------------------------------
------------------------------------------------------------
------------------------------------------------------------
------------------------------------------------------------
------------------------------------------------------------
------------------------------------------------------------
------------------------------------------------------------
------------------------------------------------------------
------------------------------------------------------------
------------------------------------------------------------
------------------------------------------------------------
------------------------------------------------------------
------------------------------------------------------------
------------------------------------------------------------
--------------------------------------TAATTTGACTCAACACGGGAAA
ACTTACTAGAGTAACAGAAGGTGAAGATGGACAGCCTATCCGGCCTTTCCAGA--TTCTT
TCAATGGTGGTGCATGGTCGT---------------------------------------
------------------------------------------------------------
------------------------------------------------------------
------------------------------------------------------------
------------------------------------------------------------
------------------------------------------------------------
------------------------------------------------------------
------------------------------------------------------------
------------------------------------------------------------
---------TCTTAGTTCGTGGA-GTGATTTGTCTGGTCAATTCCGCTAACGAGCGAGAA
CCCGCACTCCTGTAGTTAGGG--GCGCC--GACCA----AGGTCC---GACTGTTCAACG
CCTAGCCCTGACCCCCTGGTAACGGGGGGATGGGGCAGGGATGGGGGACG----------
------------------------------------------------------------
------------------------------------------------ACTGGGCCCGTA
AGAGCCGGCTGCCT----------------------------------------------
-------------------------------TCGAGCTCAG-GTGACCGGTCCC---GTT
AAGGGGCTGG-ACGT--GGGTCAATAACAGGT----------------------------
------------------------------------------------------------
------------------------------------------------------------
------------------------------------------------------------
------------------------------------------------------------
------------------------------------------------------------
------------------------------------------------------------
------------------------------------------------------------
------------------------------------------------------------
------------------------------------------------------------
------------------------------------------------------------
------------------------------------------------------------
-----------------------CAGT-GATGCCCT------------------------
------------------------------------------------------------
------------------------------------------------------------
------------------------------------------------------------
------------------------------------------------------------
------------------------------------------------------------
------------------------------------------------------------
-------------TAGATAC--TCTAGGCTGCACGCGCGTTACAATGGGGGGGT--GAGC
GGGTGACC----------------------------------------------------
-TATGTGCC-------TTACGGCCG-CGGGTAATCCTC-CAACGCCCCCCCT-ATCCGGG
GTTGATCCATGTAACTTGGG--------TCATTAACAAGGAATTTCTAGTAGTCACC-GG
TCATCAGCCGGTGGCGATTACGTCCCTGCTCT----------------------------
------------------------------------------------------------
------------------------------------------------------------
------------------------------------------------------------
------------------------------------------------------------
------------------------------------------------------------
------------------------------------------------------------
------------------------------------------------------------
------------------------------------------------------------
-------------------------TTGTACACACCGCCCGTCGCTCCTACCGATTGGAC
CGCATGATGAGGACCGCAGAGTTTGCCCCCCTACT-------------------------
------------------------------------------------------------
------------------------------------------------------------
------------------------------------------------------------
------------------------------------------------------------
------------------------------------------------------------
------------------------------------------------------------
------------------------------------------------------------
------------------------------------------------------------
------------------------------------------------------------
------------------------------------------------------------
------------------------------------------------------------
------------------------------------------------------------
------------------------------------------------------------
------------------------------------------------------------
------------------------------------------------------------
------------------------------------------------------------
------------------------------------------------------------
------------------------------------------------------------
------------------------------------------------------------
------------------------------------------------------------
------------------------------------------------------------
------------------------------------------------------------
------------------------------------------------------------
------------------------------------------------------------
------------------------------------------------------------
------------------------------------------------------------
------------------------------------------------------------
------------------------------------------------------------
------------------------------------------------------------
------------------------------------------------------------
------------------------------------------------------------
------------------------------------------------------------
---------GCCCGCGAGGGCACCGGGGGGTGGGCGAAGCGGT--TCAAATTCTCTGGTC
TAGAGGAAGGAGAAGTCGTAACAAGGTATCCGT
>Licea_marginata_JX481296
--------------GATCCTGCCAGAAT-TATATGCTTGTTCTAAAGATT-AAGCCATGC
AAGTTCC---GATAGAGT-GGTAAG-----------------------------------
--------------------------CTCAATCTGCAAATAGCTCCGTATATCTGTTTCA
A-CCCTC-GTGGTTTATGAATGTAAACCAGAATCTAAGGTTCCGCCCGGGGGCGAAGGGG
GAGGAGGGCTCGCGCTCGCCTCCCCTCGAGCCCCAGGGCGGCGACACGCTCGGCTCTGGA
A-----------------------------------------------------------
-----------------------------------------------------GGTATAC
GG-ATAAC-CACGGTAATTCTG-TGGCCAATACGTGT-TCAAA--GGCGCGCCGCAAGGC
GCGCC--------GAGATCTTTCGAGCCATAACCAA-CGGGGGCCTCACGG---------
------------------------------------------------------------
------------------------------------------------------------
------------------------------------------------------------
------------------------------------------------------------
---------------------------------------------------------CCT
CTC---AC-CGGG-AGCAGTCGAAAGCTGTCTGACGGGTT--------------------
------------------------------------------------------------
---------------------------TATC--CCGC---AGTCCACCGGGGATTCAGAC
CTATCA-ACT-TGACGGCAGGATCGAGGCCTGC-CATGGTCGTAACGGGTACAGAGGATA
AGGGTTCGATCCTGGAGAGGTAGCCTTAGAAACAGCTACCACTTCTAAGGAAGGCAGCAG
GCGCGCAACGTTCTCAATGGGG---------TTTCC--------CCTGAAGACGTGACAG
AACATAGCAATACTGGGCCT--TCAA-----GGTTCGGTAATTGA-AATGAGAACATTTT
AAATC-CCTTATCA-------AGTAACAATTGGAGGACAAGTCTGGT-------------
------------------------------------------------------------
------------------------------------------------------------
------------------------------------------------------------
------------------------------------------------------------
------------------------------------------------------------
------------------------------------------------------------
------------------------------------------------------------
------------------------------------------------------------
------------------------------------------------------------
------------------------------------------------------------
------------------------------------------------------------
------------------------------------------------------------
------------------------------------------------------------
------------------------------------------------------------
------------------------------------------------------------
------------------------------------------------------------
------------------------------------------------------------
------------------------------------------------------------
--------------------------------------------------------GCCA
GCACCCGCGAACTGGTTCCGCGGGGACAGTGGGGGCGCTCACGCGCCCACCGCTAGTCGA
CCTGGGCGACAAGCCCGGTCCGTCGGCAACACCATCTAAGTGCGGGAAACTCCTAAAGCC
TCGCTCTACCAAGTGACTGGGGAAACCCAGGGCACGGCGCACGCTAAATGCCTGCGGTAC
GGTAACAAAGCGCGGGGATGCGACAATGGACGATCCGCAGCCAAGCTCCCACACTGCCGA
CGGCAGTGGAGAGCGCAGTCCAGAGGCTAAATGATGGCGGGGGCGGGCTCTCTCTGTATC
CCGCCCCTATGATATAGTCCGTCCGCCGAGAGATCGGTCCCGCAAGGGGGGGAGCCTTCT
CCGGCTCCCCGGGCAAATCGCGCGCGAGCTTTAAGCTCGCAAGCGACG------------
------------------------------------------------------------
------------------------------------------------------------
------------------------------------------------------------
------------------------------------------------------------
------------------------------------------------------------
------------------------------------------------------------
------------------------------------------------------------
------------------------------------------------------------
------------------------------------------------------------
------------------------------------------------------------
------------------------------------------------------------
------------------------------------------------------------
------------------------------------------------------------
--------------------------------------GTAATTCCAGCTCCAATAGCAT
CTAGTTAAGTTGTTGCAGTTAAAACGCTCGTAGTCGAC-ACCTG--CGCCCCGTTGCTGC
C-----------------------CAGTAGCCTCTGCGCAGGGCGTCCCACCTCGAGATA
GTCTTGCGCTCTGGCGACAGGTAGCGATGGGAGCGTGTAATTATTGCCCGGCAATCGGGA
GTCAGCTACT--------------------------------------------------
------------------------------------------------------------
------------------------------------------------------------
------------------------------------------------------------
------------------------------------------------------------
------------------------------------------------------------
------------------------------------------------------------
------------------------------TCGCTGTGGGCGCCCCACGCCGGGAACCTT
ACTTTGAG--TAAATTTGCGTGCTCGAAGCATGACAAT------GT--------------
--------------------------------CTGAA-AACTCC-AGCAAAGAATAACGA
AAGAAGAGCCCATCTTCGCG----CGTTGGTTCGAAT-----------------------
------------------------------------------------------------
---------------------------------------TAGGGCTAA-TGATTGATAGA
GGTAAGCGGGGCTGGTCACATGGTGGGGGTAGGGGTGAAATCCGTTGATCCTCGCCAGGT
GAACTACTGCGAAGGCATCC-AGCAAGTATACACTCTTTGATCAAGAACGAAAGTCTGGG
GATCGAAGACGATTGGACCACGGTCTAGGTCGTCGAAAGCCTGGCACGGTTTTGCCCGTG
CGGAGCAGGCTAGTGGGCCCGCGCCCTACCCTACCCTCCCACGCCGTCCGCGGACGGAGC
GGGAAGCGGTGGGGCGCGCCCGCGACATCGACAAATTGCTGGGACACCCTCCAAAGCCCC
GTCGCTCCAAGCGGCCTGCCGGCGACGGCAGCCGCGGCCGTGCAGCTCTGCACGGGTAAG
GACATAGACGACGGGGATTGGGCGATCAGCAGCCGGGACTTTCCTCGCCACCCCTCGGTA
CCCTTCGGGCCGAGGGCGATCGCGGGGAAGCCCCGAGTTCACAGACTAAATGTCGGTGGG
TCGGCCCTCCCCCCTCTAACCGGGGGGCGGTGCCCGGCTTAAGATATAGTCGAGCCCCGG
CCCAAAAGGCCGGGGACGGTGCCTG-----------------------------------
------------------------------------------------------------
------------------------------------------------------------
------------------------------------------------------------
------------------------------------------------------------
------------------------------------------------------------
------------------------------------------------------------
------------------------------------------------------------
------------------------------------------------------------
------------------------------------------------------------
---CAGATACCGTCGTAGTCCAGACCCTAAATGATGCCGACCATGGATGGACTTT-CGTC
CATCC------CGACCTAGTCTGGACCTTGT--------------GGGAAACCATTAAGT
TTTTGGGCTCTGGGGGGAGTATGGTTGCAAGACTGAAACTCGTTCCTGGGTTTCGAGAAT
GGGCCCCTCGCTTGGGTCCGTTAGTCCGCGGAGCCACCATCGACCAAGCGTCGGCGGTGC
CCTCGGGCGACACGAACAAACTGCTGGGACCTGCTAAAGCCAGGCTGCACCTACCGCCCG
CCGCAAGGCGTCGCGGTGCCAGGGTTAAACTCCTGGGTACGGTGAAAGTCAGCCTGGATA
ACCGATGCAGTATCAGTAACCAAGCCCTGTATCGCGCGCGATACACAGGGGTGCAGTTCA
CAGGCCAAATGTTAGTGGGGGGCGTGCGTGCAGGGCCGAGAGGGTTTACCCACGCGCCCC
TTAAGATATGGTCGGGCTCCCGGCGAGATTGCCGGGGGGAGATACCG-------------
------------------------------------------------------------
------------------------------------------------------------
------------------------------------------------------------
------------------------------------------------------------
------------------------------------------------------------
------------------------------------------------------------
------------------------------------------------------------
---------------------------------------------------------TAA
AGGAATTGACGGGAGAG-CACACAAGGAGT------------------------------
------------------------------------------------------------
------------------------------------------------------------
------------------------------------------------------------
------------------------------------------------------------
----------------------------GGAGCCTGCGGCT-------------------
------------------------------------------------------------
------------------------------------------------------------
------------------------------------------------------------
------------------------------------------------------------
------------------------------------------------------------
------------------------------------------------------------
------------------------------------------------------------
------------------------------------------------------------
------------------------------------------------------------
------------------------------------------------------------
------------------------------------------------------------
------------------------------------------------------------
------------------------------------------------------------
------------------------------------------------------------
------------------------------------------------------------
------------------------------------------------------------
------------------------------------------------------------
------------------------------------------------------------
------------------------------------------------------------
------------------------------------------------------------
------------------------------------------------------------
------------------------------------------------------------
------------------------------------------------------------
------------------------------------------------------------
------------------------------------------------------------
--------------------------------------TAATTTGACTTAACACGGGAAA
ACTCACTAGAGCAAGAAAAGGGGATGAGTGTCAGCGCAGCCGCACTTACACGA--TTCCT
TCAGTGGTGGTGCATGGTCGTCGACAAGGGAGCGATAGATAGGGGCCCTGAAAGCCCCTA
GTGGTCTCCGGGCCTCCCGTCCGATATCCGGCGGGATGGCTCGGTACCGCGACACCGTCA
AATTGCGGAGACACCCCCGGCATTCACTTGCCGGCGGTCGAGCTTACCAAGCACTCCACC
CCTTCGTGGTGGACCGTGCGGCCACGGCATCTTGCCTGGGTATGGTTATAAGAGCTCGCC
GTTTCGTGGGGGCGATCCGCAGCCTAGCATGTTCCGCCCCTGGGCTCTTTTGCCCACGGT
CGGGGCCGCAAGGTCCAACGACTCGACGATGGTGGACCCCTTCCCTCGCCTCTCCGCTTT
TTTGCAGGGCCATCGCCCGGCATTAAGCGAGGAGGGCACGGCGGGAAAGGGCTTCAGATA
GAGTCTGGCCGTCTCTGCAGAGAGACCCGCGCGAATAAGGGGGTTTATCCCTCGAAGCCC
GCGGGAAGGTGCCCGACGCCGGAATGCCCCCCGGGGCAGGAAGGCCGAGAGCGTGCCTCG
GAACAGCCGTCTTAGTTCGTGGA-GTGATTTGTCTGGTCTATTCCGCTAACGAGCGAGAA
CCCAATCTCCTGTAGTTGAAC--GTGCG--GGCAC----GCCCAT---GCTTCACGG---
------------------------------------------------------------
------------------------------------------------------------
--------------------------------------------------CACAGGCTGA
AACACGCCCGCATGAT--------------------------------------------
-------------------------------CTATCCTAAG-GAGACCGGCTGC---GAC
AAGTGGCTGG-AAGT--GGGTCAATAACAGGTTAACACGGGCCTGTGACAGCGGCCCCCG
CAAAGGGGCCACTAGTCCTCGGCAGCCCTCCGGGGTTGCCGTGGGCGATACCAACAAACT
GCGGGGACTCTCCTTACGCACTCCGGCACCGACGGCCTGGCGCAAGCCACGGCCGGACCC
AGGGTAATGACCTGGGGTGTGGTAAAAGCCCGGCGATGCTCGGAAGACCCGCAACCAACC
CCGGCCTCCTCGCCCAGCTCTCCCGCTGGCCTGGAGTCCCGGGGACAGTCCACAGGCTAA
ATGTTGGTGGGTGGCGGCGTTAACTCGCCGTCGCCTAAGATATAGTCGAGGCGCCCGGCG
AAAGCCCGGCGAAAAGGTCCG---------------------------------------
------------------------------------------------------------
------------------------------------------------------------
------------------------------------------------------------
------------------------------------------------------------
------------------------------------------------------------
-----------------------CAGT-GATGCCCTTTAGTTCTAGGGGCAAATTGCCGA
GGGTTAGCTCGCTTAATGCGTGCGTCCTCACCGGCAAGTCCCTGCCTTTCCGGAGGCAGC
GGGCGACATCACCGAACTGCGGGGAACCCTCTCCGGGGGCTGCCTACCAAATCCCACGGC
GAAGGCCGTGGGATCACCAGCGCTTTCGCGCTGGGTAAGGTAACAATGGCAGCCACCGAG
GCAACCCGCACCCGAGGCAGTGCCACTCCACGCGACGCACCGTCGCCAAGGAGGGCGCCG
CCCGGTCCACAGACTAAGTGGTGATGGGTCTCGGCAGTCCCCGTGGGCAAATGTCCACGA
CAGGCTGCCGCGGCTTAAGATATAGTCGAGCCCGGCCCAGCTCCCTCTAGGGGGCGGGGA
ACGGGGCACCTTGTAGATGC--TCTAGGCTGCACGCGCGCTACAATGGGAGGAA--GAAC
GCGTTA------------------------------------------------------
-TCGGTGCC-------TAACGGCTATCGG-TAATCGTCCAAAACCTCTC-CT-GTCCGGG
ATTGGCCTTTGTAA-CAGGG--------CCATGAACAAGGAATTTCTAGTAGTCATC-GG
TCACTAGCCGGTGGCGATTATGTCCCTGCTCTCTGTATGGGGAGCGAAAGGGCGCCATTT
AGCGGATGGCGCCCAGTGGCTTCGTGGATCGAAGCCGCGACACCAACCAATTGCGGGGAC
ACCCTAGCAGGTAAGCGCGCCAAGCGGGCATCGAGAGGTGCCCGCGGCCACGGCGAAAGC
CCTGGGTACGGCAACAGTCGCGACCTCCTGACTCCCTTTCCGGCCCCTCGCCCCTCGGGC
GTGGGCCGGGTTAGAGGCGGGTTAAAGTGGGCTATCCGCAGCCGTGCCCCCCGTGGGCGT
GCTCTCCGGAGCGCGCGGGACGGGGGGCGCAGTTCACAGACTAAATGTTGGTGGGTGGCG
GGGGGAAGCCCGGTCTTTGGATCGAGCCCTCCCCGTCGCCTAAGATATAGCCGATCCTCC
CAGGCAACTGGGCCCCCAAAGGGGGGCGGGGCCCGTAACAAGCGGGCCACGGGTAAAAAA
ACTTGAG-----------------------------------------------------
-------------------------CTGTACACACCGCCCGTCGCTCCTACCGATTGGGC
CAGCTGATGAGGAACCTGGTCTTTTTCGACCCA---------------------------
------------------------------------------------------------
------------------------------------------------------------
------------------------------------------------------------
------------------------------------------------------------
------------------------------------------------------------
------------------------------------------------------------
------------------------------------------------------------
------------------------------------------------------------
------------------------------------------------------------
------------------------------------------------------------
------------------------------------------------------------
------------------------------------------------------------
------------------------------------------------------------
------------------------------------------------------------
------------------------------------------------------------
------------------------------------------------------------
------------------------------------------------------------
------------------------------------------------------------
------------------------------------------------------------
------------------------------------------------------------
------------------------------------------------------------
------------------------------------------------------------
------------------------------------------------------------
------------------------------------------------------------
------------------------------------------------------------
------------------------------------------------------------
------------------------------------------------------------
------------------------------------------------------------
------------------------------------------------------------
------------------------------------------------------------
------------------------------------------------------------
------------------------------------------------------------
------------GCTCAAAAGGCTGGCAAGAGGCTGGAAGGGT--TCAAATTTTCTGGTC
TAGAGGAAGGAGA
>Licea_parasitica_JX481297
-------------------------------n----------------------------
------------------------------------------------------------
-----------------------------------------GCTCCGTTTATCTGTTACA
A-CTCTCCCGGTAGCGCGTCATCCCTCAATACTCCCAGACTGGAGTGAGACGAGACACCC
GCGACCGGCGAGCGGCGACACCGGGAGGTGCGTGGTGAATATAATTATTGTTCCTGCGGC
AAGTGCGCGCTGGCCTTACGCTCACTCGGTAGGCCCACTTCTTACAGGTTCGTTCGCCCT
ACCACCAGGCGGGCCCGCCACGTGCACCCGGTGGTTCAAGTCGTTCCCACTACCCTACAC
GG-ATATC-CTTGGTAATTCTA-AGGCTAACACGTGC-TCAAGAGCTCGCCTCTGGCGAG
CTGTTCTTCTGGCCTCCAAACCCGGGGGCTTCGGTCGTTCACATCCTGAACAATCAGAAG
CTAACTGATCGGTGCCTT------------------------------------------
------------------------------------------------------------
------------------------------------------------------------
------------------------------------------------------------
------------------------------------------------------------
CGGC--AC-CGCC-----------------------------------------------
------------------------------------------------------------
----------------------------------------AGTCCGGAGAGGTTTCAGAC
CTATCA-ACC-TGATGGCATGGGAGCGGCAAGC-CATGGTTATAACGGGTACAGAGGATC
AGGGTTCGGTCCTGGAGAGGTAGCCTGAGAAATAGCTACTACTTCTAAGGAAGGCAGCAG
GCGCGCAACGTTCCCAGTGGGA---------TCATC--------CCTGAGGACGTGACGG
AACATAGCAATACCAGGCCT--TCGT-----GGCTTGGTAATTGT-AATGGGGGCGTGTT
AAATC-TCCCACCG-------AGTAACAATTGGAGGACAAGTCTGGTGGGATTCCAACCA
CGCCAGATGTTGGGAAGCGAAACAAACCGGCTGGAGGGATACCTTTTCCGCGGCAGGAGG
GATACCTTTTCCGCGGCAGGAGGGATACCTTTTCCGCGGCAGGAGGGATACCTTTTCCGC
GGCAGGAGAGGCACCTTTTCCGCGGCAGGAGGGACACCTTTTCCGCGGCAGGAGGGACAC
CTCTTCCGCGGCAGGAGAGGCACCTTTTCCGCGGCAGGAGAGGCACCTTTTCCGCGGCAG
GAGGGATACCTTTTCCGCGGCAGGAGGGGCACCTCTTCCGCGGCAGGAGAGGCACCTCTT
CCGCGGCAGGAGAGGCACCTTTTCCGCGGCAGGAGAGGCACCTTTTCCGCGGCAGGAGGG
ATACCTTTTCCGCGGCAGGAGGGACACCTCTTCCGCGGCAGGAGGGACACCTCTTCCGCG
GCAGGAGGGACACCTCTTCCGCGGCAGGAGGGACACCTCTTCCGCGGCAGGAGGGACACC
TCTTCCGCGGCAGGAGGGACACCTCTTCCGCGGCAGGAGGGACACCTCTTCCGCGGCAGG
AGGGACACCTCTTCCGCGGCAGGAGGGACACCTCTTCCGCGGCAGGAGAGGTACCTCTTC
CGCGGCTTGCTGGTTTGTCGATTGTTTCCTGGCAGAAAGCCGGGATAAGCTCCGGCTGTA
CATGTGTAAACTGCGAGGACGTCCAGGTAAGGGATAGCTACCGCGGTCTCGCCTTGAGAA
ATTAATCAGGGACCGTTCCCACCGGCTTGGAGCGCGCTAAGCGTTCGGGTGGTGAGAGCG
GGAGACGCAGCAGACGGAGAGAGACCGTTGGATGGTAATCAACGCTATCACAGGTGGCAC
CAGTCCTGCCAAGCCCTTCAGTGGGAAACCGCCTTGGATAATTTGCAGCGAAGCCCGCTA
TACCGCCCTGTCCGCAGGGCGGAGTGTGGGAACGTTCAGAGACTATAATCACGTGGGGGA
ATCGTTCCTGGGAATCCGGGTAGGTTCTCTTAAGGCATAGTCCACTCCCTGCAGAGATGC
AGCTGACTAGAGTACGGCAAGGTAGCTCTTGCCCAGGGTTGTCAGGCCCGCGGCGCTTGC
GCAAGCGAGTGCCACTCAGGGGAATTGTAAATACACCAGACAGGGCGGTCATGAGGGCCA
GCACCCGCG---------------------------------------------------
------------------------------------------------------------
------------------------------------------------------------
------------------------------------------------------------
------------------------------------------------------------
------------------------------------------------------------
------------------------------------------------------------
------------------------------------------------------------
------------------------------------------------------------
------------------------------------------------------------
------------------------------------------------------------
------------------------------------------------------------
------------------------------------------------------------
------------------------------------------------------------
------------------------------------------------------------
------------------------------------------------------------
------------------------------------------------------------
------------------------------------------------------------
------------------------------------------------------------
------------------------------------------------------------
--------------------------------------GTAATTCCAGCTCCAATAGCAT
CTAATTAAGTTGTTGCAGTTAAAACGCTCGTAGTCGAA-GCCAG--TGTCCTGGCGTAGT
CCTTCTTCCC--------------ACGTACGCGTTGAGACTCAGTCTCCGTGGCCGTGGA
TCGAGCGGGGCTGCGGTTGGTCTACTCAAAGGCTAGCACTGTCGCGGTA-----------
------------------------------------------------------------
------------------------------------------------------------
------------------------------------------------------------
------------------------------------------------------------
------------------------------------------------------------
------------------------------------------------------------
------------------------------------------------------------
-----------------------CAGGTTTCGATAGCTGATCGCGGCGGGCTGGCATCTT
TCTTTGAG--AAAAACTGAGTGCTCGACGCAGGCCGTT-----ACGGCC-----------
--------------------------------CTGAA-AGTTCT-AGCAAAGAATAACGG
ATAAGGATCCCCTTGTCC------CGTTGGTTCGAGGC----------------------
------------------------------------------------------------
-----------------------------------------GTATCAA-TGGTAAATAGG
GGCACTCGGGGCTGGTCACATGGCTGGGGTAGGGGTGAAATCCGATCATCCTAGCCAGGT
GGACGAGTGCGAAAGCAGCC-AGCAAGTCTGTTCCCGTTGATCAAGAACGAAAGTCTGGG
GATCGAAGACGATTGCCAGGGGGGAGTGGGGGTGCCAGGGAAACTCGCCGCGGCAGCGAG
AGCAACTCTCTTCCCAGGGGGAAAGAGGATCTCAGCCCCAGGGGAAAGAGGATCTCAGCC
CCAGGGGAAAGAGGATCTCAGCCCCAGGGGGAAGAGGTTCTCAGCCCCAGGGGAAAGAGG
TTCTCAGCCCCAGGGGAAAGAGGTTCTCAGCCCCAGGGGAAAGAGGTTCTCAGCCCCAGG
GGGAAGAGGATCTCAGCCCCAGGGGAAAGAGGACCTCAGCCCCAGGGGAAAGAGGACCTC
AGCCCCAGGGGAAAGAGGACCTCAGCCCCAGGGGAAAGAGGATCTCAGCCCCAGGGGAAA
GAGGATCTCAGCCCCAGGGGAAAGAGGATCTCAGCCCCAGGGGAAAGAGGATCTCAGCCC
CAGGGGAAAGAGGATCTCAGCCCCAGGGGAAAGAGGTTCTCAGCCCCAGGGGAAAGAGGT
TCTCAGCCCCAGGGGAAAGAGGTTCTCAGCCCCAGGGGAAAGAGGTTCTCAGCCCCAGGG
GAAAGAGGTTCTCAGCCCCAGGGGAAAGAGGTTCTCAGCCCCAGGGGAAAGAGGTTCTCT
CCCCCAGGGGAAAGAGGTTCTCTCCCCCAGGGGAGAGCAGTAATCTGCCGCTGCGACGCC
CGCTGTTTCCCCTCCCCAAGGTCGTCGAGAGCGCAGCCCAGCGCTAGTCGCGCCGCTATT
CCAGGGATTCTCTCTGCCCAAGCGTGCGGCAATGCCACCAAATTGCAGGGAAGCCCTCTA
TCCCCTCCTCCCTCACCGTCAGCCCCTGGCAACATGGGTTGATCCCGGCGAAATGCGGGG
AATCGGTAGCAGTAGGGAGCGAGGGGGGTGATCCGCAGCCAAATCCCCCTCCCTCCACGC
CTTGTCCGCCCGGGACGAGGCACGGAACGCTGGCGGGATGCAGTCCACAGACTACACGGT
GGTGGGTAGCGCTCGCTGCCCAAGATATAGTCGGGTCTGCACCGAAAGGTGCAGGAATCA
CCGCAGATACCGTCGTAGTCCAGACCCTAAATGCTGTCGACCATGGATGGACCGT-AGTC
CATCC------CGACCTGGCCCGAACGCTGT--------------GGAAAACCA--GAGC
ATTTGGATTCTGGGGGGAGTATGGTCGCAAGTCTGAAACTTGTCAGCCCTCGGGTTTCGA
GAGCGGTAAACCCGCTAGCTGGCTGCCGCGTCGCGTGCGGCAGCCGGCAACACCAACCAA
TTGCTGGAACCTCCTAGAGCCCCTTCCCCACCCCCTCCGCGCAAGCAATTGCGGCAGAGC
GACTGCGGAGATGCAGTCAGGTAACAGTGGGAGGGGGCGGCAGTCATTACTGACTGCCAG
CGGAAAATCAGCATCCAAGCCACCACGGGACTTTGCCCAGGGAAAGAGGGTTCCTCTTCC
CAGGGAAAGAGGGTTCCTCTGCCCAGGGAAAGAGGGTTCCTCTGCCCAGGGAAAGAGGGT
TCCTCTGCCCAGGGAAAGAGGGTTCCTCTGCCCAGGGAAAGAGGGTTCCTCTTCCCAGGG
AAAGATGGTTCCTCTTCCCAGGGAAAGAGGGTTCCTCTTCCCAGGGAAAGAGGGTTCCTC
TTCCCAGGGAAAGAGGGTTCCTCTTCCCAGGGAAAGATGGTTCCTCTTCCCAGGGAAAGA
TGGTTCCTCTTCCCAGGGAAAGATGGTTCCTCTTCCCAGGGAAAGATGGTTCCTCTTCCC
AGGGAAAGGGGGTTCCTCTTCCCAGGGAAAGGGGGTTCCTCTTCCCAGGGAAAGGGGGTT
CCTCTTCCCAGGGAAAGGGGGTTCCTCTTCCCAGGGAAAGGGGGTTCCTCTTCCCAGGGA
AAGGGGGTTCCTCTTCCCAGGGAAAGGGGGTTCCTCTTCCCAGGGAAAGGGGGTTCCTCT
TCCCAGGGAAAGAGCGCCCGTGGCGGTGCAGTTCACAGGCCAAATGTTGGTGGGCAGCCG
CGSWRRGCTGCTTGAGATATGGTCGGGCGGCAAGGGAGAGCTTTGCCGGGCAAACCGTAA
AGGAATTGACGGAAGAG-CACACAAGGAGTAAAAGGCATCTGCTCCTCAGAGCTCCGCGG
CAGCGCGGAGCTAGTCTGCAGCGCTCTCTGCAGGCAACACCACCAAACTGCGGGAAAACC
CTCGAGCTCCCCCCTACCGCACTGCAGCCGCGAGGCTTCGGTGCTTCTCCTGAAGCAGGA
GCGGTAACAACGGGTGGGTGCGGGTGATCCGCAGCTAAACCCGCCGGAAGGCGGGTGCAG
TTCACAGACTAGACGGTGGTGGGCGGCGGAAACGATCCCGCTTGCCTAAGATATAGTCGG
GCTGCCGGGAAACCGTGCAGGACAAGCGGGAGCCTGCGGCT-------------------
------------------------------------------------------------
------------------------------------------------------------
------------------------------------------------------------
------------------------------------------------------------
------------------------------------------------------------
------------------------------------------------------------
------------------------------------------------------------
------------------------------------------------------------
------------------------------------------------------------
------------------------------------------------------------
------------------------------------------------------------
------------------------------------------------------------
------------------------------------------------------------
------------------------------------------------------------
------------------------------------------------------------
------------------------------------------------------------
------------------------------------------------------------
------------------------------------------------------------
------------------------------------------------------------
------------------------------------------------------------
------------------------------------------------------------
------------------------------------------------------------
------------------------------------------------------------
------------------------------------------------------------
------------------------------------------------------------
--------------------------------------TAATTTGACTCAACACGGGGAA
ACTTACTAGAGCAAAAGCAGGGGATGATGTACAGTATATCAGTGCTTTACAGA--TTCCT
GCTGTGGTGGTGCATGGTCGT---------------------------------------
------------------------------------------------------------
------------------------------------------------------------
------------------------------------------------------------
------------------------------------------------------------
------------------------------------------------------------
------------------------------------------------------------
------------------------------------------------------------
------------------------------------------------------------
---------TCTTAGTTCGTG---------------------------------------
------------------------------------------------------------
------------------------------------------------------------
------------------------------------------------------------
------------------------------------------------------------
------------------------------------------------------------
------------------------------------------------------------
------------------------------------------------------------
------------------------------------------------------------
------------------------------------------------------------
------------------------------------------------------------
------------------------------------------------------------
------------------------------------------------------------
------------------------------------------------------------
----------------------------------------------
>Licea_variabilis_JX481298
-------------------------------n----------------------------
------------------------------------------------------------
-----------------------------------CGAACGGCTCCGTATATCTGTTGAA
A-CCTGCGGCTTAACCATCAAGGTA-----------------------------------
------------------------------------------------------------
------------------------------------------------------------
------------------------------------------------------TAG-TC
GA-ACAAC-CTAGGTAATTCTT-AGGCTAATGCGAAC-GGTGATATGACGGGGTCGCCAG
TGCAGAGAGGGAAGCTGGCTAACGCCCCTTCCTGATCACCTGCCCGCGCGTAAAGCTAGG
CGATTGTAAATCGTAAAACGGAGAACCGCATCTGCGTTGTGGACTCCTGCCTCCCCAGAG
ACAAGGCTGGCAAAACCGAAACTGGGCGCCTCGATT------------------------
------------------------------------------------------------
------------------------------------------------------------
------------------------------------------------------------
CGTT--TC-CAGG-GCGCTT-CGGTGGAGGCGTGCTTTTGATCTCGACGCAGACCACAAC
CATTTATGAGCTTGTGC-------------------------------------------
-------------------------GAACGT--GCGC---TTACGTCATGGACTTCAGAC
CTATCA-ACT-AAAGGGGATGGTCAAGGCCTCC-TCTGGTTTCAACGGGTACAGAGAATC
AGGGTTCGGTTCTGGAGAGGTAGCCTCAAACATCGCTACTACTTCTAAGGAAGGCAGCAG
GCGCGCAACGTTCCCCATGGGC---------ATGAA--------CCTGAGGACGTGACGG
GATATAGCGATACTGGACCCC-TAAA----GGGCTCGGTAATTGC-AATGGGGTGGGCGT
AAACA-CCCCAAGGTCAAGCGAGTAACGATTGGAGGACAAGTCTGGT-------------
------------------------------------------------------------
------------------------------------------------------------
------------------------------------------------------------
------------------------------------------------------------
------------------------------------------------------------
------------------------------------------------------------
------------------------------------------------------------
------------------------------------------------------------
------------------------------------------------------------
------------------------------------------------------------
------------------------------------------------------------
------------------------------------------------------------
------------------------------------------------------------
------------------------------------------------------------
------------------------------------------------------------
------------------------------------------------------------
------------------------------------------------------------
------------------------------------------------------------
--------------------------------------------------------GCCA
GCACCCGCG---------------------------------------------------
------------------------------------------------------------
------------------------------------------------------------
------------------------------------------------------------
------------------------------------------------------------
------------------------------------------------------------
------------------------------------------------------------
------------------------------------------------------------
------------------------------------------------------------
------------------------------------------------------------
------------------------------------------------------------
------------------------------------------------------------
------------------------------------------------------------
------------------------------------------------------------
------------------------------------------------------------
------------------------------------------------------------
------------------------------------------------------------
------------------------------------------------------------
------------------------------------------------------------
------------------------------------------------------------
--------------------------------------GTAATTCCAGCTCCAATAGCAT
CTAGTTAAGTTGTTGCAGTTAAAACGCTCGTAGTCAAT-GTGGG--CCTTTGGCCTTCCT
AAG---------------------TAGTCGGCGTGGGGGCATGCGCTCTTCTTGGTCGGC
AGCCACCCTCGCAAGGGGGTGGTTGCAGTGCCCCTCCCTTAACTGGGCTGTGGGTCCCTC
CGCAAGGTTGCGGCCAGGATGGAGGATATAAACGCGTCCCTGCGCAGGCGAAGCGGATGT
GCTGGGGGTCCTGGGCGCCTAGGACGAAAACCGGGGCAGGTTGGGTTGTACGCAAGTACC
GCACCTCTGTACGTGTG-------------------------------------------
------------------------------------------------------------
------------------------------------------------------------
------------------------------------------------------------
------------------------------------------------------------
-----------------------------------------------TTAGGTGCACTAT
ACTTTGAA--TAAATTAAAGCGCTCGACGCAGCCCTCTTATCAGGGG-------------
--------------------------------CGGGA-TACTTC-AGCAAAGAATATCAA
AACACGACACGATCGTGGTT----TGTTGGTTACATGGT---------------------
------------------------------------------------------------
-----------------------------------------CCTGTAA-TGATTAATAGG
GGGGATCGGGGTGGGCCACATGCCAGGGGTAGGGGTGAAATCCGTTGATCCTTGGTAGGT
GAACAAGAGCGAAAGCAGCC-TACAAGTACCCTTTCTTTGATCAAGAACGAAAGCCTGGG
GATCGAAGATGAT-----------------------------------------------
------------------------------------------------------------
------------------------------------------------------------
------------------------------------------------------------
------------------------------------------------------------
------------------------------------------------------------
------------------------------------------------------------
------------------------------------------------------------
------------------------------------------------------------
------------------------------------------------------------
------------------------------------------------------------
------------------------------------------------------------
------------------------------------------------------------
------------------------------------------------------------
------------------------------------------------------------
------------------------------------------------------------
------------------------------------------------------------
---CAGATACCATCGTAGTCCAGACCCTAAATGTTGCCGACCATGGATGGGCG-C-AGTC
CATCC------CGACCCAGTCTGGACCTTGT--------------GGGAAACCATGAAGT
GTTTGGGCTCCGGGGGGAGTATGGTCGCAAGACTGAAACT--------------------
------------------------------------------------------------
------------------------------------------------------------
------------------------------------------------------------
------------------------------------------------------------
------------------------------------------------------------
------------------------------------------------------------
------------------------------------------------------------
------------------------------------------------------------
------------------------------------------------------------
------------------------------------------------------------
------------------------------------------------------------
------------------------------------------------------------
------------------------------------------------------------
---------------------------------------------------------TAA
AGGAATTGACGGAAGAG-CACACAAGGAGT------------------------------
------------------------------------------------------------
------------------------------------------------------------
------------------------------------------------------------
------------------------------------------------------------
----------------------------GGAGCCTGCGGCT-------------------
------------------------------------------------------------
------------------------------------------------------------
------------------------------------------------------------
------------------------------------------------------------
------------------------------------------------------------
------------------------------------------------------------
------------------------------------------------------------
------------------------------------------------------------
------------------------------------------------------------
------------------------------------------------------------
------------------------------------------------------------
------------------------------------------------------------
------------------------------------------------------------
------------------------------------------------------------
------------------------------------------------------------
------------------------------------------------------------
------------------------------------------------------------
------------------------------------------------------------
------------------------------------------------------------
------------------------------------------------------------
------------------------------------------------------------
------------------------------------------------------------
------------------------------------------------------------
------------------------------------------------------------
------------------------------------------------------------
--------------------------------------TAATTTGACTCAACACGGGGAA
ACTCACGGGGGCACGAAGGCGAGATGCAGGTCAGGCGAGCAGGCCTTACCTCA--GTCGT
CCAGTGGTGGTGCATGGTCGT---------------------------------------
------------------------------------------------------------
------------------------------------------------------------
------------------------------------------------------------
------------------------------------------------------------
------------------------------------------------------------
------------------------------------------------------------
------------------------------------------------------------
------------------------------------------------------------
---------TCTTAGTTCGTGGA-GTGATTTGTCTGGTCTATTCCGCTAACGAGCGAGAA
CCTGGCTTCTCG-AGTTGGGG--GCTG--GCGCAC----GTGGGG---TGTAAGGGTCTG
CCTGGGGGTGGGGTGGGGGGGGGGTGACCCTCCCCAGCCTCGTTCTCGGGCGGGTTCGAT
A-----------------------------------------------------------
-------------------------------------------------AGCCTCGCTGA
AAACGCGCCTGGCTTC--------------------------------------------
--------------------------------TGGCCCTGA-GGCACCTGCCTT---GAA
AAGAGGTCGG-TAGC--AGGTCAATAACAGGT----------------------------
------------------------------------------------------------
------------------------------------------------------------
------------------------------------------------------------
------------------------------------------------------------
------------------------------------------------------------
------------------------------------------------------------
------------------------------------------------------------
------------------------------------------------------------
------------------------------------------------------------
------------------------------------------------------------
------------------------------------------------------------
-----------------------CAGT-GATGCCCT------------------------
------------------------------------------------------------
------------------------------------------------------------
------------------------------------------------------------
------------------------------------------------------------
------------------------------------------------------------
------------------------------------------------------------
-------------TAGATGC--CCTTGGCCGCACGCGCGCTACAATGGGGGGAA--GAGC
GGGTTG------------------------------------------------------
-CCTGTGCC-------TAACGGCTG-CGGGTAATCCTGGGAAAGCTCTCCAT-GTCTGGG
ATCTAGGCGTGTAAAACGTC--------TTGTCAACAAGGAATTTCTAGTAGGCACA-GG
TCATCAGCCTGTGCCGATTATGTCCCTGCTCT----------------------------
------------------------------------------------------------
------------------------------------------------------------
------------------------------------------------------------
------------------------------------------------------------
------------------------------------------------------------
------------------------------------------------------------
------------------------------------------------------------
------------------------------------------------------------
-------------------------TTGTACACACCGCCCGTCGCTCCTACCGATTGGAT
TGCCTGGTGAGGGGGGGAGATCACAGGCCAGCG---------------------------
------------------------------------------------------------
------------------------------------------------------------
------------------------------------------------------------
------------------------------------------------------------
------------------------------------------------------------
------------------------------------------------------------
------------------------------------------------------------
------------------------------------------------------------
------------------------------------------------------------
------------------------------------------------------------
------------------------------------------------------------
------------------------------------------------------------
------------------------------------------------------------
------------------------------------------------------------
------------------------------------------------------------
------------------------------------------------------------
------------------------------------------------------------
------------------------------------------------------------
------------------------------------------------------------
------------------------------------------------------------
------------------------------------------------------------
------------------------------------------------------------
------------------------------------------------------------
------------------------------------------------------------
------------------------------------------------------------
------------------------------------------------------------
------------------------------------------------------------
------------------------------------------------------------
------------------------------------------------------------
------------------------------------------------------------
------------------------------------------------------------
-----------------CCTTACGGGGCGAACGTCGGACGCCAAGATTGTAGCGACCCGC
CTTAGAGCGTGGCAACGACTATCGGACGCATCAGGGAACCTTC--CCAAATCTTTCGGTC
TAGAGGAA
>Lindbladia_tubulina_JX481299
-------------------------------TATGCTTGTTTCCGAGATT-AAGCCATGC
ATGCTTTTTTGAATAAAC-GTTCT-TTTTGTTCATACCTTGGATAGTGGGC---------
-------------------------GGTGAATCTGCGAAAAGCTCCATAATACTGTTATA
A-CTTTCCCAATTAATCTGTAGGCTTTCTACCAATATAAGTAGAAGTCTTCTCTCTTTTT
GAATCCCTTTTTCTCAAGGGGGTGCCCTTCATTTTGAGAGAAACT---------------
------------------------------------------------------------
------------------------------------------------------TAT-AC
GG-ATATCCGGTGGAAATTCTA-CGGCTAATACGTGC-ACCTTGGTTCTTCACTTTTTTC
TTCCAGTATTTAGTTTTGACCCTCTGCCTTGAACCTATCCTTCGGGGTAACCTTTGCTGA
GACTTTACTTGTATTGGGAGGGGGA--GTGGAAGCCATGAAATTCTTAAAAAATCTCTTG
ATAAAGTTAGAACTCACATCCTTGGCTGGGTGTGGCTTTTGATTTTTGAAGGTGATTCTG
GTTCTTGGTCGACTAGGAAATACTCTTGCTTTAGCTTTAATTTCCTT-CGGGGGTTTTTG
CTATTCAAGAGTCT----------------------------------------------
------------------------------------------------------------
------------------------------------------------------------
------------------------------------------------------------
-------------------------CTTTCT--TAGT---AAGTTGGAAAGGTTTCAGAT
CTATCATACT-TGTGAACAGGGTATTGACCTGC-TCAGGTTATAACAGATACGGGGAATT
AGGGTTTGATTCCGGAGAGGAAGCCTAAAAAACCGCTTCCACTTCCAAGGAAGGCAGCAG
GCGCGTAACGTTTCCAATGACTA--------AGTT---------GTTGAGAACGCTAGGA
AACATATGGGACTAGGCT----ATTTA----GTCTAGAATACCCG-AATGAGGGCAATCC
AAACA-ACTCACCT-------AGTAACAATTAGTGGGAAAGTCTGGT-------------
------------------------------------------------------------
------------------------------------------------------------
------------------------------------------------------------
------------------------------------------------------------
------------------------------------------------------------
------------------------------------------------------------
------------------------------------------------------------
------------------------------------------------------------
------------------------------------------------------------
------------------------------------------------------------
------------------------------------------------------------
------------------------------------------------------------
------------------------------------------------------------
------------------------------------------------------------
------------------------------------------------------------
------------------------------------------------------------
------------------------------------------------------------
------------------------------------------------------------
--------------------------------------------------------GCCA
GCATCCGCG---------------------------------------------------
------------------------------------------------------------
------------------------------------------------------------
------------------------------------------------------------
------------------------------------------------------------
------------------------------------------------------------
------------------------------------------------------------
------------------------------------------------------------
------------------------------------------------------------
------------------------------------------------------------
------------------------------------------------------------
------------------------------------------------------------
------------------------------------------------------------
------------------------------------------------------------
------------------------------------------------------------
------------------------------------------------------------
------------------------------------------------------------
------------------------------------------------------------
------------------------------------------------------------
------------------------------------------------------------
--------------------------------------GTAATTCCAGCACTAATAGCAT
ATTATTTTACTGTTGCAGTTGAAACATTCGTAGTCGAA-CTTGG--GTTTTTTATGCACT
TGGAGAGAAGATTGTGCTCCTGTTTGTTCTTCTGGTTTAGAAGTTCTTATCACCGGGATT
CTTCCACAGGTTTAATTGAAATTTATTTCTTTTTTTCTCTGATTGGCAATCTTTTGGGGG
TAGGATACAACTTTATCAGCTCTTGAGCTTATAGTCACAGTCCGATTCAAAGAGT-GTTG
AGAAAGCCAATCACTTTCTGGACCGTATCAACTTCCTTTCATTAGGCAGGTTGGTC----
------------------------------------------------------------
------------------------------------------------------------
------------------------------------------------------------
------------------------------------------------------------
------------------------------------------------------------
----------------------------------------------TCTTCAGATAACTT
ACCTTGAG--ACAATAAACTGGCTCAAAGTAGGTCTTCC----TTTCG------------
--------------------------TGACA-TTGAA-TTCACT-AGCATGGGATAATTT
ATCTTTCTGATA------------AGTTGGTTCTCTGTCAGA------------------
------------------------------------------------------------
-----------------------------------------AGGAAGG-TGGTTAAAAGG
GGTTGAGGGGGTCAGCCAAGCTGTGGGGCGAGGGGTGAAATCCGTTGACCCTCACAGATT
GACCATGAGCGAAAGCTGCT-GGCTACGATATCTCTTTTGATCAAGAATGGGAGTGGGGG
GATCGAAAATGAT-----------------------------------------------
------------------------------------------------------------
------------------------------------------------------------
------------------------------------------------------------
------------------------------------------------------------
------------------------------------------------------------
------------------------------------------------------------
------------------------------------------------------------
------------------------------------------------------------
------------------------------------------------------------
------------------------------------------------------------
------------------------------------------------------------
------------------------------------------------------------
------------------------------------------------------------
------------------------------------------------------------
------------------------------------------------------------
------------------------------------------------------------
---TAGATACCGTTGTAGTCCCCACAGCAAAAGTTGTCAACCACCCGTGGGATGACAATC
TA-CC------AGACTTCTTCCATATGTTAA--------------TTAAAGTTACTAAGT
---TGA-CTCTGGGGGGAGTATGGTCGCAAGTCTGAAACT--------------------
------------------------------------------------------------
------------------------------------------------------------
------------------------------------------------------------
------------------------------------------------------------
------------------------------------------------------------
------------------------------------------------------------
------------------------------------------------------------
------------------------------------------------------------
------------------------------------------------------------
------------------------------------------------------------
------------------------------------------------------------
------------------------------------------------------------
------------------------------------------------------------
---------------------------------------------------------TAA
AGGAATTGACGGAGGAG-CACACAAGGAGT------------------------------
------------------------------------------------------------
------------------------------------------------------------
------------------------------------------------------------
------------------------------------------------------------
----------------------------GGAACCTGCGGCTTAACTTATTAGGCCAAGTG
GGCAAGTAATTGTCTGCTAGTCCATATATTTTCCATTTACTTCAGTGGAGGAAGTAAAAA
AGGGGATGTATGGGCGACACCATCAAATTGCGGGGAGTCCCTTAGAGCTCAATCTACTAC
CTAAGCGTTGAAAAGCGAAAAAAACAGGACCGTTACTATTCCTTAGTCTGGAAGAGGTAC
CTGCTTAGGAACCTGGTGTAGTGGCCAGGGTATAGTAAAAATGATTGAGATTGGGTAATC
CGCAGCCAAGCTCGTGTAAAGAGTGAAAATGATACTCAAAATCTTAGGTTTTTCTATTGG
ACAAAAGGGCTTTTTTTTTCCATTGGTTTTTCCTTGGTTCCTTCCTTCCCCTCAGGAACC
TTAGGAAAAAGGAAAGGAAAAAAAAAGGGGAAAATGGTTTTTCCTAGGGTTTTCCTTGGG
AAAAAGATTTTTTTCCGGCCCATTGCCAATGGGAAACAACCCCGGGGCCATTTCCCAAAT
AAATGGTGGGGGAACTTCCAAAAAGTTAAGTTTTTTGGCGTACGGGAACCTAACTTTCTG
GTTGGTTAAAAATTTAGCCAACTTCCCCTGAAAGGGGCTGGCCAAAAAGGGAACCTTAGT
TCCCAAAGTTGCGGGGACTTTCTGGAAGGATGGCTTTGTTTCCTCCTTGGGTGGAAAAAA
TTACCAATTCCCGGGCCCAGACTTGTAATAAGTTTTTTCCAAGGCTTAAAGGTTGGTTTC
CTGGGCCTTTTTCCTGGGCAAGGGGGAACCTAGGGTTGGGAAAGCCAAATTTTAAGGTTT
TTTTTTTTTTTCTTTTCTTTTCTGTTTCTCTTTAGTGGAAAGAGAGCCAGGAGGGTTAAG
AAAAAGAAGGGAAAACAGAGTAATTATTTCAGAAAGTTTAGACAAACTG-----------
------------------------------------------------------------
------------------------------------------------------------
------------------------------------------------------------
------------------------------------------------------------
------------------------------------------------------------
------------------------------------------------------------
------------------------------------------------------------
------------------------------------------------------------
------------------------------------------------------------
------------------------------------------------------------
--------------------------------------TAATTTGACTCAACACGGGGAA
TCTTACGGAGATCACAGAAGA-TATGATTGACACAA-TAAAGTTGTTTCTTGAA-TTCTT
CCATCGGTGGTGCATGGCCGT---------------------------------------
------------------------------------------------------------
------------------------------------------------------------
------------------------------------------------------------
------------------------------------------------------------
------------------------------------------------------------
------------------------------------------------------------
------------------------------------------------------------
------------------------------------------------------------
---------TCTTAGTTCGTGTA-GTGGTATGTCTGGTCAACTCCGCTAACGAGCAAGA-
CATAAGACTTTCTCATTAGGT--TCTGGACGATAG----GGAGCATTTGAGTAGAGTATT
TGAGTAGACTACCAGTGCCTTTTAAAGGGTAGGAATCATTTCCTTCGGGATCTTTTTCTC
TCCCTTGATTGGTTACTGGATGCCTAGTATATTCAGTATTTTACTCTTTTGCTGTTCAGT
ACT---------------------------------------------------------
------------------------------------------------------------
------------------------------CTAGTCTGAGA-GTGACAAACGTT---TAT
AAGCCGTTGG-AAGCATTATGCTATAACAGGT----------------------------
------------------------------------------------------------
------------------------------------------------------------
------------------------------------------------------------
------------------------------------------------------------
------------------------------------------------------------
------------------------------------------------------------
------------------------------------------------------------
------------------------------------------------------------
------------------------------------------------------------
------------------------------------------------------------
------------------------------------------------------------
-----------------------CAGT-GATGCCCT------------------------
------------------------------------------------------------
------------------------------------------------------------
------------------------------------------------------------
------------------------------------------------------------
------------------------------------------------------------
------------------------------------------------------------
-------------AAGATAT--CTCCGGCTGCACGCGCGTTACTTTAGTATGAT--TAGC
TAGAC-------------------------------------------------------
-CACGGCAA-------GAGATTGCT-TGTGTAATCTAGAATTCAT-CACTAA-GGTTAGG
ATTG--CTTTGTTCCACTCAAA------CCATGAATATGGAATTTCTAGTAAGCGCTAGT
TCACAAAACTGCGCTGACTTTGTCCCTGCTCT----------------------------
------------------------------------------------------------
------------------------------------------------------------
------------------------------------------------------------
------------------------------------------------------------
------------------------------------------------------------
------------------------------------------------------------
------------------------------------------------------------
------------------------------------------------------------
-------------------------TTGTACACACCGCCCGTCGCTCCTACCGAT-GAGT
GGCTTGCTAAAGACACCGGAGAAGAATTAGAGA---------------------------
------------------------------------------------------------
------------------------------------------------------------
------------------------------------------------------------
------------------------------------------------------------
------------------------------------------------------------
------------------------------------------------------------
------------------------------------------------------------
------------------------------------------------------------
------------------------------------------------------------
------------------------------------------------------------
------------------------------------------------------------
------------------------------------------------------------
------------------------------------------------------------
------------------------------------------------------------
------------------------------------------------------------
------------------------------------------------------------
------------------------------------------------------------
------------------------------------------------------------
------------------------------------------------------------
------------------------------------------------------------
------------------------------------------------------------
------------------------------------------------------------
------------------------------------------------------------
------------------------------------------------------------
------------------------------------------------------------
------------------------------------------------------------
------------------------------------------------------------
------------------------------------------------------------
------------------------------------------------------------
------------------------------------------------------------
------------------------------------------------------------
------------------------------AGACT-------AGAAAAAAAGCTTGCTTT
CTTTCT-------GGAGCACCCTCTACGTTTTTTTGAAGGTTT--CTGGACCAAGACACT
TAGAGGAAGGAGAAGTCGTAACAAGGTAGCTGTAGGTGAACCTGCAGAAGGATC
>Lindbladia_tubulina_FJ810500
TCGACAACCTGGTTGATCCTGCCAGTAT-GATATGCTTGTTTCCGAGATT-AAGCCATGC
ATGCTTTCTTGAATAAAC-GTTCTAATTTATTCAAACCTTGGATAGTGGAC---------
-------------------------GGTGAATCTGCGAAAAGCTCCATAATACTGTTATA
A-CTCTCCCAATTAAACGTAGACTTCTACCAATATAAGTAGC-AAGTCT--TCCTTCTTT
TGATCCCCTTT-CTCAAAGAGGCTCTCAATTGGATG-GA-AAACT---------------
------------------------------------------------------------
------------------------------------------------------TAT-AC
GG-ATATCCGGTGGAAATTCTA-CGGCTAATACGTGC-TCCTTGGTTCTTCATTTCATTC
TTAGTACTAGTAGGGCCCTTTAA----CTTGAA--TATCCTTCGGGGTACTCATTGTTTC
TTGTCTCTATTACTATTTGGGGGTGGGGTGGAAGCCATGAAATTCTTTAAAAATCTCTTG
ATAA-GTTCGAACTCATACTCTTGGTTGAGTATGGCTTTTGATTTTTCAAGGTGATTCTG
GTTCTTGGTCGACTGAGAAATACTCTTGCTTTAGTAGTAATTCCTTAACTGGTCTAACTG
CTATTCAAGAGCCT----------------------------------------------
------------------------------------------------------------
------------------------------------------------------------
------------------------------------------------------------
-------------------------CTTTCT--TAGT---AAGTTGGAGAGGTTTCAGAT
CTATCATACT-AGTGAACAGGGTATTGACCTGC-TCAGGTTATAACAGATACGGGGAATT
AGGGTTTGATTCCGGAGAGGAAGCCTAAAAAACCGCTTCCACTTCCAAGGAAGGCAGCAG
GCGCGTAACGTTTCCAATGACTA--------AGTTT--------GTTGAGAACGTTAGGA
AACATATGGGACTAGGCT----ATTTA----GTCTAGAATACCCG-AATGAGGGCAATCC
AAACA-ACTCACCT-------AGTAACAATTAGTGGGAAAGTCTGGT-------------
------------------------------------------------------------
------------------------------------------------------------
------------------------------------------------------------
------------------------------------------------------------
------------------------------------------------------------
------------------------------------------------------------
------------------------------------------------------------
------------------------------------------------------------
------------------------------------------------------------
------------------------------------------------------------
------------------------------------------------------------
------------------------------------------------------------
------------------------------------------------------------
------------------------------------------------------------
------------------------------------------------------------
------------------------------------------------------------
------------------------------------------------------------
------------------------------------------------------------
--------------------------------------------------------GCCA
GCATCCGCG---------------------------------------------------
------------------------------------------------------------
------------------------------------------------------------
------------------------------------------------------------
------------------------------------------------------------
------------------------------------------------------------
------------------------------------------------------------
------------------------------------------------------------
------------------------------------------------------------
------------------------------------------------------------
------------------------------------------------------------
------------------------------------------------------------
------------------------------------------------------------
------------------------------------------------------------
------------------------------------------------------------
------------------------------------------------------------
------------------------------------------------------------
------------------------------------------------------------
------------------------------------------------------------
------------------------------------------------------------
--------------------------------------GTAATTCCAGCACTAATAGCAT
ATTATTTTGCTGTTGCAGTTGAAACATTCGTAGTCGAA-CTTTG--GTTTTTTATGCACT
CGGAGAGAAGATTGTGCTCTTATCTGTTTCCTTCAGTCTGAGAAAATAGGTCTTTCACTG
GGTTTCCTGGTGGGTTAGAAGAAATTTATTTCTTCTTTCTTTCCACTTGTTAGCCCAAAG
GCTAGA-CTTTGACTCTTACTCAAGAGCTTATAATCACATTCCGATTCAAAGAGTTGTTG
AGAAAGCCAATCACTGTCTGGACTAG-CCAACTTCCTTTCACTAGGCAGGTTGGTT----
------------------------------------------------------------
------------------------------------------------------------
------------------------------------------------------------
------------------------------------------------------------
------------------------------------------------------------
----------------------------------------------ACTTCAGATAACTT
ACCTTGAG--ACAATAAACTGGCTCAAAGTAAGTCTTCC----TTTCG------------
--------------------------TGACA-TTGAA-TTCACT-AGCATGGGATAATTT
ATCTTTCTGATA------------AGTTGGTTCTCTGTCAGA------------------
------------------------------------------------------------
-----------------------------------------GGGAAGG-TGGTTAAAAGG
GGTAGAGGGGGTCAGCCAAGCTATGGGGCGAGGGGTGAAATCCGTTGACCCTCATAGATT
GACCACGAGCGAAAGCGGCT-GGCTACGATATCTCTTTTGATCAAGAATGGGAGTGGGGG
GATCGAAAATGAT-----------------------------------------------
------------------------------------------------------------
------------------------------------------------------------
------------------------------------------------------------
------------------------------------------------------------
------------------------------------------------------------
------------------------------------------------------------
------------------------------------------------------------
------------------------------------------------------------
------------------------------------------------------------
------------------------------------------------------------
------------------------------------------------------------
------------------------------------------------------------
------------------------------------------------------------
------------------------------------------------------------
------------------------------------------------------------
------------------------------------------------------------
---TAGATACCGTTGTAGTCCCCACAGCAAAAGTTGTCAACCACCCGTGGGATGACAATC
TA-CC------AGACTTCTTCCATATGTCAA--------------TAAAAGTTACTAAGT
---TGA-CTCTGGGGGGAGTATGGTCGCAAGTCTGAAACT--------------------
------------------------------------------------------------
------------------------------------------------------------
------------------------------------------------------------
------------------------------------------------------------
------------------------------------------------------------
------------------------------------------------------------
------------------------------------------------------------
------------------------------------------------------------
------------------------------------------------------------
------------------------------------------------------------
------------------------------------------------------------
------------------------------------------------------------
------------------------------------------------------------
---------------------------------------------------------TAA
AGGAATTGACGGAGGAG-CACACAAGGAGT------------------------------
------------------------------------------------------------
------------------------------------------------------------
------------------------------------------------------------
------------------------------------------------------------
----------------------------GGAACCTGCGGCT-------------------
------------------------------------------------------------
------------------------------------------------------------
------------------------------------------------------------
------------------------------------------------------------
------------------------------------------------------------
------------------------------------------------------------
------------------------------------------------------------
------------------------------------------------------------
------------------------------------------------------------
------------------------------------------------------------
------------------------------------------------------------
------------------------------------------------------------
------------------------------------------------------------
------------------------------------------------------------
------------------------------------------------------------
------------------------------------------------------------
------------------------------------------------------------
------------------------------------------------------------
------------------------------------------------------------
------------------------------------------------------------
------------------------------------------------------------
------------------------------------------------------------
------------------------------------------------------------
------------------------------------------------------------
------------------------------------------------------------
--------------------------------------TAATTTGACTCAACACGGGGAA
TCTTACGGAGATCAAAGGAGG-TATGATAGACACAA-TAAAGTTGTTTCTTGAC-TTCTT
CCATCGGTGGTGCATGGCCGT---------------------------------------
------------------------------------------------------------
------------------------------------------------------------
------------------------------------------------------------
------------------------------------------------------------
------------------------------------------------------------
------------------------------------------------------------
------------------------------------------------------------
------------------------------------------------------------
---------TCTTAGTTCGTGTA-GTGGTATGTCTGGTCAACTCCGCTAACGAGCAAGA-
CGCAAAACTTTCTCATTAGGT--TCTGGATG-TCG----AAAGCATTTGAGTGGGTTATC
TCTGTAAGACTACCAATCTCCTTCTATTAATAGA---CTTTTCTCCGGGAACTTCT----
AGTCTTAGTTGGAGTTTGGAATCCTAGCTTATTCAGTAATTTGCTCAAGTGCTATTCAGG
ACT---------------------------------------------------------
------------------------------------------------------------
------------------------------CTAGTCTGAGA-GTGACAAACGAT---TTA
AAACCGTTGG-AAGTATTGTGCTATAACAGGT----------------------------
------------------------------------------------------------
------------------------------------------------------------
------------------------------------------------------------
------------------------------------------------------------
------------------------------------------------------------
------------------------------------------------------------
------------------------------------------------------------
------------------------------------------------------------
------------------------------------------------------------
------------------------------------------------------------
------------------------------------------------------------
-----------------------CAGT-GATGCCCT------------------------
------------------------------------------------------------
------------------------------------------------------------
------------------------------------------------------------
------------------------------------------------------------
------------------------------------------------------------
------------------------------------------------------------
[truncated: 291,773 more chars]
