# Supplementary material for: Two-Gene Phylogeny of Bright-Spored Myxomycetes (Slime Moulds, Superorder Lucisporidia)
Source: PLoS One. 2013 May 7;8(5):e62586. doi: 10.1371/journal.pone.0062586 (PMC3646832; doi:10.1371/journal.pone.0062586)
Supplement: Supporting Information S3 — EF-1α alignment (amino-acids) in fasta format of the 41 sequences used in Fig. S2. (FSA) [file pone.0062586.s009.fsa]

>Alignment_1140
------------------------------------------------------------
NNNNNNNNNNNNNNNNNNNNNNNNNNNNNNNNNNNNNNNNNNNNNNNNNNNNNNNNNNNN
NNNNNNNNNNNNNNNNNNNNNNNNNNNNNNNNNNNNNNNNNNNNNNNNNNNNNNNNNNNN
NNNNNNNNNNNNNNNNNNNNNNNNNNNNNNNNNNNNNNNNNNNNNNNNNNNNNNNNNNNN
NNNNNNNNNNNNNNN---------------------------------------------
------------------------------------------------------------
------------------------------------------------------NNNNNN
NNNNNNNNNNNNNNNNNNNNNNNNNNNNNNNNNNNNNNN---------------------
------------------------------------------------------------
------------------------------------------------------------
------------------------------------------------------------
------------------------------------------------------------
------------------------------------------------------------
------------------------------------------------------------
------------------------------------------------------------
------------------------------------------------------------
------------------------------------------------------------
------------------------------------------------------------
------------------------------------------------------------
------------------------------------------NNNNNNNNNNNNNNNNNN
NNNNNNNNNNNNNNNNNNN-----------------------------------------
------------------------------------------------------------
----------------------------------------------NNNNNNNNNNNNNN
NNNNNNNNNNNNNNNNNNNNNNNNNNNNNNNNNNNNNNNNNNNNNNNNNNNNNNNNNNNN
NNNNNNNNNNNNNNNNNNNNNNNNNNNNNNNNNNNNNNNNNNNNNNNNNNNNNNNNNNNN
NNNNNNNNNNNNNNNNNNNNNNNNNNNNNNNNNNNNNNNNNNNNNNNNNNNNNNNNNNNN
NNNNNNNNNNNNNNNNNNNNNNNNNNNNNNNNNNNNNNNNNNNNNNNNNNNNNNNNNNNN
NNNNNNNNNNNNNNNNNNNNNNNNNNNNNNNNNNNNNNNNNNNNNNNNNNNNNNNNN---
------------------------------------------------------------
------------------------------------------------------------
---------------------NNNNNNNNNNNNNNNNNNNNNNNNNNNNNNNNNNNNNNN
NNNNNNNNNNNNNNNNNNNNNNNNN-----------------------------------
------------------------------------------------------------
-------------------NNNNNNNNNNNNNNNNNNNNNNNNNNNNNNNNNNNNNNNNN
NNNNNNNNNNNNNNNNNNNNNNNNNNNNNNNNNNNNNNNNNNNNNNNNNNNNNNNNNNNN
NNNNNNNNNNNNNNNNNNNNNNNNNNNNNNNNNNNNNNNNNNNNNNNNNNNNNNNNNNNN
NNNNNNNNNNNNNNNNNNNNN---------------------------------------
------------------------------------------------------------
------------------------------NNNNNNNNNNNNNNNNNNNNNNNNNNNNNN
NNNNNNNNNNNNNNNNNNNNNNNNNNNNNNNNNNNNNNNNNNNNNNNNNNNNNNNNNNNN
NNNNNNNNNNNN------------------------------------------------
------------------------------------------------------------
------------------------------------------------------------
------------------------------------------------------------
---------------------------------------------------NNNNNNNNN
NNNNNNNNNNNNNNNNNNNNNNNNNNNNNNNNNNNNNNNNNNNNNNNNNNNNNNNNNNNN
NNNNNNNNN---------------------------------------------------
---------------------------------------NNNNNNNNNNNNNNNNNNNNN
NNNNNNNNNNNNNNNNNNNNNNNNNNNNNNNNNNNNNNNNNNNNNNNNNNNNNNNNNNNN
NNNNNNNNNNNNNNNNNnnnnnnnnnnnnnnnnnnnnnnnnnnnn---------------
--------------
>Arcyria_cinerea_JX481317
---------------------------------------------------CACTTGATC
TACAAGTGCGGTGGTATTGATAAGAGAACCATCGAGAAGTTCGAGAAAGAGGCCTCTGAG
ATGGGCAAGGGTTCCTTCAAGTACGCCTGGGTGTTGGATAAACTAAAGGCTGAACGTGAG
CGTGGTATTACCATCGACATTGCCTTGTGGAAGTTCGAGACCAACAAGTACTACTTCACC
ATCATTGACGCCCCA---------------------------------------------
------------------------------------------------------------
------------------------------------------------------GGACAC
CGTGACTTTATCAAGAACATGATTACTGGTACCTCCCAAGTAAGTATCTCTCGCTTTCCA
CATTTGAAGTGTGGGTGTGGGTGTGTGTGCCGTGGGGAACACCCATCTCTGTGCATTTGC
TGTAGCTTGGTTACTTACGCTGGTTCTTG-------------------------------
------------------------------------------------------------
------------------------------------------------------------
------------------------------------------------------------
------------------------------------------------------------
------------------------------------------------------------
------------------------------------------------------------
------------------------------------------------------------
------------------------------------------------------------
------------------------------------------------------------
---------------------------------------CAGGCTGATGCAGCTGTGTTA
GTCATTGCCTCCCCCACTG-----------------------------------------
------------------------------------------------------------
----------------------------------------------GTGAGTTCGAGGCT
GGTATCGCCAAGAACGGACAGACCCGTGAGCACGCCCTTCTTGCCTACACACTCGGTGTG
AAGCAAATGATCGTTGCTATCAACAAGATGGACGACAAGTCAGTCAACTGGGCACAATCC
CGTTATGATGAAATCGTTAAGGAGGTGTCCTCTTTCGTCAAGAAGATCGGATACAACCCC
GAGAAGATCCCCTTCGTCCCCATCTCTGGATGGCACGGAGACAACATGTTGGAGAAGTCC
GCCAACCTCCCCTGGTACAAGGGCCCCACATTGCTCGAGGCTCTCGACTCTGTCCAA---
------------------------------------------------------------
------------------------------------------------------------
---------------------GAGCCCAAACGCCCAACTGAGAAGCCCCTCCGTATCCCC
TTACAAGACGTGTACAAGATTGGTG-----------------------------------
------------------------------------------------------------
-------------------GTATCGGAACAGTACCCGTAGGTCGTGTTGAGACTGGTATC
CTCAAGCCAGGCATGAACGTTACCTTCTCCCCCGCTGGTTTAACCACTGAAGTCAAGTCT
GTCGAGATGCACCACGTAGCCCTCCCTGAGGCCGTCCCAGGAGACAACGTCGGCTTCAAC
GTCAAGAACTTGTCTGTCAAG---------------------------------------
------------------------------------------------------------
------------------------------GATATTCGCCGTGGTATGGTTGCTGGTGAT
GCCAAGAACGATCCCCCTCAAGAGACTGAGAACTTCACTGCCCAGGTTATCATCCTCAAC
CACCCTGGTCAG------------------------------------------------
------------------------------------------------------------
------------------------------------------------------------
------------------------------------------------------------
---------------------------------------------------ATCCATGCC
GGATACGCCCCAGTGCTCGATTGCCACACCGCCCACATTGCCTGCAAGTTCACTGAGCTC
CTTTCCAAG---------------------------------------------------
---------------------------------------GTAGACAGACGTACTGGTCAA
GCTACAGAGGATGTCCCCAAGAACATCAAGAACGGTGATGCCGCTATGGTCCTCCTCACC
CCCTCCAAGCCCATGTGTGTTGAGCCCTTCACTGACTACCCCCCTCTCGGTCGTTTTGCC
GTCCGTGATATG
>Arcyria_denudata_AY643820
------------------------------------------------------------
TACAAGTGCGGTGGTATTGATAAGAGGACAATCGAGAAGTTCGAGAAGGAGGCCTCTGAA
ATGGGCAAGGGTTCCTTCAAATACGCTTGGGTGTTGGACAAACTCAAGGCCGAGCGTGAA
CGTGGTATTACCATCGACATTGCATTGTGGAAGTTCGAGACCAACAAGTACTATTTCACC
ATTATTGATGCCCCA---------------------------------------------
------------------------------------------------------------
------------------------------------------------------GGACAT
CGTGATTTCATCAAGAACATGATTACTGGTACCTCCCAAGTAAGTATAACCCACTCTCAC
TTGTATTATAATAACCCGCTTTGGTTGTTGCTTGCGCTATTGTTTGTTTGTTCACGCACT
AAATTCTATTT-------------------------------------------------
------------------------------------------------------------
------------------------------------------------------------
------------------------------------------------------------
------------------------------------------------------------
------------------------------------------------------------
------------------------------------------------------------
------------------------------------------------------------
------------------------------------------------------------
------------------------------------------------------------
---------------------------------------CAGGCTGATGCTGCTGTTTTG
GTTATTGCCTCCCCTACTG-----------------------------------------
------------------------------------------------------------
----------------------------------------------GTGAGTTCGAGGCC
GGTATTGCCAAGAGCGGACAGACCCGTGAGCACGCACTCCTTGCCTACACACTCGGTGTG
AAGCAGATGATCGTTGCTATCAACAAGATGGACGACAAATCCGTCAACTGGAGCCAAGCA
CGTTATGATGAGATCGTCAAGGAGGTCTCTTCTTTCGTCAAGAAGATCGGTTACAACCCT
GAGAAGATCCCCTTCGTCCCCATCTCTGGTTGGAACGGAGACAACATGTTGGAGAAATCC
GCCAACCTCCCATGGTACAAGGGTCCCACTTTGCTCGAGGCCCTCGACGCTGTTCAA---
------------------------------------------------------------
------------------------------------------------------------
---------------------GAGCCCAAGAGACCGACCGAGAAGCCCCTCCGTGTTCCC
CTACAGGATGTGTACAAGATCGGTG-----------------------------------
------------------------------------------------------------
-------------------GTATCGGAACGGTTCCCGTCGGACGTGTTGAGACTGGTATC
CTCAAGCCAGGCATGAACGTCACCTTCGCTCCCGCTGGCTTGACCACTGAAGTCAAGTCC
GTCGAGATGCACCACGTCGCTCTTACCGAGGCCGTCCCAGGAGACAACGTCGGTTTCAAC
GTCAAGAACTTGTCCGTGAAG---------------------------------------
------------------------------------------------------------
------------------------------GATATTCGTCGTGGTATGGTCGCTGGTGAC
TCCAAGAACGATCCCCCTCAAGAGACTGAGACCTTCAATGCCCAAGTCATCATCTTGAAC
CACCCCGGACAG------------------------------------------------
------------------------------------------------------------
------------------------------------------------------------
------------------------------------------------------------
---------------------------------------------------ATCCACGCT
GGTTACGCCCCAGTGCTCGATTGCCACACTGCCCACATCGCATGTAAGTTCACTGAGCTG
CTCTCCAAG---------------------------------------------------
---------------------------------------GTCAATCGTCGTTCTGGTGCT
GACACCGAAGGTGCTCCCAAGAACCTCAAGAACGGAGATGCTGCCATTGTAAGACTTATG
CCCTCCAAGCCCATGTGCGTTGAGCCTTTCACTGAGTACCCTCCTCTGGGTCGTTTTGCC
GTCCGTGATATGAGACAAACTGTTGC
>Arcyria_globosa_JX481318
------------------------------------------------------------
n-----------------------------ATTGAGAAGTTCGAGAAGGAGGCCTCTGAG
ATGGGCAAGGGATCCTTCAAATATGCATGGGTGTTGGATAAACTCAAGGCCGAGCGTGAG
CGTGGTATTACCATCGATATTGCCTTGTGGAAGTTCGAGACCAACAAGTACTACTTCACC
ATCATTGATGCCCCT---------------------------------------------
------------------------------------------------------------
------------------------------------------------------GGACAT
CGCGACTTCATCAAGAACATGATTACCGGAACCTCTCAAGTAAGTAATATATGCAAAGTG
TTTGTGACTCTTACGCAATACTAACCTACTGCTCTT------------------------
------------------------------------------------------------
------------------------------------------------------------
------------------------------------------------------------
------------------------------------------------------------
------------------------------------------------------------
------------------------------------------------------------
------------------------------------------------------------
------------------------------------------------------------
------------------------------------------------------------
------------------------------------------------------------
---------------------------------------CAGGCTGATGCAGCTGTGTTG
GTCATTGCCTCCCCCACTG-----------------------------------------
------------------------------------------------------------
----------------------------------------------GAGAGTTCGAGGCT
GGTATCGCCAAGAGCGGACAAACCCGTGAGCACGCACTTCTCGCCTTCACTTTGGGTGTC
AGACAATTGATTGTCGCCATCAACAAGATGGATGAGAAATCCACCAACTGGAGCCAAGCT
CGTTATGACGAAATCGTCAAGGAAACCTCTTCTTTCGTCAAGAAGATCGGATACAACCCT
GAGAAGATCCCCTTCGTCCCCATTTCTGGATGGAACGGAGACAACATGTTGGAGAAGTCC
ACCAACCTCCCATGGTACAAGGGCCCCACTTTACTCGAGGCCCTCGACGCTGTCCAA---
------------------------------------------------------------
------------------------------------------------------------
---------------------GAGCCCAAGAGACCAACCGACAAGCCCCTCCGTGTTCCC
CTCCAGGATGTCTACAAGATCGGAG-----------------------------------
------------------------------------------------------------
-------------------GTATTGGAACTGTTCCCGTCGGTCGTGTTGAGACTGGTATC
CTCAAGCCAGGAATGAACGTTACCTTCGCCCCTGCTGCCCTCACCACTGAGGTCAAGTCC
GTCGAAATGCATCACGTTGCCCTCCCTGAGGCCGTTCCCGGAGACAACGTCGGTTTCAAC
GTTAAGAACTTGTCTGTCAAG---------------------------------------
------------------------------------------------------------
------------------------------GATATTCGCCGTGGTATGGTTGCTGGTGAT
GCCAAGAACGATCCTCCTCAAGAGACTGCCACCTTCACCGCCCAAGTTATCGTCCTCAAC
CACCCTGGACAA------------------------------------------------
------------------------------------------------------------
------------------------------------------------------------
------------------------------------------------------------
---------------------------------------------------ATCCACGCT
GGTTATGCTCCAGTGCTCGATTGCCACACTGCCCACATTGCCTGCAAGTTCACCGAGCTC
ATCTCCAAG---------------------------------------------------
---------------------------------------GTCGACAGACGTACTGGTGCT
GAGACCGAGGGTGCCCCCAAGAACATCAAGAACGGTGATGCTGCCATGGTTCTCCTCACC
CCATCCAAGCCCATGTGCG-------------------------n--
>Arcyria_stipata_EF513183
-CAGAGCTCGTTTATGGTCATGTAGACGCCGGTAAGTCCACCACTACCGGTCACTTGATT
TACAAGTGCGGTGGTATTGATAAGAGAACCATCGAGAAGTTCGAGAAAGAGGCCTCTGAA
ATGGGCAAGGGTTCCTTCAAATACGCCTGGGTGTTGGATAAACTCAAGGCTGAGCGTGAA
CGTGGAATCACCATTGACATTGCATTGTGGAAGTTCGAGACCAACAAGTACTATTTCACC
ATTATTGATGCCCCA---------------------------------------------
------------------------------------------------------------
------------------------------------------------------GGACAT
CGTGATTTCATCAAGAACATGATTACTGGTACTTCCCAAGTAAGTATAACTCGCCCTCCA
AGTATTATATCTGCTACTTCTTACGCGATTTTTTGGACCACTCACTAACTTATTCTCTTC
------------------------------------------------------------
------------------------------------------------------------
------------------------------------------------------------
------------------------------------------------------------
------------------------------------------------------------
------------------------------------------------------------
------------------------------------------------------------
------------------------------------------------------------
------------------------------------------------------------
------------------------------------------------------------
---------------------------------------CAGGCTGATGCTGCTGTTTTG
GTTATTGCCTCACCCACTG-----------------------------------------
------------------------------------------------------------
----------------------------------------------GTGAGTTCGAGGCT
GGTATTGCCAAGAGCGGACAAACCCGTGAGCACGCCCTCCTTGCCTACACACTCGGTGTG
AAGCAGATGATCGTAGCCATTAACAAGATGGACGACAAATCCGTCAACTGGGGACAAGCC
CGTTATGATGAGATCGTCAAGGAGGTCTCCTCTTTCGTGAAGAAGATCGGTTATAACCCT
GAGAAGATTCCCTTCGTCCCCATCTCTGGTTGGAACGGAGATAACATGTTGGAGAAATCC
GCCAACCTCCCATGGTACAAGGGTCCCACTTTGCTCGAGGCCCTCGACGCTGTTCAA---
------------------------------------------------------------
------------------------------------------------------------
---------------------GAGCCCAAAAGACCAACCGATAAGCCCCTTCGTATCCCC
CTTCAAGATGTGTACAAGATTGGAG-----------------------------------
------------------------------------------------------------
-------------------GTATTGGTACTGTCCCAGTAGGTCGTGTTGAGACTGGTATC
CTCAAGCCAGGCATGGTCGTCACCTTCGCCCCCGCTAATTTGACCAGTGAAGTCAAGTCC
GTTGAGATGCACCACGTCTCCCTTCCTGAGGCCGTTCCAGGAGATAACGTCGGTTTCAAC
GTCAGAAACTTGTCTGTCAAG---------------------------------------
------------------------------------------------------------
------------------------------GATATTCGTCGTGGTATGGTCGCTGGTGAC
TCCAAAAACGACCCTCCCCAAGAGACTGAGGCGTTCACTGCTCAAGTTATCATCCTCAAC
CATCCTGGACAA------------------------------------------------
------------------------------------------------------------
------------------------------------------------------------
------------------------------------------------------------
---------------------------------------------------ATCCACGCT
GGATACGCCCCTGTACTTGATTGCCATACTGCCCACATCGCCTGCAAATTCACTGAGCTT
CTCTCCAAA---------------------------------------------------
---------------------------------------GTCGATCGTCGTACCGGTGCT
GAGACCGAGGGCGCTCCCAAGAACCTCAAGAACGGTGATGCAGCTATGGTCAAGCTCACT
CCTTCCAAACCCATGTGTGTTGAGCCCTTCACTGATTACCCCCCTCTCGGTCGTTTTGCC
GTTCGTGACATGAGACAAACTGTAGCTGTCGGAATTCTGA
>Calomyxa_metallica_JX481319
------------------------------------------------------------
n-----------------------------------------------------------
------------------------------------------------------------
------------------------------------------------------------
------------------------------------------------------------
------------------------------------------------------------
------------------------------------------------------------
------------------------------------------------------------
------------------------------------------------------------
------------------------------------------------------------
------------------------------------------------------------
------------------------------------------------------------
------------------------------------------------------------
------------------------------------------------------------
------------------------------------------------------------
------------------------------------------------------------
------------------------------------------------------------
------------------------------------------------------------
------------------------------------------------------------
------------------------------------------------------------
------------------------------------------------------------
------------------------------------------------------------
------------------------------------------------------------
------------------------------------------------------------
------------------------------------------------------------
------------------------------------------------------------
------------------------------------------------------------
--------------------GGGACCCACTTTACTCGAGGCACTCGACTCAGTTACT---
------------------------------------------------------------
------------------------------------------------------------
---------------------GAGCCCAAGAGACCGACCGAGAAGCCCCTCCGCATTCCC
CTACAGGATGTGTACAAGATCGGTG-----------------------------------
------------------------------------------------------------
-------------------GTATCGGAACGGTCCCCGTCGGACGTGTTGAGACTGGTATC
CTCAAGCCAGGCATGAACGTCACCTTCTCCCCCGCCGCTATGACCACTGAAGTCAAGTCT
GTTGAGATGCACCACGTCTCCCTCCCTGAGGCTGTTCCAGGGGACAACGTAGGTTTCAAC
GTTAAGAACTTGTCTGTCAAG---------------------------------------
------------------------------------------------------------
------------------------------GATATTCGTCGTGGTATGGTCGCTGGTGAC
TCCAAGAACGATCCCCCCCAGGAAACTGAGGACTTCAACGCTCAAGTCATCATCCTCAAC
CACCCCGGTCAG------------------------------------------------
------------------------------------------------------------
------------------------------------------------------------
------------------------------------------------------------
---------------------------------------------------ATCCACGCT
GGATATGCCCCAGTGCTCGACTGCCACACCGCCCACATTGCATGCAAGTTTACCGAGATC
GTGTCCAAG---------------------------------------------------
---------------------------------------GTCGACCGCCGCTCTGGTCAA
GAGACTGAGGCCGCCCCCAAGAACATCAAGAACGGTGATGCTGCCATCGTTAGACTCACC
CCCTCCAAGCCCATGTGCGTTGAGTCCTTCGCTGACTACCCTCCTCTCGGTCGTTTCGCC
GTC
>Ceratiomyxa_fruticulosa_CH1_EF513186
---------------------------------------------------------ATC
TACAAATGCGGTGGTATTGATACACGTACCATTGAAAAATTCGAAAAAGAGGCCAATGAA
ATGGGCAAAGGTTCCTTCAAATACGCTTGGGTTCTTGATAAACTCAAGGCCGAGAGAGAA
AGAGGAATCACCATCGATATCGCTCTCTGGAAATTCGAAACTGCCAAATACTACTTCACA
ATCATTGATGCCCCAGTTATGAAAACGTTTTATTAACTTATTCTCTATTATTTGTTATTT
GTTATTTATCATTCAATTCACATGGTTACAAACACGTTTTATTTAAATTTATTAAACTTA
TTTTATATTTTAACGCAATGTTTTCTTATCAACCACTTTTTTTTCTTTTATACAGGCCAC
AGAGATTTCATCAAGAACATGATTACTGGTACTTCACAAGTATGTTGGAATTTTATTTTT
ATTGTTTTCTATTTTTATTTTTTGTTTTTAATATCGCTTTTTGTTCTTGAATTTCTTTTC
CCTATTCGTTTTTTAAACCAATCAATTCACATTTTCAATTATTTTCCATCCACATTCATA
TTCTTATTTTCTCTTCTTTTTTCAA-----------------------------------
------------------------------------------------------------
------------------------------------------------------------
------------------------------------------------------------
------------------------------------------------------------
------------------------------------------------------------
------------------------------------------------------------
------------------------------------------------------------
------------------------------------------------------------
---------------------------------------TAGGCTGATGCAGCTGTCCTC
GTTGTTGCGTCACCCACTG-----------------------------------------
------------------------------------------------------------
----------------------------------------------GTGAGTTCGAGGCT
GGTATTGCCAAGAATGGACAAACCCGTGAGCACGCTCTTCTCGCTTACACCCTTGGTGTC
AAACAAATGATCGTCGCCATCAACAAAATGGATGAGAAAACCGTCAACTGGAGTCAAGCT
CGTTACGATGAGATCCAAAAAGAACTTGCATCGTTCCTTAAAAAGATCGGATACAATCCC
GAGAAAGTCCCCTTCGTCCCCATTTCAGGTTGGAACGGAGATAACATGTTAGAGAAATCC
CCCAATCTCCCATGGTACAAAGGTCCCACACTCCTCGAGGCTCTTGACTCCGTTCAAGTA
AGTATTTGGTTTTTCTTCTTACTCCTAATCTCTTTGATCAATTCCTTATTTTTTTACTAT
TATTCCTCTCGATGTCTTATTATTTATTTATTTTTTCTCCTTTTAAAAAAACATCAG---
---------------------GAACCCAAACGTCCACTAGACAAACCCCTCCGTCTCCCC
TTACAAGATGTCTACAAGATTGGAG-----------------------------------
------------------------------------------------------------
-------------------GTATTGGCACAGTCCCCGTTGGTCGTGTTGAGACTGGTGTC
CTCAAACCAGGTATGAACGTTACCTTCGCCCCTGCTAATTTAACCACTGAAGTTAAATCT
GTTGAGATGCATCACGTTGCTCTTACTGAAGCTTTCCCTGGAGATAACGTCGGATTCAAC
GTTAAAAATCTTTCTGTTAAAGTAAGTTGAAAACATTTTTTTAACTCTCTTTTTCTTCTT
GGTTGGTTTCTTTCTTTTCTTTCAAAATGTTTTTTTTTTAATATCTAATTTTGTTTATTT
ATTTTTATTTTATTATTTAA------TAG-GATATTCGTCGTGGTATGGTTGCTGGTGAT
GCTAAAAACGATCCCCCCATTGAGACTGAGTCCTTCAACGCTCAAGTTATCGTTCTTAAC
CACCCTGGTGCC------------------------------------------------
------------------------------------------------------------
------------------------------------------------------------
------------------------------------------------------------
---------------------------------------------------ATCCACGCA
GGTTACGCCCCAGTTTTAGATTGCCACACTGCTCACATTGCGTGCAAATTCTCCGAGATC
TTAACCAAA---------------------------------------------------
---------------------------------------GTTGACCGTCGTACTGGTGCT
GAGCTTGAGGCAAGCCCCAAAAACATCAAAAATGGTGATGCCGCCATCGTTCAACTCACC
CCCTCCAAACCCTTGTGTGTTGAGACTTTC--------------n---------------
-----------------
>Ceratiomyxa_fruticulosa_CH2_EF513187
----------------------------GCTGGTAATCTACCACCACTGGTCACTTGATC
TACAAATGCGGTGGTATCGATAAACGTACCATTGAGAAATTCGAAAAAGAGGCCAACGAA
ATGGGCAAAGGATCCTTCAAATACGCTTGGGTTTTGGACAAACTCAAGGCCGAACGTGAG
CGTGGTATCACCATCGACATTGCCCTCTGGAAATTCGAGACTGCCAAATACTACTTCACC
ATCATCGATGCCCCA---------------------------------------------
------------------------------------------------------------
------------------------------------------------------GGACAC
AGAGATTTCATCAAGAACATGATTACCGGAACATCACAAGTAAGTTACAGTTTTTGTTTT
TTATTGTTTGCCTTTTTTTTTTTTACAATTTCCTTTCTATCCTCTCCGCTTCTCTTTCTT
TTTGGGCCCTACTATTCTGCAAACACAGTGACAGAGCGATTTGACTCATCGAGAGGCGCC
CCTCTTTGTTTGTTTGACGCCTTTTTTTTCCCCTTTTCGACTTTTGTTCTCATTTGAATA
TTTATTAACATCTTTTTCTTTTTCTTCTTTTTTTTCTCCA--------------------
------------------------------------------------------------
------------------------------------------------------------
------------------------------------------------------------
------------------------------------------------------------
------------------------------------------------------------
------------------------------------------------------------
------------------------------------------------------------
---------------------------------------CAGGCTGATGCTGCTGTCCTT
GTCATTGCTTCACCCACTG-----------------------------------------
------------------------------------------------------------
----------------------------------------------GTGAGTTCGAGGCT
GGTATTGCCAAGAACGGTCAAACCCGTGAGCACGCTCTCCTTGCTTACACTCTTGGTGTC
AAACAAATGATTGTCGCCATCAACAAGATGGATGAGAAAACCGTCAACTGGAGTCAAGCT
CGTTACGATGAAATCGCCAAAGAGCTTGGATCCTTCCTTAAAAAGATCGGATACAACCCT
GAGAAAGTCCCCTTCGTCCCCATTTCCGGATGGAACGGAGATAACATGTTAGAGAAATCC
GCTAACCTCCCCTGGTACAAAGGTCCCACACTCCTTGAAGCCCTCGACAGTGTCACTGTA
AGTAACTATTTGATTTGTTTTTATTCTTCCTTTGTTCTTTTCGTTTCATTTCCTTTGCTC
ATTCTTCTTTTTTTATTTTTTTTTGTTTGCTTGTTTATTTCGTTCTTATGTTTTCTTCCC
TTTTTTAG-------------GACCCCAACCGCCCGGGGGAAAAACCCCCCCTCTTGCCC
TACCCCAAGGGTCCCCCAATGGGGG-----------------------------------
------------------------------------------------------------
-------------------GAGTCGGAACGGGGCCCGCCGGGCGGGTGGAACCTGGTGGC
CCCAAACCCGGAGGAAACGTAACCTTGGCCCTGGCCAATTGGACCGCGGAGGCCAAATCG
GCCAAGGAGATCAACTTTGTTCTTGTGGAGGCTGCCCCCGGAAATAACGCCGGATCCAAC
GTCAAGAATCTTTCCGTCAAGTAAGTTTGAGTTCTTTTTATTCTTTCTTCTCTTTTGTTT
TTTCCTTTCTTTCTTTTCTTTTCTTTTCCCTCACTTGTTTTTGGTTCTTATTTATTTTTT
TTTACCTCTTTTTTTTTTTATCAGAGCTAGGATATTCGTGGTGGTATGGTCGCTGGTGAC
GCCAAGAACGACCCCCCCAAGGAAACCGAAAGATTCGAAGCCCAAGTTATCGTTCTTAAC
CACCCCGGTGTG------------------------------------------------
------------------------------------------------------------
------------------------------------------------------------
------------------------------------------------------------
---------------------------------------------------ATCCACGCT
GGGTACGCTCCAGTCTTAGATTGCCACACTGCTCACATTGCCTGCAAATTCGAAGAGATC
CTCACCAAA---------------------------------------------------
---------------------------------------GTGGATAGTCGTAATGGTGGT
GAGGTCGAAGCAGGACCCAAAAACATCAAGAACGGCGAGGCCGCCGACGCCAGACTCCTC
CCCTCCAAACCCACGTGCGTTGAGAGTTTCACGGACTACCCACCCTTAGGTACCCTATCT
TTCTATATCTTTTATTTTTGTTTATTTTTATCTTTCATCTAATTTAATTTTATCATCCTC
ATTTCGTGTGTTCCTTTTCCATTTTCTTTTCCAATTTTATTCAACGATCCCCTTCTCATT
TGTTATATCTTAGTAGTCTCTCATCAGGACGT
>Ceratiomyxa_fruticulosa_F_EF513188
------------------------------------------------------------
TACAAATGCGGTGGTATCGATAAACGTACCATCGAGAAATTCGAAAAAGAGGCCAATGAA
ATGGGCAAAGGTTCCTTCAAATACGCCTGGGTTCTTGATAAACTCAAGGCCGAGCGCGAA
CGTGGTATCACCATCGATATTGCCCTCTGGAAATTCGAGACCGCCAAATACTACTTCACC
ATCATTGATGCCCCA---------------------------------------------
------------------------------------------------------------
------------------------------------------------------GGACAC
AGAGATTTCATCAAGAACATGATTACTGGAACATCTCAAGTAAGCACTATTTTTTTTGTT
CGCTTCTTGTTTTATTCCCTTTCCGTTGATGGAAAACATCAAGCGTTTATGATTCACCGA
GTTTTCGCCATGATTCACCTTAACCAATGTTCGACCCCATACTTATTTTTTTTTCCCTCT
TTTTCTTTTCCTTA----------------------------------------------
------------------------------------------------------------
------------------------------------------------------------
------------------------------------------------------------
------------------------------------------------------------
------------------------------------------------------------
------------------------------------------------------------
------------------------------------------------------------
------------------------------------------------------------
---------------------------------------TAGGCTGATGCTGCAGTCCTT
GTTATTGCTTCACCCACTGGTAATGACACATCTCATGTTATTTATCATTATCGTTATCGT
TATCATTATCGCTATTGTTTATCTAACCTATTCATAGCGATTCGTGAGTTACCTTTTTTG
TTTGAAAGTGTTTTTGACTCGCTTTTCTTTTTCTTCTTTCAATTAGGTGAGTTCGAGGCT
GGTATTGCCAAGAACGGACAAACCCGTGAGCACGCCCTCCTTGCTTACACCCTTGGTGTC
AGACAAATGATCGTTGCCATCAACAAGATGGATGAGAAAACCGTCAACTGGAGTCAAGCT
CGTTATGAGGAGATCCAAAAAGAGCTTGCATCTTTCCTTAAAAAGATCGGATACAACCCC
GAGAAAGTCCCCTTCGTCCCCATCTCTGGTTGGAACGGAGATAACATGTTAGAGAAATCC
GCTAACCTCCCCTGGTACAAAGGTCCCACACTCCTTGAGGCCCTCGACTCTGTCACA---
------------------------------------------------------------
------------------------------------------------------------
---------------------GAGCCCAAACGTCCATCGGACAAACCCCTCCGTCTCCCC
TTACAAGATGTCTACAAGATTGGAG-----------------------------------
------------------------------------------------------------
-------------------GTATTGGCACAGTCCCCGTCGGTCGTGTTGAGACTGGAATC
CTCAAACCCGGTATGAACGTTACCTTCGCCCCCGCTAACATGACAACTGAGGTCAAATCC
GTCGAGATGCATCACGTTGCCCTCGCAGAAGCCCTTCCCGGAGACAACGTCGGCTTCAAC
GTTAAGAATCTTTCCGTGAAAGTAAGTCTTTCTTTTCTTTCTCTCTCCTCATCGATTCTT
TCTTTTTTATGCCCCCTTCGATTCCTCTTTTCGGCTTTCTCTTTCTTTTTATCTCCATTC
TAATCTTTTTATCTTCCTTCCTTCAATAG-GATATTCGTCGTGGTATGGTTGCTGGTGAT
GCCAAGAACGATCCCCCCATTGAGACTGAGTCCTTCACCGCTCAAGTTATCGTCCTTAAT
CACCCCGGTGTT------------------------------------------------
------------------------------------------------------------
------------------------------------------------------------
------------------------------------------------------------
---------------------------------------------------ATCCATGCT
GGTTATGCCCCAGTCTTGGATTGCCACACTGCCCACATTGCTTGCAAATTCGCTGAGATC
TTGACCAAA---------------------------------------------------
---------------------------------------GTCGATCGTCGTACTGGTGCT
GAGATTGAGGCTGGACCCAAAAACATCAAGAACGGTGATGCCGCTATTGTCAACCTCCTC
CCTTCCAAACCCATGTGCGTTGAGACCTTCACTGAGTACCCACCCTTAGGTAAGCAGTCA
CTTCTTTTGTCATCCTCCTTTTGTTTTCCCCCAACTTTTTTCTTCGTTTCTCTCTCCATC
CTTACCCGGACCAGTTCCTAATCCTCCTTCTCTAG-------------------------
----------
>Cornuvia_serpula_JX481320
------------------------------------------------------------
n-----------------------------------------------------------
------------------------------------------------------------
------------------------------------------------------------
------------------------------------------------------------
------------------------------------------------------------
------------------------------------------------------------
------------------------------------------------------------
------------------------------------------------------------
------------------------------------------------------------
------------------------------------------------------------
------------------------------------------------------------
------------------------------------------------------------
------------------------------------------------------------
------------------------------------------------------------
------------------------------------------------------------
------------------------------------------------------------
------------------------------------------------------------
------------------------------------------------------------
------------------------------------------------------------
------------------------------------------------------------
------------------------------------------------------------
------------------------------------------------------------
------------------------------------------------------------
------------------------------------------------------------
------------------------------------------------------------
------------------------------------------------------------
---AACCTCCCATGGTACAAGGGGCCCACTCTCCTCGAGGCACTCGATGCCGTTCAA---
------------------------------------------------------------
------------------------------------------------------------
---------------------GAGCCCAAGAGACCAACCGAGAAGCCCCTCCGTGTTCCC
CTCCAGGACGTTTACAAGATCGGAG-----------------------------------
------------------------------------------------------------
-------------------GTATTGGAACTGTGCCTGTAGGTCGTGTTGAGACTGGTGTC
CTTAAGCCAGGAATGAACGTTACTTTCTCCCCCGCTGGTTTGTCTACTGAAGTTAAGTCA
GTCGAGATGCATCACGTTGCTCTCCCTGAGGCCGTCCCAGGAGACAACGTCGGATTCAAC
GTTAAGAACTTGTCCGTCAAG---------------------------------------
------------------------------------------------------------
------------------------------GATATCCGCCGTGGTATGGTCGCTGGTGAC
GCCAAGAACGATCCCCCCCAGGAGACTGAAGACTTCAATGCACAAGTCATCATCCTCAAC
CACCCCGGTCAA------------------------------------------------
------------------------------------------------------------
------------------------------------------------------------
------------------------------------------------------------
---------------------------------------------------ATTCACGCT
GGTTATGCACCAGTGCTCGATTGCCACACTGCTCACATTGCCTGCAAGTTCGCTGAGTTG
GTGTCCAAG---------------------------------------------------
---------------------------------------GTCGACCGTCGTTCTGGTCAG
GCTACCGAGGAGGTGCCCAAGAGCATCAAGAACGGTGATGCTGCTATCGTCAGACTTGTC
CCCTCCAAGCCCATGTGCGTTGAATCCTTTGCTGAGTACCCCCCTCTCGGACGTTTCGCC
GT
>Cribraria_argillacea_EF513189
------------------------------------------------------------
N------------GTATTGACAAGAGAACCATTGAGAAGTTCGAGAAGGAGGCGTCTGAG
ATGGGCAAGGGTTCCTTCAAGTATGCTTGGGTGTTGGACAAACTCAAGGCAGAACGTGAG
CGTGGTATTACCATTGACATCGCCTTGTGGAAGTTCGAGACCACCAAGTACTACTTCACC
ATCATCGATGCCCCA---------------------------------------------
------------------------------------------------------------
------------------------------------------------------GGTCAC
CGTGATTTCATCAAGAACATGATCACTGGTACCTCTCAGGTATGCTCCTGTTCTTTCCTT
ACCTTTCTCGGTACTCAGTCAATCAACTGCTTCTCTCTTATGCTTACTTTGTTGCGTCTC
GAAAGAGGCAAGCATCTCAGCTTGTATGCTATGCTGATGCTTCCTCCGAGAGTCGCATCA
GAAGTACAGTTGGTTGTCAAATAAACATTGGAGTGCAGAATGACACATCATACGAATCCT
TACCTCCGACAGATACAGCATATGAATACAAAAGGCTATGCTAGTATCTTCTGAAGCATG
AGGAATAGAAGACTGTTGAATAATGAATATTGTTTG------------------------
------------------------------------------------------------
------------------------------------------------------------
------------------------------------------------------------
------------------------------------------------------------
------------------------------------------------------------
------------------------------------------------------------
---------------------------------------CAGGCGGACGCAGCCGTTCTC
GTTATTGCTTCTCCCACTG-----------------------------------------
------------------------------------------------------------
----------------------------------------------GTGAGTTCGAGGCA
GGTATTGCCAAGAGTGGGCAGACCCGTGAACACGCCCTGCTTGCCTACACTCTGGGAGTG
AAGCAGATGATCGTGGCCATCAACAAGATGGACGAGAAGACCGTCAACTGGTCTCAGCCC
CGTTATGATGAGATTGTGAAGGAGGTGTCTTCCTTTGTGAAGAAGATTGGCTACAACCCC
GAGAAGATCCCCTTCATCCCCATCTCTGGATGGAACGGAGACAACATGCTCGAGAAGTCC
TCCAACTTGCCCTGGTACAAGGGTATGACCCTCTTGGAAGCCCTTGACTCCGTGCAA---
------------------------------------------------------------
------------------------------------------------------------
---------------------GAGCCCAAGCGCCCCTTGGACAAGCCCCTTCGTATCCCC
CTCCAGGACGTGTACAAGATTGGAG-----------------------------------
------------------------------------------------------------
-------------------GCATTGGAACAGTCCCTGTGGGTCGTGTTGAGACGGGTATT
CTCAAGCCAGGCATGGTGGTGACCTTCTCCCCTGCCAACATGACCACTGAAGTCAAGTCT
GTGGAGATGCACCACGTTGCCCTCACTGAGGCTTCCCCAGGAGACAACGTCGGATTCAAC
GTGAAGAATTTGTCTGTGAAG---------------------------------------
------------------------------------------------------------
------------------------------GATATCCGTCGTGGTATGGTTGCTGGTGAC
TCCAAGAACGATCCTCCCCAAGAGACTGATACCTTTGAAGCCCAAGTCATTATCCTTAAC
CACCCTGGTCAGGTAAAATAGGCTCTTTACTTTCTTCTCTTTCTCCTGTTTCCTTCTTTT
TCCTCCTCCTTTCTTCTCTCTTTCTCTCTCACCCCTCCTTGTTCCTCCTCCTCCTTTCTT
CTCTCTCTTTCTCTCTCTCCCTTCCTTGTTCCTCCTCCTCTCTCTCTCTCTTTCTCTCCT
CCTTGTTCTTCCTCCTCCTCCTTCTTTCAAGAGATTAACAAAGATAAAACAG--------
---------------------------------------------------ATTCACGCT
GGATATGCGCCAGTGTTGGATTGCCACACTGCCCACATTGCCTGTAAATTCACTGAGCTC
ATGGAGAAG---------------------------------------------------
---------------------------------------GTGGACCGTCGTTCGGGCCAA
AAGCTCGAAGATGCCCCCAAGAACGTGAAGAACGGAGATGCAGCCATGGTCCTGCTCACC
CCCACCAAACCCATGTGTGTGGAGCCATTCACAGACTACCCCCCCTTGGGACGCTTTGCC
GTCCGTGA
>Cribraria_cancellata_AY643815
------------------------------------------------------------
N-------TGGTGGTATCGATAAGAGAACCATTGAGAAGTTCGAGAAGGAGGCATATGAG
ATGGGAAAGGGTTCCTTCAAATACGCCTGGGTGTTGGACAAACTCAAGGCTGAGAGAGAA
CGTGGTATTACCATCGATATTGCTTTGTGGAAGTTCGAGACCAACAAGTACTACTTCACT
ATTATTGATGCCCCA---------------------------------------------
------------------------------------------------------------
------------------------------------------------------GGACAC
CGTGATTTCATCAAGAACATGATTACTGGTACTTCCCAGGTACGTCTTTGTCTTTGTCTT
TCTCTTTCTCTTTCTCTTTATCTTTATCTCTCTCTTTATTTATCTCTTTATCTTTCTCCC
TCTCTTTTTACGGGAAAGGCGATCTCGTCTTCTCTCTTTCTCTCTGATAATCGATTGAGA
GGGATTCATTCAAACAGAGAATGAGTGAATGAAATTTCTCCAATCGATTTCAGTTTGGCT
CTCTACTCTTTCCCTCGTCACTAGCTGTCAGTTATTTTCGACTCTTTCCTTGTCTTCCCT
TGTCTCTTCTTCTCGCGTCTCTCTCTCTTTCTGGCGTCTCTCTAATTAGCTCGTTGACTA
ACTCGTCCTTCTCTCT--------------------------------------------
------------------------------------------------------------
------------------------------------------------------------
------------------------------------------------------------
------------------------------------------------------------
------------------------------------------------------------
---------------------------------------TAGGCTGATGCTGCCGTTCTC
GTTATTGCCTCCCCTACTG-----------------------------------------
------------------------------------------------------------
----------------------------------------------GAGAGTTCGAAGCT
GGTATTGCTAAGAACGGACAGACTCGTGAACACGCACTCCTTGCCTACACTTTGGGAGTC
AAGCAGATGATTGTGGCTATTAACAAGATGGACGACAAATCAGTCAACTGGGCACAAGCT
CGTTACGATGAAATCGTCAAGGAGGTTTCTTCCTTCGTTAAGAAGATCGGATACAACCCC
GAGAAGATTCCCTTCGTCCCAATCTCTGGATGGAACGGTGATAACATGCTCGAGAAGAGC
CCCAACTTGGCCTGGTACAAGGGTCCCACTCTCCTTGAAGCTCTCGATGCCGTTACT---
------------------------------------------------------------
------------------------------------------------------------
---------------------GAGCCTAAACGTCCTTTAGACAAACCCCTTCGTATCCCC
CTTCAAGATGTCTACAAGATCGGAG-----------------------------------
------------------------------------------------------------
-------------------GTATTGGAACTGTCCCCGTCGGTCGTGTTGAGACTGGAATC
CTCAAGCCAGGAATGGTTGTCACTTTCTCCCCTGCCAATCAAACTACTGAAGTCAAGTCC
GTCGAGATGCATCACGTCGCTCTTACTGAGGCACTTCCTGGAGATAATGTCGGTTTCAAC
GTGAGGAATTTGAGTGTGAAA---------------------------------------
------------------------------------------------------------
------------------------------GATATTCGCCGTGGTATGGTGGCAGGAGAT
TCTAAGAATGACCCTCCGCAAGAGATTGAGAGCTTCGAAGCGCAAGTAATCATACTCAAC
CACCCTGGTCAA------------------------------------------------
------------------------------------------------------------
------------------------------------------------------------
------------------------------------------------------------
---------------------------------------------------ATTCATGCT
GGTTATGCACCTGTTTTGGATTGCCACACTGCGCATATTGCCTGCAAATTCACTCAGCTC
CTTGAGAAA---------------------------------------------------
---------------------------------------GTTGACCGTCGTTCTGGACAG
AAACTCGAAGACGCTCCTAAGAATGTGAAGAATGGAGATGCAGCTATTGTCCTCCTTCAT
CCTAGCAAGCCTATGTGTGTTGAGCCTTTTACTGACTACCCTCCTCTTGGTCGTT
>Cribraria_tenella_JX481321
------------------------------------------------------TTGATC
TATAAGTGTGGTGGTATCGACAAGAGAACCATCGAGAAGTTCGAGAAGGAGGCATCCGAG
ATGGGGAAGGGTTCGTTCAAGTATGCGTGGGTGTTGGACAAACTCAAGGCTGAGCGTGAG
CGTGGTATCACCATTGATATCGCCTTGTGGAAGTTCGAAACCAACAAGTACTACTTCACC
ATCATTGATGCCCCA---------------------------------------------
------------------------------------------------------------
------------------------------------------------------GGCCAT
CGTGACTTCATCAAGAACATGATCACCGGAACCTCTCAGGTATCTCTTCTTTCTCCTCGA
TTCTCTTTCAGCTTGCTCTTTCATCGTCGAAAGATGCATATGCTTTGATTCAATAGAGAC
TGTCAGTATCTCCTCATACATCGATGTCGAATATAGCTATGACAGTTCTTCGATTGACAT
ATGCAGCGAGTGTTCCATATGCTAGCATTTGAATCATGTATGAGGAGTACCTATGTCTAT
GATAGCTTTGAATGTGATAGCGAACAGTATATAATGTGTTTGTTTT--------------
------------------------------------------------------------
------------------------------------------------------------
------------------------------------------------------------
------------------------------------------------------------
------------------------------------------------------------
------------------------------------------------------------
------------------------------------------------------------
---------------------------------------CAGGCTGATGCAGCAGTTCTC
GTTATTGCATCCCCCACTG-----------------------------------------
------------------------------------------------------------
----------------------------------------------GTGAGTTCGAGGCA
GGTATTGCCAAGAGCGGACAGACCCGTGAGCACGCTCTCCTTGCCTACACGTTGGGAGTG
AAGCAGATGATCGTTGCCATCAACAAGATGGACGAGAAGACTGTCAACTGGTCCCAAGCG
CGTTACGACGAGATCGTGAAGGAGACCTCCTCCTTCGTGAAGAAGATCGGGTACAACCCC
GAGAAGATCCCCTTTGTCCCCATCTCTGGGTGGAACGGTGATAACATGCTCGAGAAGTCC
ACCAACCTCCCCTGGTACAAGGGTCCCACTCTCCTCGAGTCCCTTGACAATGTGCAA---
------------------------------------------------------------
------------------------------------------------------------
---------------------GAGCCCAAGCGCCCACTCGACAAGCCCCTCCGTATCCCC
CTTCAGGACGTCTACAAGATCGGAGGTATATAACCATTCTCTCTCTTCCTTTCCCTCTCT
CATTTAAGCTCTTCCTCTTCTCTCCTCTTTCTCTTCTCATCTCTCGAAGATAAAAGCAAG
TCTAATTGTGATATGTAG-GTATTGGAACGGTCCCTGTGGGTCGTGTAGAGACTGGAGTG
TTGAAGCCAGGAATGATGGTCACCTTCTCTCCCGCCGCCATGACTACTGAAGTCAAGTCT
GTTGAAATGCATCATGTTGCCCTCACGGAGGCTTCTCCAGGGGACAACGTTGGTTTCAAC
GTGAAGAACTTGTCCGTGAAG---------------------------------------
------------------------------------------------------------
------------------------------GATATCCGTCGTGGTATGGTTGCTGGTGAC
TCCAAGAACGATCCTCCCCAAGAGACTGATACCTTTGAGGCCCAAGTCATCATCCTCAAC
CACCCTGGTCAAGTATGTCTTCTCACTTCCTCTCTTCTAAGATATCTCTTTCTTCCCCCC
CTCTCTTTTCTCGTCTACCTCCATCTATTCCTTCTTTCTTTGTTGTTCTCATTGAGTTGT
TGCTCACTCTCTATACTTAATAG-------------------------------------
------------------------------------------------------------
---------------------------------------------------ATTCATGCT
GGATATGCGCCAGTGTTGGATTGCCACACCGCCCACATTGCCTGTAAATTCACTGAACTC
CTTGAGAAA---------------------------------------------------
---------------------------------------GTGGACCGTCGCTCTGGCCAG
AAGCTCGAAGATGCCCCCAAGAACGTGAAGAACGGAGACGCCGCCATGGTCCTCCTCACC
CCCACCAAACCCATGTGTGTGGAGCCCTTCACAGACTACCCCCCCCT
>Cribraria_violacea_JX481322
---------------------------GCTGGTAAGTCCACCACCACTGGTCACTTGATC
TACAAGTGCGGAGGTATCGACAAGCGTACCATCGAGAAGTTCGAGAAGGAGGCGTCCGAG
ATGGGAAAGGGCTCCTTCAAGTATGCCTGGGTGTTGGACAAGCTCAAGGCTGAGCGCGAG
CGTGGAATCACCATCGACATTGCCTTGTGGAAGTTCGAGACCCAGAAGTACTACTTCACT
ATCATCGACGCTCCT---------------------------------------------
------------------------------------------------------------
------------------------------------------------------GGGCAT
CGTGATTTCATCAAGAACATGATCACTGGTACCTCTCAGGTATGCTTTTGTGTTGATGTG
CACTTAATCATTTATGCCGTGAACTTGTGTGATTGGAAGCAATTGTTGTATATATTCGCC
GAAATTGTGATGGATTAGCGATAACTTGCGTTTCCTATGTTGTAATTGGATCAATGCTGA
TATCCATCTCTTCG----------------------------------------------
------------------------------------------------------------
------------------------------------------------------------
------------------------------------------------------------
------------------------------------------------------------
------------------------------------------------------------
------------------------------------------------------------
------------------------------------------------------------
------------------------------------------------------------
---------------------------------------CAGGCCGATGCCGCCGTGCTC
GTGATTGCCTCACCCACTG-----------------------------------------
------------------------------------------------------------
----------------------------------------------GTGAGTTCGAGGCT
GGTATTGCCAAGACTGGTCAGACCCGTGAGCACGCCCTCCTTGCCTACACTCTGGGAGTC
AAGCAGATGATCGTCGCTATCAACAAGATGGACGAGAAGACCGTCAACTGGTCGCAGGCC
CGTTATGACGAGATCGTCAAGGAGACCGCATCGTTCGTGCAGAAGATCGGATACAACCCC
GAGAAGATCCCCTTCGTCCCCATCTCTGGCTGGAACGGAGACAACATGTTGGAGAAGTCT
CCCAACCTCCCCTGGTACAAGGGCCCCACCCTCCTTGAGGCTCTCGATGGCGTGACC---
------------------------------------------------------------
------------------------------------------------------------
---------------------GAGCCCAAGCGCCCCGTCGACAAGGCGCTCCGCGTTCCC
CTCCAGGACGTCTACAAGATCGGAG-----------------------------------
------------------------------------------------------------
-------------------GTATCGGAACTGTCCCCGTGGGTCGTGTGGAGACTGGTGTC
TTGAAGCCAGGCATGGTCGTGACCTTCGCCCCCGCCAACATGACCACTGAAGTCAAGTCC
GTCGAGATGCACCACGTCGCCCTCCAGGAGGCTCTTCCAGGCGACAACGTCGGTTTCAAC
GTGAAGAACTTGTCCGTGAAG---------------------------------------
------------------------------------------------------------
------------------------------GATATCCGCCGTGGTATGGTCGCTGGTGAC
TCCAAGAACGATCCTCCCCAAGAATGCGAGACCTTCGAGGCCCAGGTCATCATCCTCAAC
CACCCCGGCCAG------------------------------------------------
------------------------------------------------------------
------------------------------------------------------------
------------------------------------------------------------
---------------------------------------------------ATCCATGCT
GGATACGCACCCGTGTTGGATTGCCACACCGCCCACATCGCTTGCAAGTTCTCTGAGCTC
CTTGAGAAGGTATGTCGCTGTCTCTTTGTTATATGATTGATCATTGATATGAGATGCGTT
GATTGTGTGATATCCTTTGCTCATGCATCTTGATTAG--GTCGATCGTCGTTCTGGACAG
AAGTTGGAGGACGCCCCCAAGAACGTCAAGAACGGTGATGCCGCCATGGTGTTGCTCACC
CCCACCAAGCCCCTCTGCGTCGAGCCCTTCACCGACTACCCTCCTCTGGGTCGCTTCGCC
GTGCGTGACATGAG
>Cribraria_vulgaris_EF513190
---------------------------------------------------------ATC
TACAAGTGTGGTGGTATCGACAAGAGAACCATCGAGAAGTTCGAGAAGGAAGCCTCTGAG
ATGGGCAAGGGATCGTTCAAATACGCTTGGGTGTTGGATAAACTCAAGGCTGAACGTGAA
CGTGGAATCACCATTGATATCGCCTTGTGGAAGTTCGAAACCAACAAGTACTACTTCACC
ATTATTGATGCCCCC---------------------------------------------
------------------------------------------------------------
------------------------------------------------------GGCCAT
CGTGATTTCATCAAGAACATGATTACTGGTACCTCTCAGGTAAGTCCCTCTCTCTTTCTC
CATTCTATCTCTCCCTCTCTTTCTCGATCGATTCATCTTCGAGTAATGCATATGATCATT
TGACACATGTCTCGATTCCATTCTATGTGTCTGTCATTCTCTTGTTGCACTGTGTAACAG
AAAGAATAATTATTGAGCATTTGTTTTTTTTTTTTTTTTTTTTTTTTGTTATTA------
------------------------------------------------------------
------------------------------------------------------------
------------------------------------------------------------
------------------------------------------------------------
------------------------------------------------------------
------------------------------------------------------------
------------------------------------------------------------
------------------------------------------------------------
---------------------------------------TAGGCCGATGCAGCAGTTCTC
GTTATTGCTTCTCCCACTG-----------------------------------------
------------------------------------------------------------
----------------------------------------------GTGAGTTCGAAGCT
GGTATTGCTAAGAGCGGCCAGACCCGTGAACACGCCCTCCTTGCCTACACTTTGGGTGTG
AAACAGATGATCGTTGCTATCAACAAGATGGATGAGAAGACAGTCAACTGGTCTCAAGCT
CGTTATGATGAAATCGTGAAGGAGACTTCCTCTTTCGTGAAGAAGATCGGATACAATCCC
GAGAAGATCCCCTTCGTCCCCATTTCTGGATGGAACGGAGACAACATGCTTGAGAAGTCT
GCCAATCTCCCATGGTACAAGGGTGTCACTCTCCTTGAAGCTCTTGACGCTGTCCAA---
------------------------------------------------------------
------------------------------------------------------------
---------------------GAACCCAAGCGTCCCCTCGACAAGCCCCTTCGTATTCCC
CTCCAAGATGTCTACAAGATCGGAG-----------------------------------
------------------------------------------------------------
-------------------GTATTGGAACGGTTCCAGTCGGTCGTGTTGAGACCGGTGTC
CTGAAGCCAGGCATGGTCGTCACTTTCTCCCCCGCCGATATGACCACTGAAGTCAAGTCC
GTCGAAATGCATCACGTTGCTCTCACAGAAGCTTTTCCAGGAGACAACGTCGGTTTCAAC
GTGAAGAACTTGTCTGTTAAG---------------------------------------
------------------------------------------------------------
------------------------------GATATTCGTCGTGGTATGGTTGCTGGTGAC
TCAAAGAACGATCCTCCCCAAGAAACTGATACCTTTGAGGCCCAAGTTATTATCCTCAAT
CACCCTGGTCAAGTATGTCCTTTTTTTTTCTTTTTTTTTTACTTCTACTTCCCCTAACCG
TTCCCTTTCCGTCGTTTTCATTTTTTGAATTGCTTTTTTGAAATCAATAATTAATTCATA
TTGATTGATTTTCAG---------------------------------------------
------------------------------------------------------------
---------------------------------------------------ATTCATGCT
GGATATGCACCAGTGTTGGATTGCCACACTGCTCACATTGCCTGTAAATTCACTGAGCTC
CTTGAAAAA---------------------------------------------------
---------------------------------------GTCGATCGTCGTTCTGGACAG
AAACTTGAAGATGCTCCCAAGAACGTGAAGAACGGAGAAGCAGCTATGGTTCTCCTTACT
CCCACTAAACCCATGTGTGTGGAACCCTTCACAGAATACCCACCTCTGGACCGTTTCGCT
GTCCGTGAT
>Dianema_inconspicuum_JX481323
---------------------------------------------ACTGGACACTTGATC
TACAAGTGCGGTGGTATCGACAAGAGAACCATCGAAAAGTTCGAGAAGGAAGCTTCCGAG
ATGGGCAAGGGTTCCTTCAAATATGCATGGGTGTTGGACAAACTCAAGGCAGAGCGTGAG
CGTGGAATTACCATCGATATTGCCTTGTGGAAGTTCGAAACCAGCAAGTACTACTTCACC
ATCATTGATGCCCCA---------------------------------------------
------------------------------------------------------------
------------------------------------------------------GGGCAC
CGTGACTTCATCAAGAACATGATCACTGGTACCTCTCAGGTACGAGAATTTAAATTCAAG
CCTGCTCAATTGTTTACTATATTTTATTCGCACACATATAATTAACATGATTTG------
------------------------------------------------------------
------------------------------------------------------------
------------------------------------------------------------
------------------------------------------------------------
------------------------------------------------------------
------------------------------------------------------------
------------------------------------------------------------
------------------------------------------------------------
------------------------------------------------------------
------------------------------------------------------------
---------------------------------------CAGGCTGATGCTGCAGTCTTG
GTCATTGCCTCCCCCACTG-----------------------------------------
------------------------------------------------------------
----------------------------------------------GTGAGTTCGAAGCC
GGTATCGCCAAGAGCGGACAGACCCGTGAGCACGCACTTCTTGCCTACACACTCGGTGTG
AAGCAGATGATTGTTGCTATCAACAAGATGGACGACAAATCCGTCAACTGGGCCCAAGCT
CGTTACGACGAAATCGTCAAGGAGGTTTCATCCTTCGTTAAGAAGATCGGGTACAACCCC
GAGAAGATCCCTTTCGTCCCCATCTCTGGATGGCACGGAGACAACATGCTCGAGAAGTCC
CCCAACCTCCCATGGTACAAAGGATTCACCCTCCTCGAAGCACTCGACAACGTCTCA---
------------------------------------------------------------
------------------------------------------------------------
---------------------GAGCCCAAGAGACCGACAGAGAAGCCACTCCGTATCCCC
CTCCAAGATGTGTACAAGATCGGAG-----------------------------------
------------------------------------------------------------
-------------------GTATCGGAACGGTCCCTGTAGGACGTGTTGAGACTGGTATC
CTCAAGCCAGGAATGAACGTTACCTTCTCCCCCGCCAACATGACCACTGAAGTTAAGTCT
GTCGAAATGCATCACGTATCCCTCCCTGAGGCTGGCCCAGGAGACAACGTCGGTTTCAAC
GTCAAGAACTTGTCTGTTAAG---------------------------------------
------------------------------------------------------------
------------------------------GATATTCGCCGTGGTATGGTTGCTGGTGAT
GCTAAGAACGATCCCCCCCAGGAAACTGAGGACTTCAACGCTCAAGTCATCATCCTTAAC
CACCCCGGTCAG------------------------------------------------
------------------------------------------------------------
------------------------------------------------------------
------------------------------------------------------------
---------------------------------------------------ATCCACGCT
GGATACGCACCAGTGCTCGATTGCCACACCGCCCACATCGCCTGTAAATTCACTGAGATC
ATCTCCAAA---------------------------------------------------
---------------------------------------GTTGATCGTCGTACAGGTGCT
GAGACTGAGTCTACCCCCAAGAACATCAAGAACGGAGATGCTGCCATCGTTAGACTCACC
CCCTCTAAACCCATGTGCGTCGAGTCCTTCACTGATTACCCACCACTCGGTCG
>Dianema_nivale_JX481324
---------------------------------------------ACTGGACACTTGATC
TACAAGTGCGGTGGTATCGACAAGAGAACCATCGAGAAGTTCGAGAAGGAAGCTTCCGAG
ATGGGCAAGGGTTCCTTCAAATATGCATGGGTGTTGGACAAACTCAAGGCAGAGCGTGAG
CGTGGAATCACCATCGATATTGCGTTGTGGAAGTTCGAAACCAACAAGTACTACTTCACC
ATCATTGATGCCCCA---------------------------------------------
------------------------------------------------------------
------------------------------------------------------GGGCAC
CGTGACTTCATCAAGAACATGATCACTGGTACCTCTCAGGTAGGATTTAAATTCGAGCTT
GATAATTGTATTTCATATATTTTATTCGCACACATGAATTAATTTGATTTG---------
------------------------------------------------------------
------------------------------------------------------------
------------------------------------------------------------
------------------------------------------------------------
------------------------------------------------------------
------------------------------------------------------------
------------------------------------------------------------
------------------------------------------------------------
------------------------------------------------------------
------------------------------------------------------------
---------------------------------------CAGGCTGATGCTGCAGTCTTA
GTCATTGCCTCCCCCACTG-----------------------------------------
------------------------------------------------------------
----------------------------------------------GTGAGTTCGAAGCC
GGTATCGCCAAGAGCGGACAGACCCGTGAGCACGCACTCCTTGCCTACACACTCGGTGTG
AAGCAGATGATCGTTGCTATCAACAAGATGGACGACAAGTCCGTCAACTGGGCACAAGCT
CGTTACGACGAAATCGTCAAGGAGGTTTCATCCTTCGTGAAGAAGATCGGGTACAACCCC
GAGAAGATCCCTTTCGTCCCCATCTCTGGATGGCACGGAGACAACATGCTCGAGAAGTCT
GCTAACCTCCCATGGTACAAGGGATTCACCCTCCTCGAAGCACTCGACAACGTCTCA---
------------------------------------------------------------
------------------------------------------------------------
---------------------GAGCCCAAGAGACCGACCGAGAAGCCACTCCGCATCCCC
CTCCAAGATGTGTACAAGATCGGAG-----------------------------------
------------------------------------------------------------
-------------------GTATCGGAACGGTCCCTGTAGGACGTGTTGAGACTGGTATC
CTCAAGCCAGGAATGAACGTTACCTTCTCCCCCGCCAACATGACCACTGAAGTTAAGTCC
GTTGAAATGCATCACGTATCCCTCCCTGAGGCTCTCCCAGGTGACAACGTCGGTTTCAAC
GTCAAGAACTTGTCTGTTAAG---------------------------------------
------------------------------------------------------------
------------------------------GATATTCGCCGTGGTATGGTTGCTGGTGAT
GCTAAGAACGATCCCCCCCAGGAAACTGAGGACTTCACCGCTCAAGTCATCATCCTTAAC
CACCCAGGTCAG------------------------------------------------
------------------------------------------------------------
------------------------------------------------------------
------------------------------------------------------------
---------------------------------------------------ATCCACGCT
GGATACGCACCAGTGCTCGATTGCCACACTGCCCACATCGCATGCAAGTTCACTGAGATC
ATCTCCAAA---------------------------------------------------
---------------------------------------GTCGATCGTAGAACAGGTGCT
GAGACTGAGTCTGCCCCCAAGAACATCAAGAACGGAGATGCTGCCATCGTCAGACTCACC
CCCTCCAAGCCCATGTGCGTTGA---------------------n--
>Dictydiaethalium_plumbeum_AMFD185_JX481325
------------------CATGTAGACGCCGGAAAGTCCACCACTACCGGTCACTTGATC
TACAAGTGCGGTGGTATCGACAAGAGGACCATCGAGAAGTTCGAGAAGGAAGCCTCTGAG
ATGGGTAAGGGTTCCTTCAAGTACGCCTGGGTGTTGGACAAACTCAAGGCAGAGCGTGAA
CGTGGTATTACCATCGACATTGCCTTGTGGAAGTTCGAGACCAACAAGTACTACTTCACC
ATCATTGATGCCCCA---------------------------------------------
------------------------------------------------------------
------------------------------------------------------GGACAT
CGTGACTTCATCAAGAACATGATCACTGGTACCTCCCAGGTAATTACCCTCATCAACCTG
CAATGTTCAAACATAGTTCATCACTCGCAAAACACATACACCAAACTTGCCTTCTCAGCT
CATTGCTAATCGCACATACA----------------------------------------
------------------------------------------------------------
------------------------------------------------------------
------------------------------------------------------------
------------------------------------------------------------
------------------------------------------------------------
------------------------------------------------------------
------------------------------------------------------------
------------------------------------------------------------
------------------------------------------------------------
---------------------------------------CAGGCTGATGCTGCCGTCTTA
GTCATTGCCACCCCCACTG-----------------------------------------
------------------------------------------------------------
----------------------------------------------GTGAGTTCGAGGCC
GGTATCGCAAAGAGCGGTCAGACCCGCGAGCACGCACTCCTTGCTTACACACTCGGTGTG
AAGCAGATGATTGTTGCCCTCAACAAGATGGATGACAAGTCCGTCAACTGGGCCCAGCCC
CGTTACGACGAGATCGTGAAGGAGATGTCTTCCTTCGTCAAGAAGATCGGTTACAACCCC
GAGAAGATCCCCTTCGTCCCCATCTCTGGATGGCACGGAGACAACATGTTGGAGAAGTCC
CCCAACCTCCCCTGGTACAAGGGACCCACACTCCTCGAGGCACTTGACGCCATCGTC---
------------------------------------------------------------
------------------------------------------------------------
---------------------GAGCCCAAGCGCCCGACCGACAAGCCCCTCCGTGTTCCC
CTCCAGGATGTGTACAAGATCGGAG-----------------------------------
------------------------------------------------------------
-------------------GTATTGGAACGGTTCCCGTCGGTCGTGTTGAGACTGGTATC
CTCAAGCCAGGAATGATTGTCACCTTCTCCCCCGCTAACTTGTCAACTGAAGTCAAGTCT
GTTGAGATGCACCACGTTGCTCTCCCTGAGGCCGTCCCAGGTGACAACGTTGGTTTCAAC
GTCAAGAACTTGTCCGTGAAG---------------------------------------
------------------------------------------------------------
------------------------------GATATTCGCCGTGGTATGGTGGCTGGTGAC
TCCAAGAACGATCCTCCCCAGGAAACTGAGGACTTCAACGCTCAGGTCATCATCCTCAAC
CACCCCGGTCAG------------------------------------------------
------------------------------------------------------------
------------------------------------------------------------
------------------------------------------------------------
---------------------------------------------------ATCCACGCC
GGATATGCCCCAGTGCTCGATTGCCACACTGCACACATTGCCTGCAAGTTCACTGAGATC
GTGTCCAAG---------------------------------------------------
---------------------------------------GTTGACCGTCGCTCTGGTCAG
GCAACTGAGGCTTCCCCCAAGAACATCAAGAACGGTGATGCCGCCATCGTCAGACTCACC
CCCTCCAAGCCCATGTGCGTTGAGTCCTTCGCTGACTACCCTCCCCTCGGTCGTTTTGCC
GTGCGTGATATGAG
>Dictydiaethalium_plumbeum_MM30150_JX481326
------------------------------------------------GGTCACTTGATC
TACAAGTGCGGTGGTATCGACAAGAGGACCATCGAGAAGTTCGAGAAGGAGGCCTCTGAG
ATGGGTAAGGGTTCCTTCAAGTACGCCTGGGTGTTGGACAAACTCAAGGCCGAGCGTGAA
CGTGGTATCACCATCGACATTGCCTTGTGGAAGTTCGAGACCAACAAGTACTACTTCACC
ATCATTGATGCCCCA---------------------------------------------
------------------------------------------------------------
------------------------------------------------------GGACAT
CGTGACTTCATCAAGAACATGATCACTGGTACCTCCCAGGTAAATATCCTCATAACCTGC
AATATTCAAACATAGCTTATCACTCGCCAAACACATATACTACAAACTTGCCTTCCCAGC
TCATTGCTAATCACTCATGCA---------------------------------------
------------------------------------------------------------
------------------------------------------------------------
------------------------------------------------------------
------------------------------------------------------------
------------------------------------------------------------
------------------------------------------------------------
------------------------------------------------------------
------------------------------------------------------------
------------------------------------------------------------
---------------------------------------CAGGCTGATGCCGCCGTCTTG
GTCATTGCCACCCCCACTG-----------------------------------------
------------------------------------------------------------
----------------------------------------------GTGAGTTCGAGGCC
GGTATCGCAAAGAGCGGTCAGACCCGCGAGCACGCACTCCTCGCTTACACACTCGGTGTG
AAGCAGATGATTGTTGCACTCAACAAGATGGACGACAAGTCCGTCAACTGGGCCCAGTCC
CGTTACGACGAGATCGTGAAGGAGATGTCTTCCTTCGTCAAGAAGATCGGTTACAACCCC
GAGAAGATCCCCTTCGTCCCCATCTCTGGATGGCACGGAGACAACATGTTGGAGAAGTCC
CCCAACCTCCCCTGGTACAAGGGACCCACACTTCTCGAGGCACTCGATGCCATCGTC---
------------------------------------------------------------
------------------------------------------------------------
---------------------GAGCCCAAGCGCCCGACCGACAAGCCCCTCCGTGTTCCC
CTCCAGGATGTGTACAAGATCGGAG-----------------------------------
------------------------------------------------------------
-------------------GTATCGGGACGGTTCCCGTCGGACGTGTTGAGACTGGTATC
CTCAAGCCAGGAATGATCGTCACCTTCTCCCCCGCTAACTTGTCAACTGAAGTTAAGTCT
GTTGAGATGCACCACGTTGCCCTCCCTGAGGCCGTCCCAGGTGACAACGTTGGTTTTAAC
GTCAAGAACTTGTCCGTGAAG---------------------------------------
------------------------------------------------------------
------------------------------GATATTCGCCGTGGTATGGTGGCTGGTGAC
TCTAAGAACGATCCTCCCCAGGAGACTGAGGACTTCAACGCTCAGGTCATCATCCTTAAC
CACCCCGGCCAG------------------------------------------------
------------------------------------------------------------
------------------------------------------------------------
------------------------------------------------------------
---------------------------------------------------ATCCACGCC
GGATATGCACCAGTGCTCGATTGCCACACTGCCCACATCGCCTGCAAGTTCACTGAGATC
GTGTCCAAG---------------------------------------------------
---------------------------------------GTCGACCGTCGCTCTGGTCAG
GCAACTGAGGCTTCCCCCAAGAACATCAAGAACGGTGATGCCGCCATCGTCAGACTCACC
CCCTCCAAGCCCATGTG---------------------------n--
>Hemitrichia_abietina_JX481327
---GAGCTCGTTATTGGCCATGTTGACGCCGGTAAGTCCACAACTACCGGGCACTTGATC
TACAAGTGCGGTGGTATTGACAAGAGGACCATCGAGAAGTTCGAGAAGGAGGCCTCTGAG
ATGGGTAAGGGGTCTTTCAAGTACGCATGGGTGTTGGACAAACTCAAGGCCGAGCGTGAA
CGTGGAATCACCATCGACATTGCCTTGTGGAAGTTCGAGACCAGCAAGTATTACTTCACC
ATTATCGATGCCCCA---------------------------------------------
------------------------------------------------------------
------------------------------------------------------GGACAT
CGTGACTTCATCAAGAACATGATTACTGGTACTTCCCAGGTATTTACTTGCATTCTGTTC
CCCGCAACGCGTTATTAACACAAACTTCACATTCGAATTGTGCTGCATTAAAAACCTGCG
CTAATTATATGTATACACTTT---------------------------------------
------------------------------------------------------------
------------------------------------------------------------
------------------------------------------------------------
------------------------------------------------------------
------------------------------------------------------------
------------------------------------------------------------
------------------------------------------------------------
------------------------------------------------------------
------------------------------------------------------------
---------------------------------------CAGGCCGATGCTGCCGTCTTG
GTCATTGCCTCCCCCACAG-----------------------------------------
------------------------------------------------------------
----------------------------------------------GAGAGTTCGAGGCA
GGTATCGCCAAGAGCGGACAGACTCGTGAGCACGCACTGCTCGCCTACACACTGGGTGTG
AAGCAGATGATCGTTGCCATCAACAAGATGGACGACAAATCCGTCAACTGGGGACAGGCC
CGTTACGATGAGATCGTGAAGGAAGTGTCTTCCTTCGTTAAGAAGATCGGTTACAACCCC
GAGAAGATCCCATTCGTCCCCATCTCCGGATGGCACGGAGACAACATGCTCGAGAAGTCC
TCCAACCTCCCATGGTACAAGGGACTCACTCTTCTCGAGGCACTCGACTCTGTCTCA---
------------------------------------------------------------
------------------------------------------------------------
---------------------GAGCCCAAGAGACCGACAGAGAAGCCCCTCCGCATTCCC
CTACAAGATGTGTACAAGATCGGAG-----------------------------------
------------------------------------------------------------
-------------------GTATTGGAACTGTGCCCGTAGGTCGTGTTGAGACTGGTGTC
CTCAAGCCAGGGATGAACGTTACGTTCTCCCCCGCTGGGTTGACCACTGAAGTTAAGTCT
GTTGAGATGCACCACGTCTCCCTCCCTGAGGCTGTGCCAGGCGACAACGTCGGTTTCAAC
GTCAAGAACTTGTCTGTCAAG---------------------------------------
------------------------------------------------------------
------------------------------GATATTCGTCGTGGTATGGTTGCTGGTGAT
GCCAAGAACGATCCCCCCCAAGAGACTGAGGACTTCAATGCCCAAGTCATTATCCTCAAC
CACCCCGGTCAG------------------------------------------------
------------------------------------------------------------
------------------------------------------------------------
------------------------------------------------------------
---------------------------------------------------ATCCACGCT
GGATACGCCCCGGTGCTCGACTGCCACACCGCCCACATCGCCTGTAAGTTCAGCGAGATC
CTCTCCAAG---------------------------------------------------
---------------------------------------GTCGACCGCCGCTCTGGACAA
GAGACAGAGGCTGCCCCCAAGAACATCAAGAACGGAGATGCCGCCATCGTTAGACTCACC
CCCTCCAAACCCATGTGCGTAGAATCTTTCTCTGACTACCCCCCTCTTGGACGTTTTGCC
GTCCGTGACATGCGTCAAACTGTAGCTGTCGGAATTCTG
>Hemitrichia_calyculata_JX481328
---------------------------------------------------------ATC
TACAAGTGCGGTGGTATTGATAAGAGAACCATCGAGAAGTTCGAGAAAGAGGCCTCTGAG
ATGGGCAAGGGCTCTTTCAAGTATGCATGGGTGTTGGACAAACTCAAGGCCGAACGTGAA
CGTGGTATTACCATCGATATTGCCTTGTGGAAGTTCGAAACCAGCAAATACTACTTCACT
ATCATTGATGCCCCA---------------------------------------------
------------------------------------------------------------
------------------------------------------------------GGCCAT
CGTGACTTTATTAAGAACATGATCACTGGTACCTCCCAGGTACGACATTTACTAGCACTA
CTGTTCATTACACTTTATTTATTTATTTTGTATCAACACATTATCAACGCATTTTTTATT
TTGTATCAACACATTTTTATTTTGTTAATCAACACATTTTTATTTTGATAATCAACACAC
TATTTTTTGTTAATCAACACATTATTTTTTTGTTAAGTACTAATAAATATTTTGCTTG--
------------------------------------------------------------
------------------------------------------------------------
------------------------------------------------------------
------------------------------------------------------------
------------------------------------------------------------
------------------------------------------------------------
------------------------------------------------------------
------------------------------------------------------------
---------------------------------------AAGGCTGATGCTGCTGTCTTA
GTTATTGCCTCCCCCACAG-----------------------------------------
------------------------------------------------------------
----------------------------------------------GAGAGTTCGAGGCC
GGTATTGCCAAGAACGGACAGACTCGTGAGCACGCACTCCTCGCCTACACACTCGGTGTG
AAGCAAATGATTGTAGCTATTAACAAGATGGACGACAAATCCGTCAACTGGGCACAATCT
CGCTATGATGAAATCGTTAAAGAGGTATCCTCTTTTGTCAAGAAGATTGGTTACAACCCC
GAGAAGATCCCCTTCGTACCCATTTCTGGATGGCATGGAGATAACATGCTCGAGAAGTCC
ACTAACCTCCCGTGGTACAAAGGTCTCACTTTACTTGAGGCTCTCGACAGTGTTTCA---
------------------------------------------------------------
------------------------------------------------------------
---------------------GAACCCAAAAGACCAACCGAAAAACCCCTTAGAATTCCA
CTCCAAGATGTTTACAAGATTGGAG-----------------------------------
------------------------------------------------------------
-------------------GTATTGGAACTGTCCCTGTAGGTCGTGTTGAGACTGGAGTC
CTCAAACCAGGAATGAACGTTACTTTCTCCCCTGCCGGTTTGACTACTGAAGTTAAATCT
GTTGAAATGCACCATGTATCCCTACCTGAGGCTGTACCAGGTGATAACGTCGGTTTTAAC
GTTAAGAATTTATCTGTCAAG---------------------------------------
------------------------------------------------------------
------------------------------GATATTCGTCGTGGTATGGTCGCTGGTGAT
GCCAAGAATGATCCCCCTCAAGAGACTGAAGATTTTAATGCCCAAGTTATTATCCTCAAT
CATCCTGGTCAG------------------------------------------------
------------------------------------------------------------
------------------------------------------------------------
------------------------------------------------------------
---------------------------------------------------ATTCATGCT
GGTTATGCCCCCGTATTGGATTGTCACACCGCCCATATCGCTTGTAAGTTCAGCGAGATT
CTCTCCAAG---------------------------------------------------
---------------------------------------GTAGATCGTAGATCTGGTCAA
GAGACTGAGGCTGCCCCTAAAAATATTAAGAACGGAGATGCCGCCATAGTTAAACTCACT
CCCTCCAAACCCATGTGTGTTGAGTCTTTCTCTGATTACCCACCTCTTGGTCGTTTTGCC
GTC
>Licea_castanea_JX481329
------------------------------------------------------------
n-----TGCGGTGGTATTGATACGAGGACCATCAAGAAGTTCGAGAAGGAAGCCTCTGAA
ATGGGCAAGGGTTCCTTCAAATACGCATGGGTGTTGGATAAACTTAAGGCCGAGCGTGAG
CGTGGAATTACCATCATTTCGGCATTGTGGAAGTTCGAGACCAACAAATACTATTTCACC
ATTATCGATGCCCCA---------------------------------------------
------------------------------------------------------------
------------------------------------------------------GGCCAT
CGTGACTTTATCAAGAACATGATTACTGGTACCTCCCAAGTATGTATCAGCATTTTAATT
TATTCACTCATACATAACTTCCATGATGTACTAACGCAATGCCTTG--------------
------------------------------------------------------------
------------------------------------------------------------
------------------------------------------------------------
------------------------------------------------------------
------------------------------------------------------------
------------------------------------------------------------
------------------------------------------------------------
------------------------------------------------------------
------------------------------------------------------------
------------------------------------------------------------
---------------------------------------TAGGCTGATGCTGCAGTATTG
GTTATCGCCTCTCCCACTG-----------------------------------------
------------------------------------------------------------
----------------------------------------------GTGAGTTCGAGGCA
GGTATTGCCAAGAGCGGTCAGACTCGCGAGCACGCCCTCCTTGCCTACACACTAGGTGTG
AAGCAAATGATCGTAGCCATCAACAAGATGGATGACAAGACTGTGTCCTGGAGCCAGTCC
CGTTACGATGAAATCGTCAAGGAAGTTTCCTCTTTCGTAAAGAAGATTGGATACAACCCT
GAGAAGATCCCCTTCGTCCCCATTTCTGGATGGCACGGAGATAACATGCTCGAGAAGTCC
GCCAACATTCCCTGGTACAAGGGACCCACTCTTCTTGAGGCACTCGACGCTGTATCA---
------------------------------------------------------------
------------------------------------------------------------
---------------------GAGCCTAAGAGACCAACTGAGAAGCCCCTCCGCATTCCC
CTACAAGATGTGTACAAGATCGGAG-----------------------------------
------------------------------------------------------------
-------------------GTATTGGAACTGTCCCTGTCGGTCGTGTGGAGACTGGTGTC
CTCAAGCCCGGAATGAACGTTACTTTCTCCCCCGCTGGTTTGACCACTGAAGTTAAGTCT
GTCGAGATGCACCACGTCTCTCTACCTGAGGCCCTCCCAGGAGATAACGTCGGTTTCAAC
GTTAAGAATTTGTCAGTTAAG---------------------------------------
------------------------------------------------------------
------------------------------GATATTCGCCGTGGTATGGTTGCTGGAGAT
GCTAAGAACGATCCCCCTCAAGAGACTGAGGATTTCAACGCTCAAGTTATCATTCTCAAC
CACCCTGGTACC------------------------------------------------
------------------------------------------------------------
------------------------------------------------------------
------------------------------------------------------------
---------------------------------------------------ATTCATGCT
GGTTATGCCCCAGTGCTCGATTGCCACACTGCCCACATCGCCTGTAAGTTCGCCGAGATC
TTGTCTAAG---------------------------------------------------
---------------------------------------GTCGATCGTCGTTCTGGTCAA
GAGACAGAGGCTGCTCCCAAAAACATCAAGAACGGAGATGCTGCCATTGTTAAACTTATT
CCTTCCAAGCCCATGTGCGTAGAATCATTCGCTGACTACCCA--n--
>Licea_marginata_JX481330
------------------------------------------------------TTGATC
TACAAGTGCGGTGGTATTGATAAGAGAACCATTGAGAAGTTCGAGAAGGAAGCCTCTGAA
ATGGGTAAAGGTTCTTTCAAGTACGCATGGGTCTTGGACAAACTCAAGGCTGAGCGTGAA
CGTGGAATCACTATCGATATTGCCTTGTGGAAGTTTGAGACCTCTAAATACTACTTCACC
ATTATCGACGCCCCA---------------------------------------------
------------------------------------------------------------
------------------------------------------------------GGACAT
CGTGATTTCATCAAGAACATGATTACTGGAACTTCCCAGGTAAGAATctggCAAACTTTT
CGCAWGYATACTTCTTTCGTTTCGCATTCCTATCTCTCTcttt-----------------
------------------------------------------------------------
------------------------------------------------------------
------------------------------------------------------------
------------------------------------------------------------
------------------------------------------------------------
------------------------------------------------------------
------------------------------------------------------------
------------------------------------------------------------
------------------------------------------------------------
------------------------------------------------------------
---------------------------------------CAGGCTGATGCTGCAGTTTTG
GTCATCGCCTCCCCCACTG-----------------------------------------
------------------------------------------------------------
----------------------------------------------GAGAGTTCGAAGCC
GGTATCGCCAAGAGCGGTCAGACTCGCGAGCACGCACTTCTTGCCTACACACTCGGTGTG
AGACAAATGATCGTTGCCATCAACAAGATGGATGATAAATCCACCAACTGGTCTCAAGCT
CGTTATGAAGAAATTGTGAAGGAAACTTCCTCTTTCGTCAAGAAGATCGGATATAACCCT
GAGAAGATTGCCTTCGTCCCAATCTCTGGATGGAACGGTGATAACATGTTAGAGAAGTCC
CCCAACATGGCCTGGTACAAGGGACCCACTCTTCTTGAGGCTCTTGATGCCGTCACT---
------------------------------------------------------------
------------------------------------------------------------
---------------------GAGCCAAAACGCCCAACTGAGAAGCCTCTCCGTGTCCCC
CTTCAAGACGTGTACAAGATTGGAG-----------------------------------
------------------------------------------------------------
-------------------GTATCGGAACTGTTCCCGTAGGTCGTGTTGAAACTGGTATC
CTCAAACCAGGAATGAACGTTACCTTCTCCCCCGCCAATATGACCACTGAAGTCAAGTCC
GTCGAAATGCATCACGTCGCTCTTCCTGAAGCTGGTCCCGGAGACAACGTCGGATTCAAC
GTTAAGAATTTGTCAGTAAAG---------------------------------------
------------------------------------------------------------
------------------------------GATATCCGTCGTGGTATGGTTGCTGGAGAT
GCCAAAAATGATCCTCCCCAAGAAACCGAAGATTTCAGCGCCCAAGTTATTATCCTCAAC
CACCCTGGACAA------------------------------------------------
------------------------------------------------------------
------------------------------------------------------------
------------------------------------------------------------
---------------------------------------------------ATCCACGCT
GGATACGCCCCAGTGCTCGATTGCCACACTGCTCACATTGCCTGCAAGTTCGCCGAGATT
TTATCCAAG---------------------------------------------------
---------------------------------------GTCGATCGTCGTACCGGACAG
GAGACCGAAGCTGCTCCCAAGAACATTAAGAACGGAGATTCTGCTATCGTCAAACTTGTC
CCCTCTAAACCCATGTGCGTTGAATCTTTCTCCGACTATCCTCCTCTTGGACGTTGTGCC
G
>Licea_parasitica_JX481331
------------------------------------------------GGTCACTTGATC
TACAAGTGCGGTGGTATCGACAAGAGGACCATCGAGAAGTTCGAGAAGGAAGCTCAGGAG
ATGGGTAAGGGTTCCTTCAAGTACGCATGGGTGTTGGACAAGCTCAAGGCCGAGCGTGAA
CGTGGTATTACCATCGACATTGCCTTGTGGAAGTTCGAGACCAACAAGTACTACTTCACC
ATCATTGATGCCCCA---------------------------------------------
------------------------------------------------------------
------------------------------------------------------GGACAC
CGTGACTTCATCAAGAATATGATTACTGGTACCTCCCAGGTACGCATATGCACTTCAAAT
TCATCTGTTTCTTTCAATTTCGAATGTTTTTGCATTTCTTACATCGTGTTGTATCATCTT
TCATTTTTTGTTGTTGTATGTGTTACTCGTTTGCTTCACAAGATGTTTACCATATCGTTA
------------------------------------------------------------
------------------------------------------------------------
------------------------------------------------------------
------------------------------------------------------------
------------------------------------------------------------
------------------------------------------------------------
------------------------------------------------------------
------------------------------------------------------------
------------------------------------------------------------
---------------------------------------TAGGCCGACGCTGCAGTTTTG
GTTATTGCCTCCCCCACTG-----------------------------------------
------------------------------------------------------------
----------------------------------------------GAGAGTTCGAAGCT
GGTATCGCTAAGAGCGGTCAGACCCGCGAGCACGCACTCCTTGCCTACACACTCGGTGTG
AAGCAGATGATCGTCGCTATCAACAAGATGGATGACAAGTCCGTCAACTGGGGTCAAGCC
CGTTACGACGAAATCGTCAAGGAGGTTTCATCGTTCGTCAAGAAGATTGGATACAACCCC
GAGAAGATCGCCTTCGTTCCCATTTCTGGATGGCACGGAGACAACATGCTCGAGAAGAGC
CCCAACATCCCCTGGTACAAGGGACTCACATTGCTCGAGGCACTCGACGCAGTTCAG---
------------------------------------------------------------
------------------------------------------------------------
---------------------GAGCCCAAGAGGCCGACCGAGAAGCCCCTCCGTGTCCCC
CTCCAGGACGTCTACAAGATCGGAG-----------------------------------
------------------------------------------------------------
-------------------GTATCGGAACGGTTCCCGTAGGTCGTGTGGAGACCGGTATC
CTCAAGCCCGGAATGAACGTCACTTTCTCCCCCGCTGGTTTGACTACTGAAGTCAAGTCC
GTCGAGATGCATCACGTGTCCCTCCCCGAGGCCGGCCCAGGTGACAACGTCGGTTTCAAC
GTCAAGAACTTGTCCGTCAAG---------------------------------------
------------------------------------------------------------
------------------------------GATATTCGCCGTGGTATGGTTGCTGGAGAT
GCCAAGAACGATCCCCCCCAGGAGACTGAGGACTTCAACGCCCAGGTCATCATCCTCAAC
CACCCTGGTCAG------------------------------------------------
------------------------------------------------------------
------------------------------------------------------------
------------------------------------------------------------
---------------------------------------------------ATCCACGCT
GGATATGCCCCAGTGCTCGACTGCCACACTGCCCACATCGCCTGTAAGTTCGCCGAGATC
GTTTCCAAG---------------------------------------------------
---------------------------------------GTCGACCGTCGTTCCGGACAG
GAGACTGAGGCTGCCCCCAAGAACATCAAGAACGGTGATGCCGCCATTGTCAGACTCGTC
CCCTCCAAGCCCATGTGCGTTGAGTCCTTCTCTGACTACCCTCCTCTCGGTCGTTTTGCC
G
>Licea_variabilis_JX481332
---------------------GTAGACGCCGGCAAGTCCACAACCACCGGTCACTTGATC
TACAAGTGCGGTGGTATTGACAAGAGGACTATTGAGAAGTTCGAGAAGGAAGCTTCCGAG
ATGGGCAAGGGTTCCTTCAAGTACGCATGGGTGTTGGATAAACTCAAGGCCGAGCGTGAG
CGTGGTATTACCATTGATATTGCCTTGTGGAAGTTCGAGACCAACAAGTACTACTTCACT
ATCATCGATGCCCCA---------------------------------------------
------------------------------------------------------------
------------------------------------------------------GGACAC
CGTGACTTCATTAAGAACATGATCACTGGTACCTCCCAGGTACTTATTAGCCAAACACTG
TACACATAAATCATACAATACTATTCACGCATTACATATTTTTTGCTCGTCTGCGATTGC
TAATTCCTCTTG------------------------------------------------
------------------------------------------------------------
------------------------------------------------------------
------------------------------------------------------------
------------------------------------------------------------
------------------------------------------------------------
------------------------------------------------------------
------------------------------------------------------------
------------------------------------------------------------
------------------------------------------------------------
---------------------------------------TAGGCAGATGCTGCAGTCTTG
GTCATCGCTTCCCCCACTG-----------------------------------------
------------------------------------------------------------
----------------------------------------------GTGAGTTCGAGGCT
GGTATTGCCAAGAACGGACAGACCCGTGAGCACGCACTCCTTGCCTACACACTCGGTGTG
AAGCAAATGATCGTTGCCATCAACAAGATGGACGACAAATCCGTGAACTGGGGACAGGCA
CGTTATGATGAAATCGTCAAGGAAGTCTCTTCGTTCGTTAAGAAGATTGGGTACAACCCC
GAGAAGATCCCCTTCGTCCCCATCTCTGGATGGCACGGAGACAACATGCTAGAGAAGTCT
CCCAACCTCTCATGGTACAAGGGACTCACACTTCTCGAGGCACTTGACGCAGTGTCA---
------------------------------------------------------------
------------------------------------------------------------
---------------------GAGCCTAAGAGACCAACTGAGAAGCCCCTCCGCATTCCC
CTTCAGGATGTGTACAAAATCGGAG-----------------------------------
------------------------------------------------------------
-------------------GTATTGGAACTGTCCCTGTAGGGCGTGTTGAGACTGGTGTT
CTTAAACCAGGCATGAACGTCACATTCTCTCCCGCTAACATGACCACTGAAGTTAAATCT
GTTGAGATGCACCACGTCTCCCTCCCTGAGGCTGTTCCAGGTGACAACGTCGGTTTCAAC
GTCAAGAACTTGTCTGTAAAG---------------------------------------
------------------------------------------------------------
------------------------------GATATTCGCCGTGGTATGGTTGCTGGTGAT
TCCAAGAACGACCCCCCACAAGAGACTGAGGACTTCAATGCCCAGGTCATCATCCTCAAC
CACCCTGGTCAG------------------------------------------------
------------------------------------------------------------
------------------------------------------------------------
------------------------------------------------------------
---------------------------------------------------ATCCACGCT
GGATATGCCCCAGTGCTCGATTGCCACACTGCCCACATTGCCTGCAAGTTCACTGAGATC
CTGTCCAAG---------------------------------------------------
---------------------------------------GTCGACCGTCGCTCTGGTCAA
GAGACTGAGGCTGCCCCCAAGAACATCAAGAACGGAGATGCTGCCATTGTTAGACTTACC
CCATCCAAACCCATGTGCGTTGAATCTTTCTCTGATTACCCCCCACTCGGACGTTTTGCT
GTCCGTGATATGAGACAAACTGTG
>Lindbladia_tubulina_JX481333
------------------------------------------------------------
n-----------------------------------------------GAAGCATCTGAG
ATGGGTAAGGGTTCGTTCAAGTACGCTTGGGCGTTGGACAAGCTCAAGGCTGAGCGTGAG
CGTGGTATTACCATTGATATCGCCTTGTGGAAGTTCGAAACCAACAAGTACTACTTCACC
ATCATTGATGCTCCA---------------------------------------------
------------------------------------------------------------
------------------------------------------------------GGACAC
CGTGACTTTATCAAGAACATGATCACGGGTACCTCTCAGGTAAGCTCACACTTCTTCTTT
CTTACCTGCCTTACTTCTTTCGATACACATTCAATCGATTCTATACCCTTATGTATCGAG
CTCAAAAGAAGCACTACCACACATACCTATGCTTCACTCGAGTATCTCATACAACGTAAG
TCATGCAATCGATTGTCACATGAGTATCGAAAGAGATACAGATCTTTACCACCGCACTAG
CACATCATATGATGACAGTTTGAGTTAGAGTACCTCTGGCTCAGCCTGCTCAGCTGCAGC
ATGTGTTGGTTCTATGGGGTATGGATTGCTCCCATGCAGACGAAGCATATGAACAAAGTC
GAAACAAGTATGCTTTTGTCTTATGGGACATAGATAGGTGGTAAGCTTCATGTTGTTGAT
TGTAGAGTTATACTTACTTTTTTTTTCCCTCTCTTCTCTCTTCCTTCTCCTCTTCTCTTC
CTTTCCTTCCCCTCTCCTCTCTCTCTCTCCTCTCTCCTTCCTTTTTATCTTCCTTTTTCT
TTTGTTTTTGTA------------------------------------------------
------------------------------------------------------------
------------------------------------------------------------
---------------------------------------TAGGCCGATGCTGCAGTTCTC
GTGATTGCTTCTCCTACTG-----------------------------------------
------------------------------------------------------------
----------------------------------------------GTGAGTTCGAGGCT
GGTATTGCCAAGAGCGGCCAGACCCGTGAACATGCCCTGCTCGCCTACACCTTGGGTGTG
AAGCAGATGATTGTTGCCATCAACAAGATGGATGAGAAGACCGTCAACTGGTCTCAAGCT
CGTTACGATGAAATCGTGAAGGAGGTGTCTTCTTTCGTGAAGAAGATCGGATACAACCCT
GAGAAGATCCCCTTCGTCCCCATCTCAGGCTGGAACGGAGACAACATGCTTGAGAAGTCG
GCCAACCTCCCATGGTACAAGGGTCCCACTCTCTTGGAAGCCCTCGATGCCGTGCAA---
------------------------------------------------------------
------------------------------------------------------------
---------------------GAGCCCAAGCGCCCATTAGACAAGCCCCTCCGTGTCCCC
CTTCAGGACGTCTACAAGATTGGAG-----------------------------------
------------------------------------------------------------
-------------------GTATTGGAACGGTCCCCGTAGGTCGTGTTGAGACTGGTATC
TTGAAGCCCGGTATGGTCGTCACTTTCTCCCCCGCCGGTATGACCACTGATGTCAAGTCC
GTCGAAATGCATCACGTTGCTCTCCAAGAGGCTGTTCCAGGAGACAACGTCGGTTTCAAC
GTCAAGAACTTGTCTGTCAAG---------------------------------------
------------------------------------------------------------
------------------------------GATATTCGTCGTGGTATGGTCGCTGGTGAC
TCTAAGAATGATCCTCCCCAAGAAACTGAGACCTTCGAGGCTCAAGTCATCATCCTCAAC
CACCCTGGACAAGTATGTTCTCTGACTTCCTCTTCCGTCCTCACTCTTCTCTCCCACTAC
CACTCCTCTCTCTTCTCTCCCATCATAACTCCTCCCTCTTCTCTCCCACTACCACTCCTC
TCTCTTCTCTCCCATCATAACTCCTCCCTCTTCTCTCCCCTATTCTATCATCACTCCTCT
CTCCCATCATCACTTCTCTTTCTTCTCTCCCCTCTCCCACCATCACCCTCTCTCTCCTTC
TCCCCCCTTCTCTATGAAAAATTGATACTGATAATTTCTTTCCTTTTTCAGATTCACGCT
GGATACGCACCAGTGTTGGATTGCCACACTGCCCACATTGCCTGTAAATTCACAGAACTC
CTCGAGAAG---------------------------------------------------
---------------------------------------GTGGACCGTCGTTCAGGCCAA
AAGCTCGAAGATGCACCCAAGAACGTCAAGAACGGAGACGCCGCCATGGTCCTCCTCACC
CCCTCCAAGCCCATGTGCGTGGAGTCCTTCACTGACTACCCCCCTCTTGGACGTTTTGCC
GTCCGTGATATGAGACAGACAGTGGCTG
>Lycogala_epidendrum_AMFD127_AY842142S1, S2
------------------------------------------------------TTGATT
TACAAATGCGGTGGTATCGACAAGAGAACCATTGAGAAGTTTGAGAAAGAAGCCACTGAG
ATGGGGAAAGGTTCTTTCAAATACGCGTGGGTGTTGGACAAACTCAAGGCTGAGCGTGAG
CGTGGAATTACCATTGATATCGCCTTGTGGAAGTTTGAGACTGCCAAGTACTACTTCACC
ATCATTGATGCCCCC---------------------------------------------
------------------------------------------------------------
------------------------------------------------------GGCCAT
CGTGATTTCATCAAGAACATGATTACTGGTACTTCTCAGGTATTGTATCTTATTCTTTAT
CCCGATCTCCTATCCCCCCAATCTCTTTCCCCCCCTTTTnnnnnnnnnnnnnn-------
------------------------------------------------------------
------------------------------------------------------------
------------------------------------------------------------
------------------------------------------------------------
------------------------------------------------------------
------------------------------------------------------------
------------------------------------------------------------
------------------------------------------------------------
------------------------------------------------------------
------------------------------------------------------------
------------------------------------------------------------
------------------------------------------------------------
------------------------------------------------------------
------------------------------------------------------------
-----------------nnnnnnnnnnGAACACGCCCTTCTCGCCTTCACCCTTGGTGTG
AGACAAATGATCGTCGCAATTAACAAGATGGACGACAAATCCGTCTCATGGAGCCAAGAC
CGTTACAACGAAATCGAAGAAAGAGCTTCGCATTTCCTTAAGAAGATTGGGTACAACCCT
GACAAAGTCCCCTTCGTCCCCATTTCTGGATGGAACGGTGATAACATGCTCGAGAAATCC
TCCAACCTCCCCTGGTACAAGGGCCCCACCCTCCTTGAAGCCCTCGACGGTGTTACT---
------------------------------------------------------------
------------------------------------------------------------
---------------------GAACCCAAGCGCCCAGTGGACAAACCCCTTCGTCTCCCC
CTTCAAGATGTGTACAAAATCGGAG-----------------------------------
------------------------------------------------------------
-------------------GTATTGGAACAGTCCCCGTCGGTCGTGTTGAAACTGGGGTC
ATCAAACCCGGTATGATCGTCACTTTCGCCCCCGCTGGACTCAGCACTGAAGTTAAATCT
GTTGAAATGCACCACGTAGCCATGGAGGAAGCCACCCCAGGAGACAACGTTGGTTTTAAC
GTTAAGAACTTATCCATCAAG---------------------------------------
------------------------------------------------------------
------------------------------GACATTCGTCGTGGTATGGTTGCCGGTGAC
TCTAAAAACGATCCCCCCCAAGAAACCGAAACCTTCGAGGCCCAAGTTATCATTCTCAAC
CACCCTGGTCAA------------------------------------------------
------------------------------------------------------------
------------------------------------------------------------
------------------------------------------------------------
---------------------------------------------------ATCCACGCT
GGATACGCACCCGTGCTCGATTGCCACACCGCCCACATCGCCTGTAAGTTCTCTGAGATC
TTGACCAAA---------------------------------------------------
---------------------------------------GTTGATCGTCGTAACGGAAAC
GTCATTGAGGAGTCCCCCAAGAACATCAAGAACGGAGATGCCGCTATCGTCCTCCTCACC
CCCTCCAAACCCATGTGCGTTGAGGTTTTCACCGAATACCCCCCTCTCGGCCGTTTTGCC
GTCCGTGATATGAGACAAACAC
>Lycogala_epidendrum_AMFD271_JX481334
--------------------------------------------------TCATTTGATC
TACAAATGCGGTGGTATCGACAAGAGAACCATTGAGAAGTTTGAGAAAGAAGCCACTGAG
ATGGGGAAAGGTTCTTTCAAATACGCGTGGGTGTTGGACAAACTCAAGGCTGAACGTGAG
CGTGGAATTACCATTGATATCGCCTTGTGGAAGTTTGAGACTGCCAAATACTACTTCACC
ATCATTGATGCCCCC---------------------------------------------
------------------------------------------------------------
------------------------------------------------------GGCCAT
CGTGATTTCATCAAGAACATGATTACTGGTACCTCTCAGGTATTGTATCTTATTCTTTAT
CCCGATCTCCCATCCCCCTCCTCCCCCACTTCCCCCCCCCGCGCCCCGCCTTTTTATGTG
TGTGTGTGAAATTTTTACCTTTTGACAAAAACCTCGTGAACCCCTCGGTCTAACTTTTAG
TTCTTTTGATTATCTATCTAAAAACACAGATAGATAATATCTTTATCTCCGATGCGCACA
CATAACTGGTCTGAAAACTACACGGGATGATCATCTTTACCACCCACGATCGATCCGCCA
AACCGACATTTGAAAAACATAGATCTAAATCCGAGATTTTTCAAAAAAAACATAGATCTA
AAAGACAGATTTACAGATTAAGATTCTCTGAAAAAATGATTGGTTTTGATTGATTTGGTC
AAATTTTGTAGATCGACAAAAATTTGGGTTAAAAATCCGCGTTGCGTTGGGGGCGAGTCA
GAGTCTTTCCGCCCACGATCGGGAGCAGAAAACTCAAAAATAGGCCAAAGTGGTCTATTT
TTGAAAAAATCAGCCCGGTTTTTGAGATCTACGAAGATCTGAGATAAACCCACTGCAAAA
AATTCCCATATAAGGATTTATTTTGCAAACAGATAATCGTAGATCTCAAAACCGGGCTGA
ATAGGCCATAATTGGTCCTATCTACGCGGTGAGACTTTTAGGGTGGTGTTTGTTATTGTG
AACCAATATTAATCTTTGCTCTTTCTTTTTATAATAATGTAGGCTGATGTTGCCGTCTTG
GTCATTGCCTCCCCCACAG-----------------------------------------
------------------------------------------------------------
----------------------------------------------GAGAGTTCGAAGCC
GGTATTGCCAAGAATGGACAAACCCGTGAACACGCCCTTCTCGCCTACACCCTCGGTGTG
AGACAAATGATCGTCGCAATTAACAAGATGGACGACAAATCCGTCTCATGGAGCGAAGAC
CGTTACAACGAAATCAAGAAAGAGCTTAGCGATTTCCTTAAGAAGATTGGGTACGCACCC
GACAAAGTCCCCTTCGTCCCCATTTCTGGATGGAACGGAGATAACATGCTCGAGAAATCC
TCCAACCTCCCCTGGTACAAGGGCCCCACCCTCCTTGAAGCCCTCGACGGTGTTACC---
------------------------------------------------------------
------------------------------------------------------------
---------------------GAACCCAAACGCCCAGTGGACAAACCCCTCCGTCTCCCC
CTTCAAGATGTGTACAAAATCGGAG-----------------------------------
------------------------------------------------------------
-------------------GTATTGGAACAGTCCCCGTCGGTCGTGTCGAAACTGGTGTC
ATCAAACCCGGTATGGTCGTCACTTTCGCCCCCGCTGGTCTCAGCACTGAAGTCAAATCT
GTTGAAATGCACCACGTAGCCATGGAGGAAGCCACCCCAGGAGACAACGTTGGTTTCAAC
GTCAAGAACTTGTCCATCAAA---------------------------------------
------------------------------------------------------------
------------------------------GACATTCGTCGTGGTATGGTTGCCGGTGAC
TCCAAAAACGATCCCCCCCAGGAAACCGAAACCTTCGAGGCCCAAGTTATCATCCTCAAC
CACCCCGGTCAA------------------------------------------------
------------------------------------------------------------
------------------------------------------------------------
------------------------------------------------------------
---------------------------------------------------ATCCACGCC
GGATACGCCCCCGTGCTCGATTGCCACACTGCCCACATCGCCTGTAAGTTCTCTGAGATC
TTGACCAAA---------------------------------------------------
---------------------------------------GTTGACCGTCGTAACGGTAAC
GTCATTGAAGAGACCCCCAAGAACATCAAGAACGGAGATGCCGCCATCGTCCTCCTCACC
CCCTCCAAACCCATGTGCGTTGAGGTTTTCACTGAATACCCCCCTCTCGGTCGTTTCCCC
GTCCGTG
>Metatrichia_vesparium_JX481335
---------------------------------AAGTCCACAACTACCGGACACTTGATC
TACAAGTGCGGTGGTATTGACAAGAGGACAATTGAGAAGTTCGAAAAGGAGGCATCTGAA
ATGGGCAAGGGATCATTCAAATACGCATGGGTGTTGGACAAACTCAAGGCTGAGCGTGAG
CGTGGTATTACCATCGACATTGCCTTGTGGAAGTTCGAAACCAACAAGTACTACTTTACC
ATTATTGATGCCCCA---------------------------------------------
------------------------------------------------------------
------------------------------------------------------GGACAC
CGTGACTTCATTAAGAATATGATTACTGGTACCTCCCAGGTAAGAGCCAACCATCACCCA
CTTCCCCACTACCACGCAAGCACTAACCAACCCCACT-----------------------
------------------------------------------------------------
------------------------------------------------------------
------------------------------------------------------------
------------------------------------------------------------
------------------------------------------------------------
------------------------------------------------------------
------------------------------------------------------------
------------------------------------------------------------
------------------------------------------------------------
------------------------------------------------------------
---------------------------------------CAGGCTGACGCCGCCGTGTTG
GTCATTGCCACCCCCACTG-----------------------------------------
------------------------------------------------------------
----------------------------------------------GTGAGTTCGAAGCC
GGTATTGCCAAGAACGGACAAACTCGTGAGCACGCACTTCTTGCCTTCACTCTCGGTGTG
AAGCAGATGATCGTTGCCCTCAACAAGATGGACGACAAATCCGTCAACTGGTCACAAGCC
CGTTATGACGAAATCGTAAAGGAAGTTTCTTCCTTCGTCAAGAAGATCGGATACAACCCC
GAGAAGATCCCCTTCGTCCCCATCTCTGGCTGGCACGGAGACAACATGTTGGAGAAGTCA
GCGAACCTCCCGTGGTACAAGGGTCCCACCCTCCTCGAGGCACTTGATGGTGTTTCA---
------------------------------------------------------------
------------------------------------------------------------
---------------------GAGCCCAAGAGACCGACTGAGAAGCCCCTCCGTGTTCCC
CTTCAGGATGTGTACAAGATTGGAG-----------------------------------
------------------------------------------------------------
-------------------GTATTGGAACTGTGCCCGTAGGTCGTGTTGAGACTGGTATC
CTCAAGCCAGGAATGAACGTCACTTTCTCCCCCGCTGGTTTAACTACTGAAGTCAAATCC
GTCGAGATGCACCACGTTGCCCTACCTGAGGCCGTCCCAGGAGACAACGTCGGTTTCAAC
GTAAAGAACCTGTCTGTCAAG---------------------------------------
------------------------------------------------------------
------------------------------GATATTCGCCGTGGTATGGTTGCTGGTGAT
GCCAAGAACGATCCCCCTCAAGAGACTGAAGACTTTAACGCCCAAGTTATCATCCTCAAC
CACCCCGGTCAG------------------------------------------------
------------------------------------------------------------
------------------------------------------------------------
------------------------------------------------------------
---------------------------------------------------ATCCACGCT
GGTTACGCACCAGTGCTCGATTGCCACACTGCCCACATCGCCTGTAAGTTCGCTGAGTTG
GTTTCCAAG---------------------------------------------------
---------------------------------------GTAGATCGCCGTTCTGGTCAA
GCCACTGAGGATGCCCCCAAGAACATTAAGAACGGAGATGCCGCCATCGTTAGGCTCGTT
CCCTCCAAGCCCATGTGCGTCGAGTCCTTCGCTGAGTACCCCCCTCTCGGCCGTTTTGCC
GTCCGTGATATG
>Oligonema_schweinitzii_JX481336
---------------------------------AAGTCCACAACTACCGGTCACTTGATC
TACAAGTGTGGTGGTATTGACAAGAGGACAATTGAGAAGTTCGAGAAGGAAGCTTCCGAA
ATGGGCAAGGGTTCCTTCAAGTATGCCTGGGTGTTGGACAAACTCAAGGCCGAGCGTGAG
CGTGGTATTACCATCGATATCGCCTTGTGGAAGTTCGAGACCAACAAGTACTATTTCACC
ATCATTGATGCCCCA---------------------------------------------
------------------------------------------------------------
------------------------------------------------------GGACAT
CGTGACTTCATCAAGAACATGATTACTGGTACCTCCCAGGTAAGATCACGCACACCACAA
CCATATGAACCCCAAACTCACTTTGTACCAC-----------------------------
------------------------------------------------------------
------------------------------------------------------------
------------------------------------------------------------
------------------------------------------------------------
------------------------------------------------------------
------------------------------------------------------------
------------------------------------------------------------
------------------------------------------------------------
------------------------------------------------------------
------------------------------------------------------------
---------------------------------------CAGGCTGATGCTGCTGTGTTG
GTTATTGCCACCCCCACTG-----------------------------------------
------------------------------------------------------------
----------------------------------------------GTGAGTTCGAGGCA
GGTATTGCTAAGAACGGACAGACTCGTGAGCACGCCCTCCTTGCCTACACCCTTGGTGTG
AAGCAAATGATCGTTGCCCTCAACAAGATGGATGACAAATCCGTTAACTGGGGTCAAGCT
CGTTATGACGAAATCGTCAAGGAAGTATCTTCCTTCGTCAAGAAGATCGGATACAACCCC
GAGAAGATTCCTTTCGTACCCATTTCTGGATGGCACGGAGACAACATGTTGGAGAAGTCC
GCCAACCTCCCATGGTACAAGGGCCCCACCCTCCTCGAGGCACTCGACGCTGTTCAA---
------------------------------------------------------------
------------------------------------------------------------
---------------------GAGCCCAAGAGACCGACTGAGAAGCCCCTCCGCATCCCC
CTTCAGGATGTTTACAAAATCGGAG-----------------------------------
------------------------------------------------------------
-------------------GTATTGGAACTGTGCCCGTAGGTCGTGTTGAGACTGGTGTC
CTCAAGCCAGGAATGAACGTCACTTTCTCCCCCGCTGGTTTGACCACTGAAGTCAAGTCT
GTCGAGATGCACCACGTAGCTCTCCCTGAGGCCGTCCCAGGAGACAATGTTGGTTTCAAC
GTTAAGAATTTGTCTGTTAAG---------------------------------------
------------------------------------------------------------
------------------------------GATATTCGTCGTGGTATGGTTGCTGGTGAT
GCGAAGAACGATCCCCCCCAAGAGACTGAGGACTTCAACGCCCAAGTTATCATCTTGAAC
CACCCTGGTCAG------------------------------------------------
------------------------------------------------------------
------------------------------------------------------------
------------------------------------------------------------
---------------------------------------------------ATCCACGCT
GGATATGCACCAGTGCTCGATTGCCACACTGCCCACATTGCCTGTAAATTCGCAGAGCTT
GTTTCCAAG---------------------------------------------------
---------------------------------------GTAGATCGTCGTTCTGGACAA
GCCACTGAGGAGACCCCCAAGAACATCAAGAACGGAGACGCTGCCATCGTTAGACTTGTA
CCCTCCAAGCCCATGTGCGTTGAATCTTTCGCCGAGTACCCTCCTCTTGG
>Perichaena_corticalis_JX481337
---------------------------GCTGGTAAGTCCACCACCACTGGTCACTTGATC
TATAAGTGCGGTGGTATTGACAAGAGGACTATTGAGAAGTTCGAGAAGGAAGCATCTGAA
ATGGGTAAGGGCTCCTTCAAGTACGCATGGGTGTTGGACAAACTCAAGGCCGAGCGTGAG
CGTGGTATCACCATCGATATCGCCTTGTGGAAATTCGAGACCAACAAGTACTATTTCACT
ATCATTGATGCCCCA---------------------------------------------
------------------------------------------------------------
------------------------------------------------------GGACAC
CGCGACTTTATCAAGAATATGATTACTGGTACCTCCCAGGTAACACAAACACTCACTCGC
CCTTCCGCCTGAACTTGTGCTGACTCGCAATTT---------------------------
------------------------------------------------------------
------------------------------------------------------------
------------------------------------------------------------
------------------------------------------------------------
------------------------------------------------------------
------------------------------------------------------------
------------------------------------------------------------
------------------------------------------------------------
------------------------------------------------------------
------------------------------------------------------------
---------------------------------------CAGGCTGATGCTGCCGTCTTG
GTCATTGCCACACCCACAG-----------------------------------------
------------------------------------------------------------
----------------------------------------------GTGAGTTCGAGGCT
GGTATTGCCAAGAACGGGCAGACTCGTGAGCACGCACTTCTTGCTTACACACTCGGTGTG
AAGCAAATGATTGTAGCCCTCAACAAGATGGATGACAAATCCGTCAACTGGGCTCAAAGC
CGTTATGACGAAATTGTTAAGGAAGTGTCATCCTTCGTCAAAAAGATCGGATACAATCCT
GAGAAGATCCCCTTCGTACCCATTTCTGGATGGCACGGAGATAACATGCTGGAGAAGTCC
CCCAACCTTCCTTGGTACAAGGGTCCCACCCTTCTTGAGGCACTAGATGCTGTCTCC---
------------------------------------------------------------
------------------------------------------------------------
---------------------GAACCCAAGAGACCAACTGAGAAGCCCCTCCGTATCCCT
CTCCAAGACGTCTACAAGATTGGAG-----------------------------------
------------------------------------------------------------
-------------------GTATCGGAACTGTTCCTGTTGGTCGTGTTGAAACTGGTGTC
CTCAAGCCTGGAATGAACGTTACCTTCTCTCCCGCTGGATTAACCACTGAAGTTAAATCT
GTAGAGATGCACCATGTTGCCTTACCTGAGGCTCTCCCAGGAGATAATGTGGGTTTCAAT
GTCAAGAACTTGTCTGTCAAG---------------------------------------
------------------------------------------------------------
------------------------------GATATTCGCCGTGGTATGGTTGCTGGTGAT
GCAAAGAACGACCCTCCTCAGGAGACTGAAGACTTCAACGCTCAAGTGATCATCCTTAAC
CACCCTGGTCAA------------------------------------------------
------------------------------------------------------------
------------------------------------------------------------
------------------------------------------------------------
---------------------------------------------------ATTCATGCT
GGTTACGCTCCTGTGCTCGATTGTCACACTGCCCACATCGCTTGTAAGTTCGCTGAATTA
GTTTCTAAG---------------------------------------------------
---------------------------------------GTAGATCGTCGCTCTGGGCAA
GCCACAGAAGAAGCCCCCAAGAACATCAAGAACGGAGATGCTGCCATTGTGAGACTCGTT
CCTTCCAAGCCAATGTCTGTTGAATCCT----------------n--
>Prototrichia_metallica_JX481338
------------------------------------------ACCACTGGTCACTTGATT
TACAAGTGCGGTGGTATTGATAAGAGAACCATCGAAAAGTTCGAGAAGGAAGCTTCCGAA
ATGGGCAAGGGTTCCTTCAAATACGCATGGGTGTTGGACAAACTCAAGGCTGAGCGTGAG
CGTGGTATTACCATCGATATTGCCTTGTGGAAGTTCGAGACCCAGAAGTACTATTTCACC
ATCATTGACGCCCCA---------------------------------------------
------------------------------------------------------------
------------------------------------------------------GGGCAC
CGTGACTTCATCAAGAACATGATCACTGGTACCTCTCAGGTAGGACATTTTACTCTATTA
GACTTACGCATGCATTTGCCATTCATTTTTTCAAAATATATTTTACTCGACCTTAGCTAA
CTCACTTTTACCTCG---------------------------------------------
------------------------------------------------------------
------------------------------------------------------------
------------------------------------------------------------
------------------------------------------------------------
------------------------------------------------------------
------------------------------------------------------------
------------------------------------------------------------
------------------------------------------------------------
------------------------------------------------------------
---------------------------------------CAGGCTGATGCTGCAGTCTTG
GTCATTGCCTCCCCCACTG-----------------------------------------
------------------------------------------------------------
----------------------------------------------GTGAGTTCGAAGCC
GGTATTGCCAAGAGCGGACAGACTCGTGAGCACGCACTCCTCGCCTACACACTCGGTGTG
AAGCAGATGATCGTTGCCATTAACAAGATGGACGACAAATCCGTTAACTGGGGCCAAGCA
CGTTACGATGAGATCGTGAAGGAAGTCTCTTCCTTCGTCAAAAAGATCGGGTACAACCCT
GAGAAGATCCCCTTCGTCCCCATCTCTGGATGGCACGGAGACAACATGCTCGAGAAGTCC
CCCAACCTCGCATGGTACAAAGGTTTGACCCTCCTCGAGGCCCTCGATTCCGTAACT---
------------------------------------------------------------
------------------------------------------------------------
---------------------GAGCCCAAGAGACCAACCGAAAAGCCTCTACGTATCCCC
CTACAAGATGTGTACAAGATCGGAG-----------------------------------
------------------------------------------------------------
-------------------GTATCGGAACTGTCCCCGTCGGACGTGTTGAGACTGGAATC
CTCAAGCCAGGAATGAACGTCACTTTCTCCCCCGCCAACATGACCACTGAAGTTAAGTCC
GTCGAAATGCACCACGTCTCCCTCCCTGAGGCTGGCCCAGGAGACAACGTTGGTTTCAAC
GTGAAGAACTTGTCCGTCAAG---------------------------------------
------------------------------------------------------------
------------------------------GATATCCGTCGTGGTATGGTTGCTGGTGAC
TCCAAGAACGATCCTCCCCAGGAAACTGAGGACTTCAACGCTCAAGTCATCATCCTCAAC
CACCCCGGTCAG------------------------------------------------
------------------------------------------------------------
------------------------------------------------------------
------------------------------------------------------------
---------------------------------------------------ATCCACGCT
GGATACGCACCGGTGCTCGATTGCCACACTGCCCACATCGCCTGTAAATTCACTGAGATC
TTGTCCAAG---------------------------------------------------
---------------------------------------GTAGATCGCCGTTCTGGACAG
GAGACTGAGTCTGCACCCAAGAACATCAAGAACGGAGACGCAGCTATCGTTAGACTTACC
CCCTCTAAACCCATGTGTGTTGAGTCCTTCTCCGACTACCCC--n--
>Reticularia_jurana_JX481339
------------------------------------------------------------
n-----TGTGGTGGGATTGATAAGAGAACCATTGAGAAGTTCGAGAAGGAAGCCTCTGAA
ATGGGGAAAGGTTCGTTCAAATATGCGTGGGTATTAGATAAACTCAAGGCTGAACGTGAG
CGTGGTATTACCATCGATATCGCCTTGTGGAAGTTCGAGACCAACAAATATTACTTCACC
ATTATTGATGCCCCA---------------------------------------------
------------------------------------------------------------
------------------------------------------------------GGCCAT
CGTGACTTTATCAAGAACATGATTACCGGTACTTCCCAGGTAAATAACCATTTTCCTTTT
TACCCCCCCGCTCTCTTATGTGTTTTTTCGCTCTTTGTGCGCGCTTTATTTGTCATGTTG
CGCTTTATTTCCCCCCTTTCTTCCCYCGCACACACAYATMWCACMCMYWTTTYKCSYMTW
TTGTRYRMGWKTTWYRYGTKWWAAARAKATWTTTWWTAGGCSCAAGTTTCGCGCGWCTTT
AAAAGTTAAGCTTAAAAGATATTCTTTTTTTGTCTCTGTTGGATGCCGCGCGAATCGCTA
TTTTATCCGTWCGCCCATCTAAAATAATTGCCCTTTAAATRSTTTAAATCTTTCTTRTTC
GTGTTTAAATCTGTTTTAATTCTGATTTTTCTAAAACAA---------------------
------------------------------------------------------------
------------------------------------------------------------
------------------------------------------------------------
------------------------------------------------------------
------------------------------------------------------------
---------------------------------------TAGGCTGATGCTGCCGTCTTG
GTCATTGCCTCACCCACTG-----------------------------------------
------------------------------------------------------------
----------------------------------------------GTGAGTTCGAGGCC
GGTATTGCCAAGAATGGACAGACCCGCGAGCACGCCCTCCTTGCGTACACACTCGGTGTG
AAGCAAATGATCGTCGCAATTAACAAGATGGATGATAAATCCGTGAACTGGTCCAAGGAT
CGTTATGACGAAATCGTAAAGGAAGTCTCCTCTTTCGTTAAGAAGATTGGTTACAATCCC
GAAAAAATCCCCTTCGTCCCAATTTCTGGATGGCACGGAGACAACATGTTAGAGAAATCT
ACAAATCTCCCCTGGTACAAGGGCCCCACCCTCCTCGAAGCCCTCGACGCCGTTTCA---
------------------------------------------------------------
------------------------------------------------------------
---------------------GAACCCAAGAGACCAACTGAGAAGCCCCTTCGTATCCCC
CTTCAAGATGTGTACAAGATTGGAG-----------------------------------
------------------------------------------------------------
-------------------GTATAGGAACTGTCCCAGTCGGCCGTGTTGAGACTGGTATT
CTCAAACCCGGTATGATGGTCACTTTCTCCCCCGCCAACCAAACCACTGAAGTTAAGTCT
GTCGAAATGCACCACGTCGCTCTCCCTGAAGCCCTCCCAGGTGATAACGTCGGTTTCAAC
GTCAAGAACTTGTCCGTGAAA---------------------------------------
------------------------------------------------------------
------------------------------GATATTCGCCGTGGTATGGTCGCTGGTGAT
GCTAAAAACGATCCCCCCCAAGAAACTGAAGATTTCAACGCCCAAGTTATTATCCTTAAC
CACCCTGGTCAA------------------------------------------------
------------------------------------------------------------
------------------------------------------------------------
------------------------------------------------------------
---------------------------------------------------ATCCACGCC
GGTTACGCCCCAGTGTTAGATTGCCACACTGCCCACATCGCTTGTAAGTTCAGCGAGATT
ATTTCCAAA---------------------------------------------------
---------------------------------------GTAGATCGTCGTTCTGGTCAG
GAAACTGAGGCTGCCCCCAAGAACATTAAGAACGGAGATGCTGCGATCGTCAAGTTAATT
CCCTCCAAACCCATGTGTGTCGAGTCCTTCGCCGATTACCCACCTTTGG
>Reticularia_lycoperdon_JX481340
---------------------------------------ACCACTACCGGTCACTTAATC
TACAAATGCGGTGGGATTGATAAGAGAACTATTGAGAAGTTCGAGAAGGAGGCCTCTGAA
ATGGGGAAAGGTTCCTTCAAGTATGCGTGGGTGTTAGATAAACTCAAGGCCGAACGTGAG
CGTGGTATTACTATTGATATCGCCTTGTGGAAATTCGAGACCAACAAATACTATTTCACC
ATCATTGATGCCCCA---------------------------------------------
------------------------------------------------------------
------------------------------------------------------GGACAT
CGTGACTTTATCAAGAACATGATTACTGGTACTTCCCAGGTATTTAAACATTTCACACTT
TATTTATGTGTTTGCCCCATCCCTCCAAATTTAACGCGCTTCCTATAACTTTTTTCGTTT
ATTTAGTATGTGGCGCGCGCGTTCGTTCCGTGTGTTTTTGGTATTTTTGTTGTGTTGCGC
GCGCGTATAAATTCTGACTTTATTTTGATGCCCCTTTTTAAACGAGTTCTAATTTATCTC
TATTTTTGTTTTAAA---------------------------------------------
------------------------------------------------------------
------------------------------------------------------------
------------------------------------------------------------
------------------------------------------------------------
------------------------------------------------------------
------------------------------------------------------------
------------------------------------------------------------
---------------------------------------CAGGCTGATGCTGCCGTCTTG
GTCATTGCCTCACCCACTG-----------------------------------------
------------------------------------------------------------
----------------------------------------------GTGAGTTCGAGGCC
GGTATTGCCAAGAATGGACAGACCCGCGAGCACGCCCTCCTTGCGTACACCCTCGGTGTG
AAACAAATGATCGTCGCAATCAACAAGATGGATGATAAATCTGTCAACTGGGGTAAGGAT
CGTTATGACGAAATCGTCAAGGAAGTATCTTCCTTCGTCAAGAAGATTGGGTACAACCCC
GAGAAAATTCCCTTCGTCCCCATTTCTGGATGGCACGGAGACAACATGTTAGAGAAGTCC
ACAAATCTCTCATGGTACAAGGGACCCACTTTACTCGAGGCGTTAGATGCGGTTTCA---
------------------------------------------------------------
------------------------------------------------------------
---------------------GAGCCCAAGAGACCAACTGAGAAGCCCCTTCGTATCCCC
CTTCAAGATGTGTACAAGATTGGAG-----------------------------------
------------------------------------------------------------
-------------------GTATAGGAACTGTCCCAGTCGGCCGTGTTGAGACTGGTATT
CTCAAACCCGGAATGATGGTCACTTTCTCCCCCGCCAACCAAACCACTGAAGTTAAATCT
GTTGAAATGCACCACGTCGCCCTCCCTGAAGCCTTACCAGGTGATAACGTCGGTTTTAAC
GTAAAGAACTTGTCCGTGAAA---------------------------------------
------------------------------------------------------------
------------------------------GATATTCGTCGTGGTATGGTCGCCGGTGAT
TCCAAAAACGATCCCCCCCAAGAAACTGAAGATTTCAATGCCCAAGTTATTATTCTTAAC
CACCCCGGTCAA------------------------------------------------
------------------------------------------------------------
------------------------------------------------------------
------------------------------------------------------------
---------------------------------------------------ATCCACGCC
GGTTATGCCCCAGTGTTAGATTGCCACACCGCCCACATCGCGTGTAAGTTCAGCGAGATC
ATCTCTAAA---------------------------------------------------
---------------------------------------GTAGATCGTCGTTCTGGTCAA
GAAACCGAGGCTGCCCCCAAGAACATTAAGAACGGAGATGCTGCGATCGTCAAGTTAGTT
CCCTCCAAACCCATGTGCGTTGAGTCCTTCGCCGATTACCCACCTTTGGGTCGTTTCGCC
GTCCGTGA
>Trichia_alpina_JX481341
------------------------------------------------------TTGATC
TACAAGTGCGGTGGTATCGACAAGAGAACCATGCAGAAGTACGAGAAGGAGGCATCTGAG
ATGGGCAAGGGTTCATTCAAGTACGCATGGGTGTTGGACAAACTCAAGGCTGAGCGCGAG
CGTGGGATTACCATAGACATCGCCTTGTGGAAGTTCGAGACCCTCAAGTACTATTTTACC
ATTATTGATGCCCCA---------------------------------------------
------------------------------------------------------------
------------------------------------------------------GGACAT
CGTGATTTCATAAAGAATATGATTACTGGTACTTCTCAGGTAGCTATCCCCGTTTCACAC
AAACACTGCTAACTTACCCT----------------------------------------
------------------------------------------------------------
------------------------------------------------------------
------------------------------------------------------------
------------------------------------------------------------
------------------------------------------------------------
------------------------------------------------------------
------------------------------------------------------------
------------------------------------------------------------
------------------------------------------------------------
------------------------------------------------------------
---------------------------------------CAGGCTGATGTTGCTGTATTG
GTAATTGCTACCCCCACTG-----------------------------------------
------------------------------------------------------------
----------------------------------------------GTGAGTTTGAGGCT
GGTATTGCTAAGAACGGACAGACTCGTGAACACGCACTTCTTGCATTCACTCTTGGGGTC
AGGCAGTTGATTGTTGTCCTCAACAAGATGGATGACAAATCCGTTAATTGGAGCATTGCC
CGTTATGACGAAATCGTCAAGGAAGTATCTTCTTTCATCAAGAAGATAGGTTACAACCCT
GAGAAGGTTCCCTTTGTACCCATCTCTGGATGGCACGGAGACAATATGTTGGAGAAGTCC
CCCAACCTCGCATGGTACAAGGGGTTTACCCTTCTTGAGGCACTTGACAACGTATCA---
------------------------------------------------------------
------------------------------------------------------------
---------------------GAACCCAAAAGACCAACTGAGAAGCCCCTTCGTATCCCC
CTCCAAGATGTCTACAAAATCGGAG-----------------------------------
------------------------------------------------------------
-------------------GTATTGGAACTGTGCCCGTAGGTCGTGTTGAGACTGGTATC
CTCAAGCCAGGAATGAACGTAACGTTCTCTCCTGCCAACTTGACCACTGAAGTCAAGTCT
GTTGAGATGCATCACGTGGCCCTCCCCGAGGCTGGCCCAGGAGACAATGTTGGATTCAAC
GTAAAGAACTTGTCTGTCAAG---------------------------------------
------------------------------------------------------------
------------------------------GATATCCGTCGTGGTATGGTTGCTGGTGAC
TCCAAAAACGATCCTCCTCAAGAGACTGAAGACTTCAACGCCCAGGTCATCATTTTGAAC
CACCCCGGTCAG------------------------------------------------
------------------------------------------------------------
------------------------------------------------------------
------------------------------------------------------------
---------------------------------------------------ATCCATGCA
GGATATGCGCCAGTGCTCGATTGCCACACTGCCCACATTGCCTGTAAATTCGCTGAACTC
GTTTCCAAA---------------------------------------------------
---------------------------------------GTTGATCGTCGTTCTGGACAA
GCTACAGAGGATGCCCCCAAGAACATCAAGAACGGAGATGCTGCTATTGTCAGACTTGTT
CCCTCTAAGCCCATGTGCGTAGAGTCCTTCTCTGACTATCCTCCTCTCGGTCGTTTTGCC
G
>Trichia_decipiens_JX481342
---------------------------------AAGTCCACAACTACCGGTCACTTGATT
TACAAGTGCGGTGGTATTGACAAGAGAACCATCGAGAAGTTCGAGAAGGAGGCCTCTGAG
ATGGGCAAGGGATCTTTCAAGTACGCATGGGTGTTGGACAAACTCAAGGCTGAGCGTGAA
CGTGGTATCACCATCGATATTGCCTTGTGGAAGTTCGAGACCAACAAGTACTACTTCACC
ATCATCGACGCCCCA---------------------------------------------
------------------------------------------------------------
------------------------------------------------------GGGCAT
CGTGACTTTATTAAGAACATGATTACTGGTACCTCCCAGGTACTACCACACACCCATGCA
CCATGTGTAACTTTCAGCGCACATTGCAAAATTTACCCTCGCATTGTGCTGATGTAATAA
CCTGCGCTAATAATACGCTTT---------------------------------------
------------------------------------------------------------
------------------------------------------------------------
------------------------------------------------------------
------------------------------------------------------------
------------------------------------------------------------
------------------------------------------------------------
------------------------------------------------------------
------------------------------------------------------------
------------------------------------------------------------
---------------------------------------CAGGCCGATGCTGCCGTCTTG
GTCATTGCCTCCCCCACAG-----------------------------------------
------------------------------------------------------------
----------------------------------------------GAGAGTTCGAGGCC
GGTATTGCCAAGAGCGGACAGACTCGTGAGCACGCACTTCTTGCATACACACTCGGTGTG
AAGCAGATGATTGTTGCAATCAACAAGATGGACGACAAATCCGTCAACTGGGCACAAGCA
CGTTACGACGAAATCGTCAAGGAAGTTTCCTCTTTCGTAAAGAAGATTGGTTACAACCCT
GAGAAGATCCCCTTCGTTCCCATTTCTGGATGGCACGGAGACAACATGCTCGAGAAGTCC
CCCAATCTCGCATGGTACAAGGGCCTCACTTTGCTCGAAGCGCTCGACTCTGTATCT---
------------------------------------------------------------
------------------------------------------------------------
---------------------GAGCCCAAGAGACCGACCGAGAAGCCCCTCCGCATTCCC
TTACAGGATGTGTACAAGATTGGAG-----------------------------------
------------------------------------------------------------
-------------------GTATTGGAACTGTGCCAGTAGGTCGTGTTGAGACTGGTGTC
CTCAAGCCAGGAATGAACGTTACCTTCTCCCCCGCTGGTTTGACCACTGAAGTTAAGTCT
GTTGAAATGCACCACGTCGCCCTCCCTGAGGCCCTCCCAGGAGACAATGTAGGTTTCAAC
GTCAAGAACTTGTCTGTCAAG---------------------------------------
------------------------------------------------------------
------------------------------GATATTCGCCGTGGTATGGTTGCTGGTGAT
GCCAAGAACGATCCCCCTCAGGAGACTGAGGACTTCAACGCCCAAGTTATCATCCTCAAC
CACCCTGGTCAG------------------------------------------------
------------------------------------------------------------
------------------------------------------------------------
------------------------------------------------------------
---------------------------------------------------ATCCATGCT
GGATACGCCCCAGTGCTCGACTGTCACACTGCCCACATCGCCTGCAAGTTCACCGAGCTC
CTCTCCAAG---------------------------------------------------
---------------------------------------GTCGATCGTCGTTCTGGCCAA
GCCACTGAGGATGCCCCCAAGAACATCAAGAACGGAGATGCCGCCATCGTCAGACTCATC
CCCTCCAAGCCCATGTGCGTAGAATCTTTCTCTGACTATCCCCCTCTCGGTCGTTTTGCC
GTCCGTGA
>Trichia_persimilis_AY643821
------------------------------------TTCAC-ACCACTGGTCACTTGATC
TACAAGTGTGGTGGTATTGACAAGAGGACAATTGAGAAGTTCGAGAAGGAAGCTTCCGAA
ATGGGCAAGGGTTCCTTCAAGTATGCCTGGGTGTTGGACAAACTCAAGGCCGAGCGTGAG
CGTGGTATTACCATCGATATCGCCTTGTGGAAGTTCGAGACCAACAAGTACTATTTCACC
ATCATTGATGCCCCA---------------------------------------------
------------------------------------------------------------
------------------------------------------------------GGACAT
CGTGACTTCATCAAGAACATGATTACTGGTACCTCCCAGGTAAAATCACGCGCACTGCCA
CCCTATGAACCCCAAACTCACTTTGTTACCAC----------------------------
------------------------------------------------------------
------------------------------------------------------------
------------------------------------------------------------
------------------------------------------------------------
------------------------------------------------------------
------------------------------------------------------------
------------------------------------------------------------
------------------------------------------------------------
------------------------------------------------------------
------------------------------------------------------------
---------------------------------------CAGGCTGATGCTGCTGTGTTG
GTTATTGCCACCCCCACTG-----------------------------------------
------------------------------------------------------------
----------------------------------------------GTGAGTTCGAGGCA
GGTATTGCTAAGAACGGACAGACTCGTGAGCACGCCCTCCTTGCCTACACCCTTGGTGTG
AAGCAAATGATCGTTGCCCTCAACAAGATGGATGACAAATCCGTTAACTGGGGACAAGCT
CGTTATGACGAAATCGTCAAGGAAGTATCTTCTTTCGTAAAGAAGATCGGATACAACCCC
GAGAAGATTCCTTTCGTACCCATTTCTGGATGGCACGGAGACAACATGTTGGAGAAGTCC
GCCAACCTCCCATGGTACAAGGGCCCCACCCTCCTCGAGGCACTCGACGCTGTTCAA---
------------------------------------------------------------
------------------------------------------------------------
---------------------GAGCCCAAGAGACCGACTGAGAAGCCCCTCCGCATCCCT
CTTCAGGATGTTTACAAAATCGGAG-----------------------------------
------------------------------------------------------------
-------------------GTATTGGAACTGTGCCCGTAGGTCGTGTTGAGACTGGTGTC
CTCAAGCCAGGAATGAACGTCACTTTCTCTCCCGCTGGTTTGACCACTGAAGTCAAGTCT
GTCGAGATGCACCACGTAGCTCTCCCTGAGGCCCTCCCAGGAGACAATGTTGGTTTCAAC
GTTAAGAATTTGTCTGTTAAG---------------------------------------
------------------------------------------------------------
------------------------------GATATTCGTCGTGGTATGGTTGCTGGTGAT
GCCAAGAACGATCCCCCCCAAGAGACTGAGGATTTCAACGCCCAAGTTATCATCTTGAAC
CACCCCGGACAG------------------------------------------------
------------------------------------------------------------
------------------------------------------------------------
------------------------------------------------------------
---------------------------------------------------ATCCACGCT
GGATATGCACCAGTGCTCGATTGCCACACTGCCCACATTGCCTGTAAATTCGCAGAGCTT
GTTTCCAAG---------------------------------------------------
---------------------------------------GTAGATCGTCGTTCTGGACAA
GCCACTGAGGATGCTCCCAAGAACATCAAGAACGGAGACGCTGCCATCGTCAGACTTGTG
CCCTCCAAGCCCATGTGCGTTGAATCTTTCTCTGAGTACCCTCCTCTGGGTCGTTTTGCC
GTCCGTGATATGCGTCAAACAGTTGC
>Trichia_scabra_JX481343
------------------------------------------------------TTGATC
TACAAGTGTGGTGGTATTGACGAGAGGACAATTGAGAAGTTCGAGAAGGAGGCTTCCGAA
ATGGGCAAGGGTTCCTTCAAGTATGCCTGGGTGTTGGACAAACTCAAGGCCGAGCGTGAG
CGTGGTATTACCATCGATATCGCCTTGTGGAAGTTCGAGACCAACAAGTACTATTTCACC
ATCATTGATGCCCCA---------------------------------------------
------------------------------------------------------------
------------------------------------------------------GGACAC
CGTGATTTCATCAAAAACATGATTACTGGTACTTCCCAGGTTTGCACACATTAACACAGC
ACAATTATTGCCAGTGGTCTGTGCTGACTTGTTCATT-----------------------
------------------------------------------------------------
------------------------------------------------------------
------------------------------------------------------------
------------------------------------------------------------
------------------------------------------------------------
------------------------------------------------------------
------------------------------------------------------------
------------------------------------------------------------
------------------------------------------------------------
------------------------------------------------------------
---------------------------------------TAGGCTGATGCTGCTGTCTTG
GTTATTGCCACCCCTACTG-----------------------------------------
------------------------------------------------------------
----------------------------------------------GTGAGTTCGAGGCT
GGTATTGCTAAGAACGGACAGACTCGTGAGCACGCACTCCTTGCTTACACCCTTGGTGTG
AAGCAAATGATCGTTGCCCTCAACAAGATGGATGACAAATCTGTCAACTGGGGACAAGCT
CGTTATGACGAGATCGTAAAGGAAGTATCTTCCTTCGTCAAGAAGATCGGCTACAATCCC
GAGAAGATTCCCTTCGTACCTATCTCAGGCTGGCACGGAGACAACATGTTGGAGAAATCC
GCCAACCTCCCATGGTACAAGGGCCCAACCCTCCTCGAGGCACTCGACGCCGTTCAA---
------------------------------------------------------------
------------------------------------------------------------
---------------------GAGCCCAAGAGACCAACCGAGAAGCCCCTTCGTATCCCC
CTCCAGGATGTCTACAAAATTGGAG-----------------------------------
------------------------------------------------------------
-------------------GTATTGGAACTGTGCCTGTAGGTCGTGTTGAGACTGGAGTT
CTCAAACCAGGAATGAACGTCACTTTCTCTCCTGCTGGTTTGACCACTGAAGTCAAGTCC
GTCGAGATGCACCACGTAGCTCTACCTGAGGCCGTCCCAGGAGACAACGTTGGTTTCAAC
GTGAAGAATTTGTCTGTTAAG---------------------------------------
------------------------------------------------------------
------------------------------GATATTCGCCGTGGTATGGTTGCTGGTGAT
GCCAAGAACGATCCCCCTCAAGAAACCGAGGACTTCAATGCCCAAGTTATCATCTTGAAC
CACCCTGGCCAA------------------------------------------------
------------------------------------------------------------
------------------------------------------------------------
------------------------------------------------------------
---------------------------------------------------ATCCACGCT
GGATATGCACCAGTACTTGATTGCCACACTGCCCACATTGCCTGTAAATTCGCCGAGCTC
GTTTCTAAG---------------------------------------------------
---------------------------------------GTTGATCGCCGCTCTGGCCAA
GCCACCGAGGAGACTCCTAAGAACATCAAGAACGGAGATGCCGCTATTGTTAAACTCGTG
CCCTCTAAGCCTATGTGCGTTGAATCTTTCGCTGAGTATCCTCCTCTTGGTCGTTTCGCC
GTCCGTGA
>Trichia_sordida_EF513200
-CAGAGCTCGTTATTGGTCATGTAGACGCTGGCAAGTCCACAACTACCGGACACTTGATC
TACAAGTGCGGTGGTATTGACAAGAGGACAATTGAGAAGTTCGAGAAGGAAGCCTCTGAA
ATGGGCAAGGGTTCCTTCAAATACGCATGGGTGTTGGACAAACTCAAGGCCGAGCGTGAA
CGTGGTATTACCATCGATATTGCCTTGTGGAAGTTCGAAACCAACAAGTACTACTTCACT
ATCATTGATGCCCCA---------------------------------------------
------------------------------------------------------------
------------------------------------------------------GGACAC
CGTGATTTCATCAAGAACATGATTACTGGTACCTCCCAGGTAAATCACTCACTAACACAC
ACTTTCACAACGATTTTCAAGTGCTGACTGTAAATT------------------------
------------------------------------------------------------
------------------------------------------------------------
------------------------------------------------------------
------------------------------------------------------------
------------------------------------------------------------
------------------------------------------------------------
------------------------------------------------------------
------------------------------------------------------------
------------------------------------------------------------
------------------------------------------------------------
---------------------------------------CAGGCTGATGCTGCAGTGTTG
GTTATTGCTACCCCCACTG-----------------------------------------
------------------------------------------------------------
----------------------------------------------GAGAGTTCGAGGCC
GGTATTGCCAAGAACGGACAGACTCGCGAGCACGCACTTCTCGCTTACACACTTGGTGTG
AAGCAGATGATCGTTGCCCTCAACAAGATGGATGACAAATCCGTCAGCTGGGGACAGGCC
CGTTATGAGGAAATCGTCAAGGAAGTTTCTTCCTTCGTCAAGAAGATCGGATACAACCCC
GAGAAGATCCCCTTCGTCCCAATCTCTGGCTGGCACGGAGACAACATGTTGGAGAAATCC
GCCAACCTCCCATGGTACAAGGGCCCCACCCTTCTCGAGGCACTCGATGGGGTCTCA---
------------------------------------------------------------
------------------------------------------------------------
---------------------GAGCCCAAAAAACCGACCGAGAAACCCCTCCGCATCCCC
CTTCAGGATGTGTACAAAATTGGTG-----------------------------------
------------------------------------------------------------
-------------------GTATTGGAACTGTCCCCGTAGGTCGTGTTGAGACTGGTATC
CTCAAACCAGGAATGAACGTTACTTTCTCCCCCGCTGGTTTGACCACTGAAGTCAAATCC
GTCGAGATGCATCACGTAGCCCTCCCTGAGGCTGGCCCAGGCGACAACGTTGGTTTCAAC
GTCAAGAACTTGTCTGTCAAG---------------------------------------
------------------------------------------------------------
------------------------------GATATTCGTCGTGGTATGGTTGCTGGTGAT
GCTAAGAACGATCCCCCCCAAGAAACTGAGGACTTCAACGCCCAAATCATCATTCTCAAC
CACCCTGGTCAG------------------------------------------------
------------------------------------------------------------
------------------------------------------------------------
------------------------------------------------------------
---------------------------------------------------ATCCACGCT
GGATACGCCCCAGTGCTCGACTGCCACACTGCCCACATCGCCTGTAAGTTCGCTGAGTTG
GTGTCCAAG---------------------------------------------------
---------------------------------------GTCGATCGTCGTTCTGGACAA
GCCACTGAGGAGAACCCCAACAACATTAAGAACGGAGACGCTGCTATTGTCAGACTCGTC
CCCTCCAAGCCCATGTGCGTTGAGTCCTTTGCTGAGTATCCCCCTCTCGGTCGTTTTGCC
GTCCGTGATATGA
>Trichia_varia_JX481344
------------------------------------------------------TTGATC
TATAAGTGCGGTGGTATTGACAAGAGGACTATTGAGAAGTTCGAGAAGGAAGCATCTGAA
ATGGGTAAGGGCTCCTTTAAGTACGCATGGGTGTTGGACAAACTCAAGGCCGAGCGTGAG
CGTGGTATCACCATCGATATCGCCTTGTGGAAATTCGAGACCAACAAGTACTATTTCACT
ATCATTGATGCCCCA---------------------------------------------
------------------------------------------------------------
------------------------------------------------------GGACAC
CGCGACTTTATCAAGAATATGATTACTGGTACCTCCCAGGTAACACAAACACTCACTCGC
CCACCTTCCGCCTGAACTTGTGCTGACTCGCAATTT------------------------
------------------------------------------------------------
------------------------------------------------------------
------------------------------------------------------------
------------------------------------------------------------
------------------------------------------------------------
------------------------------------------------------------
------------------------------------------------------------
------------------------------------------------------------
------------------------------------------------------------
------------------------------------------------------------
---------------------------------------CAGGCTGATGCTGCCGTCTTG
GTCATTGCCACACCCACAG-----------------------------------------
------------------------------------------------------------
----------------------------------------------GTGAGTTCGAGGCT
GGTATTGCCAAGAACGGGCAGACTCGTGAGCACGCACTTCTTGCTTACACACTCGGTGTG
AAGCAAATGATTGTAGCCCTCAACAAGATGGATGACAAATCCGTCAACTGGTCTCAAACC
CGTTATGACGAAATTGTTAAGGAAGTGTCATCCTTCGTAAAAAAGATCGGATACAATCCT
GAGAAGATCCCCTTCGTACCCATTTCTGGATGGCACGGAGACAACATGCTAGAAAAGTCC
CCCAACCTTGCTTGGTACAAGGGTCCCACCCTTCTTGAGGCACTAGATGCCGTCTCC---
------------------------------------------------------------
------------------------------------------------------------
---------------------GAACCCAAGAGACCAACTGAGAAGCCCCTCCGTATCCCT
CTCCAAGACGTCTACAAGATTGGAG-----------------------------------
------------------------------------------------------------
-------------------GTATCGGAACTGTTCCTGTTGGTCGTGTTGAAACTGGTGTC
CTCAAGCCTGGAATGAACGTTACCTTCTCTCCTGCTGGATTAACCACTGAAGTTAAATCT
GTGGAGATGCACCATGTTGCCTTACCAGAGGCTCTCCCAGGAGATAATGTGGGTTTCAAT
GTCAAGAACTTGTCTGTCAAG---------------------------------------
------------------------------------------------------------
------------------------------GATATTCGCCGTGGTATGGTTGCTGGTGAT
GCAAAGAACGACCCTCCCCAGGAGACTGAAGACTTCAACGCTCAAGTGATCATCCTTAAC
CACCCTGGTCAA------------------------------------------------
------------------------------------------------------------
------------------------------------------------------------
------------------------------------------------------------
---------------------------------------------------ATTCATGCT
GGTTACGCTCCTGTGCTCGATTGTCACACTGCCCACATCGCTTGTAAGTTCGCTGAATTA
GTTTCTAAG---------------------------------------------------
---------------------------------------GTAGATCGTCGCTCTGGGCAA
GCCACAGAAGATGCCCCCAAGAACATCAAGAACGGGGATGCTGCCATCGTGAGACTCGTT
CCTTCCAAGCCTATGTGTGTTGAATCCTTTTCCGAGTACCCTCCTCTCGGTCG
>Tubifera_dimorphotheca_JX481345
------------------------------------------------------------
n-----------------------------ATTGAGAAGTTCGAGAAGGAAGCCGCTGAG
ATGGGGAAGGGTTCGTTCAAGTATGCGTGGGTGTTAGATAAACTCAAGGCCGAGCGTGAG
CGTGGTATCACCATCGATATTGCCTTGTGGAAGTTCGAGACCAACAAGTACTACTTCACC
ATTATTGATGCCCCA---------------------------------------------
------------------------------------------------------------
------------------------------------------------------GGCCAT
CGTGATTTCATTAAGAACATGATCACCGGTACTTCCCAGGTAAACTTGACGAATTCTTCT
ATGTTTATTGATGCATTATGAATTGATAACTATTGAACACAGCTGTGCGTGTTTGTGAAT
GTTTGCAAAAATTTGTAGTATATAGTTTCAAACATGATATAAGTTGAA------------
------------------------------------------------------------
------------------------------------------------------------
------------------------------------------------------------
------------------------------------------------------------
------------------------------------------------------------
------------------------------------------------------------
------------------------------------------------------------
------------------------------------------------------------
------------------------------------------------------------
---------------------------------------CAGGCTGATGCTGCAGTTTTG
GTTATTGCCTCCCCTACAG-----------------------------------------
------------------------------------------------------------
----------------------------------------------GAGAGTTCGAGGCT
GGTATTGCCAAGAACGGACAGACCCGTGAGCACGCCCTGCTCGCCTACACCCTCGGTGTG
AAGCAAATGATTGTTGCTATCAACAAGATGGACGACAAGTCAGTCAACTGGGCCCAAGCT
CGTTATGACGAGATCGTCAAGGAAGTTACTTCCTTCGTTAAGAAGATTGGTTACAGCCCA
GACAAGATCCCCTTCGTCCCCATTTCTGGATGGCACGGAGATAACATGCTTGAGAAGTCC
GCCAACCTCCCCTGGTACAAGGGCTTCACCCTCCTCGAGGCACTCGACAACGTACAG---
------------------------------------------------------------
------------------------------------------------------------
---------------------GAGCCCAAGAGACCAACCGAGAAGCCTCTCCGCATCCCC
CTTCAGGATGTGTACAAGATCGGAG-----------------------------------
------------------------------------------------------------
-------------------GTATTGGTACTGTCCCCGTCGGTCGTGTTGAGACTGGTATC
CTCAAGCCAGGCATGAACGTTACTTTCTCTCCTGCTGGTTTAACCACTGAAGTCAAGTCA
GTTGAGATGCATCACGTCTCCCTCCCTGAGGCTCTTCCAGGTGACAACGTTGGTTTTAAC
GTTAAGAACTTGTCCGTTAAG---------------------------------------
------------------------------------------------------------
------------------------------GATATTCGCCGTGGTATGGTTGCTGGTGAT
GCCAAGAACGATCCTCCTCAGGAGACTGAAGACTTCAACGCCCAAGTCATCGTCCTTAAC
CACCCTGGTCAG------------------------------------------------
------------------------------------------------------------
------------------------------------------------------------
------------------------------------------------------------
---------------------------------------------------ATCCATGCT
GGATATGCCCCAGTGCTCGATTGCCACACCGCTCACATCGCCTGTAAGTTCTCTGAGATC
CTTTCCAAA---------------------------------------------------
---------------------------------------GTTGACCGTCGCTCTGGTCAG
GAGACTGAGGCTGCCCCTAAGAACATTAAGAACGGAGACTCTGCTATCGTCAGACTTACT
CCCTCCAAGCCCATGTGCGTTGAGTCCTATTCTGACTACCCCCCTCTTGGTCGTTTCGCC
GTGCGTGATAT
>Tubifera_ferruginosa_EF513201
------------------------------------------------------------
n-----------------------------------------------------------
---GGAAAGGGTTCATTCAAGTATGCCTGGGTGTTAGATAAACTCAAGGCCGAGCGTGAA
CGTGGTATCACCATTGATATTGCTTTGTGGAAATTCGAGACCAACAAATACTACTTCACC
ATTATTGATGCCCCA---------------------------------------------
------------------------------------------------------------
------------------------------------------------------GGCCAT
CGCGATTTTATCAAGAACATGATCACCGGTACTTCCCAGGTAACTTGCGTCTTATCTACC
TTCCTCTCTTGCTGTTCTCTTTGTATCCCTTTATTTCACTACGAAAGTCAACCTTATCTG
CTTATCCTCGTATATTGTTTATGTCTGATTCGTACTACGTAATCATAAATCATAGTCGTC
ATCGGCATTTTCTCAGAGAGATTAAAAGCTTCTAGTTATAATTTCTCCTAACGGTTTGAT
TA----------------------------------------------------------
------------------------------------------------------------
------------------------------------------------------------
------------------------------------------------------------
------------------------------------------------------------
------------------------------------------------------------
------------------------------------------------------------
------------------------------------------------------------
---------------------------------------CAGGCTGATGCTGCAGTTTTA
GTCATTGCCTCACCTACTG-----------------------------------------
------------------------------------------------------------
----------------------------------------------GAGAGTTCGAGGCT
GGTATCGCCAAGAACGGACAGACTCGTGAGCACGCACTTCTTGCCTACACTCTTGGTGTG
AAGCAAATGATTGTTGCCATCAACAAGATGGATGACAAGTCAGTCAACTGGGCCCAAGCT
CGTTACGATGAAATCGTTAAGGAGGTGTCTTCCTTCGTCAAGAAGATTGGTTACAGTCCC
GATAAAATCCCCTTCGTTCCCATTTCTGGATGGCACGGAGACAACATGCTTGAGAAGTCT
GCTAACCTCCCATGGTACAAGGGATTCACCCTCCTTGAGGCACTTGATAACGTAACA---
------------------------------------------------------------
------------------------------------------------------------
---------------------GAGCCTAAGAGACCAACTGATAAGCCTCTTCGTATTCCC
CTTCAGGATGTGTACAAGATTGGAG-----------------------------------
------------------------------------------------------------
-------------------GTATCGGAACAGTTCCTGTAGGACGTGTTGAAACTGGTGTC
CTCAAGCCAGGCATGAACGTTACTTTCTCCCCTGCTGGGTTGACAACTGAAGTTAAGTCA
GTTGAGATGCATCACGTGTCCCTTCCTGAGGCCTTCCCAGGTGACAACGTCGGTTTCAAC
GTTAAGAACTTATCTGTTAAG---------------------------------------
------------------------------------------------------------
------------------------------GATATTCGTCGTGGTATGGTTGCTGGAGAT
GCCAAGAACGATCCCCCTCAAGAGACTGAAGACTTCAACGCTCAAGTTATCATCCTTAAC
CACCCCGGTCAG------------------------------------------------
------------------------------------------------------------
------------------------------------------------------------
------------------------------------------------------------
---------------------------------------------------ATCCATGCT
GGTTATGCTCCAGTGCTCGATTGCCACACTGCTCACATCGCCTGTAAGTTCTCAGAGATC
CTTTCCAAG---------------------------------------------------
---------------------------------------GTTGATCGCCGCTCTGGTCAA
GAAACTGAGTCTGCCCCCAAGAACATTAAGAACGGAGATGCCGCCATTGTCAGACTTACT
CCCTCCAAGCCCATGTGCGTTGAATCCTT-GCTGACTACCCCC-n--
